# Supplementary material for: Robust cortical encoding of 3D tongue shape during feeding in macaques
Source: Springer Nature journal article supplement (doi:10.1038/s41467-023-38586-3), 2023-05-24
Supplement: MOESM3 [file 41467_2023_38586_MOESM3_ESM.pdf › 41467_2023_38586_MOESM3_ESM.pdf]

**File name: Supplementary Movie 1**

**Description: Reconstruction of tongue shape principal components.** Rendering generated with Autodesk Maya 2022.

**File name: Supplementary Movie 2**

**Description: Real (black) and decoded (red) tongue shape from a representative test trial from monkey Ry.** Marker positions are reconstructed from the 7 independently decoded shape principal components. Decoder input was the time-varying firing rates of 100 primary motor cortex neurons. Mandible is rendered for orientation purposes only, as shape-based marker positions are coordinate system independent. Playback speed is .25x real time. Rendering generated with Autodesk Maya 2022.
