# Supplementary material for: Robust cortical encoding of 3D tongue shape during feeding in macaques
Source: Nat Commun. 2023 May 24;14:2991. doi: 10.1038/s41467-023-38586-3 (PMC10209084; doi:10.1038/s41467-023-38586-3)
Supplement: Supplementary file 7 — Source Data [file 41467_2023_38586_MOESM7_ESM.xlsx]

## Sheet: Figure 2a
Figure 2a
	Variable
	Decoded							Real
Frame	Sagittal Flexion	Protrusion	Roll	Length (Anterior)	Width (Anterior)	Length (Middle)	Width (Middle)	Sagittal Flexion	Protrusion	Roll	Length (Anterior)	Width (Anterior)	Length (Middle)	Width (Middle)
1	150.103	36.8754	22.2737	17.0571	14.5447	24.9076	15.078	153.22	36.089	19.8483	17.5828	13.9263	25.7549	15.7807
2	149.35	37.4741	21.0571	17.2731	14.9493	25.5605	15.4401	153.229	36.6887	18.2588	17.6358	14.0904	26.4219	16.07
3	149.05	37.931	19.4407	17.4146	15.0657	25.909	15.7025	152.833	37.2707	16.7802	17.7239	14.2628	27.0587	16.3414
4	148.5	37.5695	19.8391	17.7642	14.9967	26.228	15.7268	152.055	37.842	15.4005	17.8437	14.459	27.6326	16.5931
5	147.306	38.0904	17.7217	17.821	15.398	26.8355	16.0909	150.969	38.414	14.1091	17.9848	14.6855	28.1199	16.8278
6	146.424	38.819	16.7611	17.9492	15.6169	27.2752	16.5092	149.71	38.9973	12.894	18.1336	14.941	28.5072	17.0469
7	145.965	39.4737	14.5637	18.1245	15.964	27.7803	16.814	148.456	39.5959	11.7472	18.2758	15.2172	28.7913	17.2467
8	146.083	40.5968	13.6456	18.4677	16.1252	27.9463	17.019	147.397	40.2021	10.6703	18.3985	15.5009	28.9753	17.4176
9	145.238	41.4291	14.2441	18.7	16.2737	28.1407	17.1554	146.688	40.7944	9.677	18.4907	15.7754	29.0644	17.5472
10	143.993	41.6433	13.1252	18.9641	16.4349	28.2178	17.3778	146.423	41.3408	8.78863	18.5435	16.0239	29.0626	17.6259
11	144.994	42.0477	12.0452	18.9243	16.7359	28.3202	17.5217	146.612	41.8073	8.02552	18.5519	16.2325	28.9719	17.652
12	144.499	41.8645	10.9652	19.0102	16.8607	28.303	17.6077	147.192	42.1691	7.39901	18.5169	16.3939	28.7948	17.6338
13	145.313	42.242	10.3533	19.2569	17.1215	28.0404	17.7284	148.052	42.42	6.90578	18.4455	16.5092	28.5388	17.5873
14	146.952	42.4678	10.3256	19.1008	17.2115	27.9125	17.6542	149.063	42.5769	6.52659	18.3482	16.5884	28.2212	17.5311
15	146.684	42.953	9.65995	19.1551	17.4543	27.7888	17.7427	150.114	42.6754	6.23039	18.2321	16.6465	27.8697	17.48
16	147.102	41.6856	10.7958	18.9225	17.3657	27.4331	17.6144	151.14	42.7603	5.98162	18.0933	16.6986	27.519	17.4399
17	147.156	41.8911	10.0484	18.6648	17.5849	27.0705	17.6741	152.125	42.8713	5.74761	17.9114	16.7536	27.2028	17.4071
18	148.663	42.1954	9.46823	18.4592	17.558	26.9367	17.558	153.096	43.0324	5.50712	17.6519	16.8091	26.9441	17.3725
19	150.346	42.6981	8.58533	18.1238	17.2427	26.6211	17.518	154.092	43.2459	5.26114	17.277	16.8497	26.7475	17.3275
20	152.036	42.9795	7.90043	17.8983	17.0951	26.4704	17.5096	155.121	43.4951	5.04311	16.7632	16.8493	26.5975	17.2711
21	153.2	43.8797	8.30159	17.2429	16.9594	26.0748	17.4064	156.126	43.7524	4.92213	16.1191	16.7769	26.4626	17.2129
22	153.077	42.9121	10.894	16.685	16.5516	25.8357	17.2411	156.957	43.9888	4.99272	15.3954	16.6058	26.3056	17.1715
23	153.816	43.4067	9.77157	15.9523	16.3718	25.5222	17.2357	157.388	44.1813	5.34694	14.6803	16.3232	26.0964	17.1684
24	154.601	43.7273	9.41809	15.1826	15.8872	25.3357	17.2442	157.163	44.3141	6.0326	14.0784	15.9373	25.8213	17.2197
25	153.589	43.8037	10.357	14.5188	15.6671	25.0887	17.2018	156.079	44.3751	7.01208	13.6794	15.4817	25.4878	17.3289
26	153.339	43.8708	9.43954	14.0393	15.4016	25.0479	17.2693	154.058	44.351	8.14199	13.5275	15.0119	25.1224	17.4834
27	151.586	43.1379	10.4666	13.7992	15.0363	24.8036	17.2009	151.203	44.224	9.19193	13.6027	14.5964	24.7634	17.6567
28	151.391	43.8977	11.4144	13.1658	14.6856	24.738	17.3215	147.789	43.9752	9.9073	13.8241	14.302	24.4503	17.8138
29	149.72	43.6719	11.4528	12.7036	14.7703	24.9295	17.4716	144.202	43.5923	10.102	14.0753	14.1773	24.2153	17.9188
30	148.171	42.8771	11.3576	12.8057	14.5876	24.9159	17.454	140.83	43.0792	9.74854	14.244	14.2387	24.077	17.9423
31	146.699	42.2125	12.8648	12.9249	14.503	24.8644	17.4024	137.951	42.4635	9.02803	14.2629	14.4633	24.0382	17.8652
32	143.654	41.7588	13.8331	13.0651	14.4817	24.8582	17.2342	135.658	41.7948	8.31168	14.1337	14.7921	24.0876	17.6805
33	141.367	40.0769	16.9036	13.3581	14.2686	24.9001	17.1648	133.843	41.1352	8.0702	13.9276	15.1434	24.2038	17.3929
34	138.788	39.4085	18.7095	13.4075	14.2438	24.8231	16.9139	132.266	40.5437	8.73663	13.7593	15.4321	24.3603	17.0165
35	136.378	38.9197	19.5567	13.8935	14.2124	24.8006	16.7514	130.66	40.059	10.5705	13.7444	15.5905	24.5294	16.5732
36	134.395	38.1508	22.5859	14.187	14.0643	24.7022	16.5742	128.844	39.6891	13.5741	13.9569	15.5828	24.687	16.0904
37	132.221	37.7372	24.826	14.6154	13.9737	24.8138	16.2843	126.809	39.4107	17.4925	14.4008	15.4097	24.8144	15.5987
38	129.781	37.3327	28.2461	14.9183	13.8717	24.7323	16.1304	124.718	39.1789	21.8971	15.0084	15.1021	24.9004	15.1278
39	128.083	37.3075	29.2556	15.2354	13.8643	24.7749	16.0797	122.858	38.9438	26.3201	15.6624	14.708	24.9409	14.7031
40	126.428	36.3749	34.3459	15.5267	13.6262	24.4018	15.9126	121.535	38.6674	30.3867	16.2353	14.2774	24.9379	14.3414
41	124.779	35.959	37.4955	15.9133	13.3833	24.3791	15.5063	120.978	38.3349	33.8975	16.6294	13.8509	24.8977	14.0491
42	124.644	35.5964	39.2426	16.0867	13.3953	24.3302	15.2711	121.27	37.9567	36.834	16.8035	13.4565	24.8287	13.8226
43	124.782	35.0873	41.2353	16.4248	13.1637	24.0976	14.9265	122.338	37.5616	39.2977	16.7787	13.112	24.7398	13.651
44	124.528	34.9917	42.5289	16.3991	13.2178	24.2394	14.7883	123.992	37.1847	41.4146	16.6228	12.8317	24.6391	13.5208
45	125.265	34.4755	43.3493	16.2487	13.1216	24.0077	14.5811	126	36.8555	43.2517	16.4219	12.6311	24.5341	13.4202
46	126.59	34.0334	44.1614	16.3436	13.0875	23.7963	14.214	128.147	36.5899	44.7778	16.2513	12.5269	24.4312	13.3415
47	127.837	34.2688	43.1017	16.4958	13.1214	23.6794	13.946	130.288	36.3891	45.8789	16.1555	12.531	24.3358	13.2813
48	131.095	34.3611	42.4968	16.5691	13.0659	23.8012	13.8339	132.35	36.2431	46.4129	16.1439	12.6429	24.252	13.2397
49	133.138	34.8287	40.8161	16.5579	13.2189	23.7562	13.7107	134.316	36.1382	46.2731	16.1992	12.8438	24.1823	13.2177
50	135.632	35.0377	39.3387	16.7311	13.3498	23.7047	13.6558	136.192	36.0629	45.4314	16.294	13.0968	24.1286	13.2165
51	138.129	35.4566	37.5372	16.7649	13.5319	23.8682	13.8229	137.979	36.0126	43.9466	16.406	13.3551	24.0934	13.2375
52	139.594	35.6911	34.808	16.5797	13.4999	23.9347	13.9347	139.656	35.9897	41.9414	16.5255	13.5746	24.0823	13.2835
53	139.893	36.0155	33.7235	16.5373	13.6412	24.091	13.9404	141.187	36.0025	39.5641	16.6555	13.7274	24.1068	13.3596
54	141.99	36.3083	32.0198	16.4233	13.7268	24.255	13.9135	142.526	36.0619	36.9573	16.8034	13.81	24.1845	13.4736
55	143.709	36.8347	29.9343	16.4064	13.8354	24.4973	14.0113	143.638	36.1797	34.2425	16.9722	13.8433	24.3375	13.634
56	145.252	37.2401	27.7183	16.4879	13.8776	24.4779	14.1131	144.499	36.3652	31.5227	17.1547	13.8641	24.5874	13.8475
57	146.973	37.5487	24.5875	16.7093	14.1989	25.1689	14.2805	145.105	36.6243	28.8914	17.3326	13.9113	24.9493	14.1161
58	147.679	37.762	23.8856	16.7172	14.3599	25.5317	14.4977	145.469	36.9564	26.4376	17.4816	14.0128	25.4253	14.4353
59	148.26	38.4001	22.9108	16.6847	14.5607	26.1371	14.765	145.621	37.3533	24.2382	17.5778	14.1771	26.0012	14.7945
60	147.997	38.95	20.3176	16.7505	14.875	26.8427	15.1394	145.606	37.7983	22.3425	17.605	14.3926	26.6466	15.179
61	146.598	38.5116	20.8215	16.8699	14.9796	27.4692	15.4932	145.486	38.2671	20.7576	17.5589	14.6347	27.3198	15.5726
62	145.556	38.8669	20.555	17.1082	15.046	27.94	15.7164	145.333	38.7318	19.4445	17.4484	14.8762	27.976	15.9604
63	145.308	38.7455	18.248	17.1675	15.1881	28.2072	16.0817	145.218	39.1667	18.3302	17.2943	15.0969	28.5756	16.3301
64	145.087	39.0151	16.8796	17.3399	15.4244	28.6052	16.3128	145.2	39.5541	17.3314	17.1267	15.2891	29.0905	16.6729
65	144.658	38.9127	16.5134	17.3138	15.4976	28.7345	16.4083	145.303	39.8887	16.3813	16.9813	15.4573	29.5073	16.9827
66	144.415	39.0952	14.9759	17.2501	15.6773	28.9509	16.6646	145.51	40.1779	15.4483	16.895	15.6128	29.8257	17.256
67	143.876	39.0392	14.1574	17.1538	15.8078	29.0496	17.0013	145.756	40.439	14.5406	16.8997	15.7669	30.0542	17.4913
68	145.033	39.3709	14.2469	17.3948	16.0523	29.3347	17.2901	145.947	40.6922	13.6943	17.0157	15.9246	30.205	17.6894
69	145.536	39.0261	13.1239	17.5481	16.2565	29.1451	17.4688	145.976	40.9534	12.9536	17.246	16.0826	30.2889	17.8539
70	145.43	39.1152	13.0273	17.4852	16.3136	28.9902	17.6236	145.759	41.2282	12.3504	17.5724	16.2323	30.3135	17.9906
71	145.026	39.0234	12.4355	17.6692	16.6306	28.927	17.8134	145.25	41.5103	11.8924	17.9576	16.3637	30.2826	18.1068
72	144.887	39.6652	12.2058	17.7111	16.8139	28.8565	17.931	144.462	41.7834	11.5618	18.3518	16.4719	30.1974	18.2094
73	145.147	40.0157	10.9032	17.8183	17.029	28.5485	18.0787	143.462	42.0271	11.3227	18.7038	16.5603	30.0574	18.3035
74	145.023	40.3708	11.4986	17.9147	17.2539	28.3541	18.0963	142.356	42.2238	11.1328	18.9728	16.6407	29.8615	18.3906
75	144.678	39.6463	12.1006	17.9987	17.3158	27.8118	18.1272	141.271	42.3642	10.9546	19.1376	16.7294	29.6069	18.4692
76	145.276	40.1319	11.8368	18.1285	17.41	27.4599	18.1877	140.327	42.4496	10.7643	19.1993	16.8417	29.2887	18.5353
77	146.491	40.7932	11.3974	17.9662	17.2272	27.128	18.1397	139.62	42.4909	10.5548	19.1785	16.985	28.8999	18.5844
78	147.056	40.8987	10.8495	18.0042	17.2913	26.8366	18.0629	139.219	42.5038	10.3331	19.1068	17.1551	28.4347	18.6122
79	148.53	41.1397	9.90433	18.1498	17.2524	26.5901	17.8708	139.164	42.5042	10.1142	19.0159	17.3353	27.8931	18.6165
80	148.653	41.3518	9.38937	18.0502	17.2032	26.2919	17.8307	139.479	42.5031	9.91269	18.9289	17.4994	27.2876	18.5966
81	149.798	41.8736	8.81917	18.1347	17.0258	25.9376	17.8162	140.182	42.5059	9.73462	18.8557	17.6176	26.6486	18.5533
82	150.685	41.8744	8.9914	18.2241	16.8585	25.5789	17.7905	141.285	42.5122	9.57253	18.7941	17.6646	26.0256	18.4876
83	151.456	41.6662	9.19597	18.1489	16.5881	25.2872	17.5919	142.791	42.5193	9.40696	18.7348	17.6267	25.4826	18.401
84	153.461	42.311	8.24892	18.1391	16.3251	24.8989	17.4816	144.675	42.5249	9.21374	18.6678	17.5056	25.087	18.2948
85	155.013	42.1577	7.7855	18.0428	16.1402	24.745	17.2362	146.873	42.5284	8.97512	18.5893	17.319	24.8942	18.171
86	156.183	42.2656	7.49855	17.911	15.9722	24.7203	17.107	149.274	42.5314	8.69077	18.5044	17.0953	24.9329	18.0323
87	157.934	42.3856	8.03901	17.7078	15.6434	24.436	16.8919	151.722	42.5358	8.38386	18.4272	16.8662	25.195	17.8819
88	158.658	42.5826	6.81003	17.7582	15.4795	24.5315	16.8485	154.039	42.542	8.09898	18.3758	16.6582	25.6354	17.7235
89	158.825	42.7284	6.77922	17.8097	15.3511	24.7139	16.7636	156.058	42.5487	7.89133	18.3663	16.4857	26.1812	17.56
90	159.58	42.7203	7.95601	17.7419	15.2163	25.1593	16.5999	157.654	42.5536	7.8097	18.4054	16.3481	26.75	17.3933
91	160.273	42.8741	7.8918	17.7684	15.14	25.5337	16.4755	158.771	42.5563	7.879	18.4862	16.2323	27.2694	17.2241
92	159.803	42.7124	7.7534	17.745	15.1896	25.8505	16.4647	159.431	42.5614	8.08879	18.5873	16.1186	27.6945	17.0523
93	160.365	42.2471	7.55414	17.8691	14.9936	26.0707	16.2538	159.725	42.5799	8.3921	18.6762	15.9885	28.0155	16.8784
94	160.773	42.199	7.82791	17.9865	14.9716	26.5563	16.1449	159.787	42.628	8.71553	18.7169	15.832	28.2547	16.7042
95	160.599	42.3394	7.297	17.9042	15.0763	26.9236	16.0537	159.764	42.7229	8.97956	18.6797	15.6512	28.4545	16.5333
96	161.485	42.2942	6.91752	18.1631	15.0045	27.2717	15.9765	159.783	42.8774	9.1246	18.548	15.4597	28.6608	16.3698
97	162.741	43.0038	6.83313	17.8454	14.8659	27.4661	15.9615	159.931	43.094	9.13543	18.323	15.2785	28.9079	16.2181
98	162.852	42.9371	5.92765	17.7626	14.8085	27.7586	15.9002	160.236	43.363	9.05556	18.0216	15.1288	29.2097	16.0808
99	162.493	43.0286	6.03472	17.7848	14.7568	27.9552	15.7297	160.668	43.6626	8.98435	17.6711	15.0261	29.5586	15.959
100	162.599	42.7172	6.06381	17.7334	14.6199	28.5548	15.6705	161.136	43.9637	9.05363	17.3017	14.9761	29.9302	15.8523
101	160.28	42.761	6.28026	17.755	14.6839	28.7376	15.5333	161.496	44.2353	9.38663	16.94	14.9727	30.2917	15.76
102	160.433	42.8927	6.74025	17.8435	14.6433	28.7921	15.4131	161.572	44.451	10.0497	16.6065	15	30.61	15.681
103	159.578	43.0853	6.9361	17.6318	14.6418	29.2278	15.2491	161.185	44.5919	11.0133	16.3153	15.035	30.8571	15.6143
104	158.655	42.76	6.78281	17.6247	14.7746	29.2275	15.1493	160.186	44.6478	12.1395	16.0765	15.0527	31.0132	15.5564
105	157.991	43.255	7.35098	17.4823	15.0571	29.1396	15.3584	158.507	44.6154	13.2075	15.8976	15.031	31.0671	15.5006
106	156.983	43.286	6.97742	17.2669	15.1702	29.3738	15.2283	156.191	44.4956	13.9749	15.7816	14.9553	31.0177	15.4359
107	153.619	42.9683	8.30259	16.8208	15.1667	29.435	15.0985	153.407	44.2911	14.2603	15.7227	14.8228	30.8751	15.3486
108	150.684	42.555	9.24748	16.4256	15.1745	29.3727	14.9928	150.423	44.0052	14.0191	15.7019	14.6443	30.6614	15.2265
109	147.585	42.6016	9.37574	16.1207	15.4272	29.4555	14.9382	147.548	43.6419	13.3839	15.6864	14.4438	30.4096	15.0639
110	145.478	42.8948	9.2509	15.569	15.5927	29.2128	15.0603	145.044	43.2068	12.6513	15.6353	14.254	30.1584	14.8662
111	141.895	42.8066	10.9619	14.88	15.646	29.1924	15.0432	143.05	42.7066	12.2133	15.5118	14.1088	29.9446	14.6502
112	139.175	41.5656	13.5824	14.8534	15.4726	29.1362	14.8736	141.526	42.1489	12.455	15.2979	14.0336	29.7927	14.4419
113	136.522	41.1846	14.7363	14.6248	15.3194	29.339	14.7584	140.255	41.5407	13.6517	15.0064	14.0361	29.7078	14.2689
114	134.1	40.5813	16.3852	14.5898	15.2894	29.1233	14.7954	138.903	40.8872	15.9017	14.6837	14.1014	29.6722	14.152
115	132.783	40.6949	19.5803	14.6052	15.197	29.2244	14.8427	137.119	40.1911	19.117	14.4013	14.1922	29.6487	14.0985
116	130.743	40.3341	23.5866	14.395	14.9985	29.2266	14.6205	134.65	39.454	23.0704	14.2362	14.2561	29.591	14.0993
117	127.748	39.5464	26.2534	14.2723	14.8238	28.7683	14.7145	131.429	38.6783	27.4775	14.2476	14.2384	29.4559	14.1315
118	124.916	38.6942	30.9975	14.1712	14.5893	28.8619	14.463	127.608	37.8696	32.081	14.4577	14.096	29.2154	14.1661
119	124.689	37.5122	34.984	14.3566	14.1129	28.6819	14.4537	123.519	37.0384	36.7031	14.8424	13.8097	28.864	14.1765
120	122.531	37.1755	39.1215	14.4955	13.8339	28.3755	14.2687	119.591	36.2001	41.2513	15.3374	13.3894	28.4192	14.1457
121	122.177	36.8857	41.4315	14.8334	13.5858	28.2282	14.2019	116.236	35.3733	45.6825	15.856	12.8715	27.9151	14.0697
122	121.881	36.5417	45.3924	14.9115	13.2688	28.0366	14.0265	113.745	34.5764	49.9486	16.3129	12.3095	27.3928	13.956
123	121.408	35.8988	50.3159	15.1775	12.7757	27.809	13.8853	112.236	33.8249	53.9501	16.6465	11.76	26.8888	13.8195
124	121.636	35.8925	49.406	15.1202	12.4027	27.7617	13.9241	111.647	33.1285	57.5239	16.8321	11.2699	26.4271	13.677
125	121.244	35.0384	54.9507	15.4169	11.8618	27.6275	13.7093	111.789	32.4906	60.4685	16.8828	10.8677	26.0146	13.5426
126	122.53	35.7585	56.1839	15.4513	11.7698	27.5708	13.6131	112.419	31.9099	62.5981	16.8403	10.5614	25.6428	13.4261
127	121.421	34.9209	55.6194	15.6335	11.3641	27.362	13.6373	113.309	31.3834	63.8029	16.7574	10.3427	25.294	13.3319
128	119.773	34.5772	57.7991	15.7716	11.0894	27.1472	13.6614	114.297	30.9097	64.0915	16.6819	10.1952	24.9496	13.2603
129	116.701	34.2011	58.2353	15.6838	10.8928	26.7958	13.5793	115.303	30.4919	63.6001	16.6429	10.1016	24.5978	13.2076
130	117.332	34.0496	58.4891	15.7329	10.9409	26.6862	13.5008	116.318	30.1395	62.5656	16.6469	10.0485	24.2399	13.1663
131	115.738	34.3609	60.5258	15.7765	10.8493	26.4127	13.5761	117.369	29.8669	61.271	16.6803	10.0261	23.8914	13.1262
132	115.244	34.0715	60.3756	15.7633	10.8824	25.9067	13.5194	118.495	29.6905	59.9817	16.7179	10.0248	23.5783	13.0755
133	115.403	33.6475	59.5401	15.8871	10.8373	25.7328	13.8674	119.73	29.6242	58.8885	16.7338	10.0319	23.3301	13.0046
134	116.232	33.8768	57.5107	15.8598	11.0406	25.4007	13.9125	121.096	29.6744	58.072	16.7108	10.0302	23.1709	12.909
135	115.78	33.6342	59.7612	15.9105	11.2039	25.1886	14.0946	122.606	29.8363	57.4957	16.6457	10.0024	23.1108	12.7922
136	114.699	33.7013	57.8523	15.909	11.3737	24.8467	14.1981	124.275	30.0927	57.0263	16.549	9.93716	23.1425	12.6656
137	114.582	33.6873	59.9563	16.2043	11.3002	24.8531	14.3518	126.116	30.4161	56.4759	16.4406	9.83757	23.2417	12.5453
138	114.317	33.3411	58.0462	16.0646	11.5282	24.6417	14.5213	128.139	30.7733	55.6538	16.3422	9.72399	23.374	12.4464
139	113.592	33.1652	56.7334	16.0185	11.6911	24.5377	14.7754	130.338	31.1314	54.4168	16.2707	9.63142	23.5046	12.3774
140	115.232	33.2008	56.4325	16.1006	11.8954	24.2582	14.7628	132.683	31.4636	52.7055	16.2338	9.59983	23.6073	12.3375
141	115.889	33.2657	54.5785	16.1623	12.0141	24.204	14.958	135.116	31.7528	50.5566	16.2297	9.66079	23.672	12.3178
142	117.524	33.3292	54.1628	16.2958	12.0673	23.859	14.8306	137.556	31.9919	48.0885	16.2509	9.82553	23.7057	12.3061
143	118.691	33.4272	54.0946	16.3022	12.2958	23.6656	14.8321	139.907	32.1822	45.4658	16.29	10.0796	23.729	12.2946
144	121.282	33.3631	52.6814	16.3965	12.4834	23.4179	14.7549	142.068	32.3285	42.8534	16.3438	10.3871	23.7682	12.2846
145	123.322	32.9674	52.1886	16.337	12.4758	23.2258	14.7294	143.952	32.4364	40.3758	16.4163	10.7024	23.847	12.2879
146	126.3	33.0563	50.2268	16.2223	12.6661	23.1891	14.8039	145.498	32.51	38.0934	16.5171	10.9861	23.98	12.3228
147	128.075	33.4376	49.1705	16.2562	13.0681	23.4783	15.0736	146.674	32.5512	36.0045	16.6562	11.2175	24.1697	12.4063
148	130.996	33.8443	47.5201	16.3495	13.3991	23.6673	15.1453	147.491	32.5622	34.0679	16.8385	11.3999	24.4083	12.5464
149	132.544	34.4031	47.2948	16.3593	13.3146	23.7255	15.2155	147.998	32.5461	32.2371	17.0589	11.556	24.6821	12.7365
150	135.701	34.2115	47.4166	16.4726	13.2688	23.7522	15.0533	148.274	32.5084	30.4892	17.3006	11.7152	24.9766	12.9563
151	138.075	34.2921	45.1271	16.4825	13.3595	23.9098	15.1963	148.423	32.4549	28.8392	17.5376	11.8988	25.2812	13.1773
152	140.201	34.6524	44.0358	16.4571	13.3596	23.9862	15.2608	148.545	32.3888	27.3336	17.7408	12.1086	25.5895	13.3719
153	142.651	34.9735	40.5923	16.5473	13.4672	24.1754	15.3213	148.726	32.3086	26.0291	17.8839	12.3244	25.8986	13.5226
154	143.076	34.8453	40.5043	16.5287	13.5031	24.6709	15.5251	149.009	32.2062	24.9659	17.9504	12.5101	26.2054	13.6264
155	144.863	35.1186	40.0193	16.5688	13.6059	24.894	15.5711	149.395	32.0691	24.1477	17.9368	12.6268	26.5038	13.6956
156	146.559	34.905	39.9157	16.5517	13.6164	25.2348	15.6713	149.84	31.885	23.5357	17.8531	12.6469	26.7823	13.7525
157	148.526	35.1081	37.9939	16.4833	13.7421	25.6732	15.7253	150.273	31.6478	23.0598	17.7211	12.5644	27.0259	13.8215
158	149.272	35.286	37.1762	16.4505	13.7796	26.0319	15.8335	150.612	31.3627	22.6399	17.5691	12.3977	27.2191	13.9217
159	150.204	35.3571	33.8828	16.5756	13.9695	26.6536	16.0289	150.794	31.048	22.2085	17.4268	12.1832	27.3513	14.0611
160	150.154	35.9416	32.6105	16.6925	13.9673	26.943	16.0866	150.78	30.7328	21.7277	17.3198	11.9637	27.4205	14.2354
161	149.961	36.0213	31.8002	16.6771	14.1072	27.266	16.2594	150.571	30.4505	21.1953	17.2653	11.7749	27.4358	14.4289
162	149.402	36.2442	31.8654	16.4225	14.1165	27.5289	16.3891	150.199	30.2312	20.64	17.269	11.6353	27.4152	14.6188
163	148.988	36.2703	30.7228	16.5571	14.0864	27.8157	16.4702	149.717	30.0942	20.1107	17.3245	11.5419	27.3811	14.7802
164	148.922	36.4631	30.2973	16.6195	14.0251	27.7992	16.4649	149.189	30.0443	19.6624	17.4154	11.4748	27.3536	14.8913
165	147.769	36.2058	30.0165	16.6852	14.0877	27.7648	16.5358	148.675	30.0716	19.3441	17.5191	11.4058	27.3444	14.9372
166	148.293	36.3145	29.9701	16.6733	13.9603	27.627	16.4144	148.226	30.1553	19.189	17.6125	11.3114	27.3525	14.913
167	148.525	36.609	31.4313	16.686	14.2491	27.7343	16.5822	147.882	30.27	19.209	17.6766	11.1818	27.3652	14.8255
168	147.674	36.5772	30.6384	16.6707	14.2138	27.6267	16.6363	147.665	30.3914	19.391	17.7005	11.0265	27.3624	14.6928
169	147.503	36.2056	33.1058	16.3177	13.9704	27.1816	16.5952	147.582	30.5005	19.6992	17.6829	10.8708	27.3237	14.5415
170	147.548	36.3382	33.1177	16.0702	13.827	27.0339	16.6197	147.625	30.5867	20.0826	17.6299	10.748	27.2361	14.4019
171	147.124	35.7181	33.8898	16.0128	13.6583	26.988	16.5995	147.775	30.6475	20.4869	17.5526	10.6866	27.0988	14.3015
172	147.536	35.4211	34.3522	15.9481	13.4707	26.7352	16.5049	148.004	30.6875	20.8714	17.462	10.6998	26.9247	14.2596
173	147.16	35.4621	34.5225	15.825	13.4529	26.6081	16.5781	148.281	30.7166	21.224	17.3664	10.7788	26.7356	14.2823
174	147.889	35.478	34.1288	15.7393	13.3369	26.3725	16.5889	148.579	30.7472	21.5706	17.2704	10.8935	26.5555	14.3628
175	148.641	35.4928	35.0265	15.7292	13.0875	26.0654	16.5655	148.875	30.7915	21.9752	17.1757	10.9999	26.4008	14.4837
176	149.267	35.4684	35.0429	15.632	13.023	25.8296	16.55	149.153	30.8583	22.5256	17.0836	11.0523	26.2747	14.624
177	149.858	35.356	35.7957	15.589	12.9933	25.6524	16.5914	149.401	30.9505	23.3077	16.9973	11.016	26.1648	14.7653
178	150.748	35.2125	34.7578	15.618	12.986	25.558	16.4856	149.602	31.0644	24.3759	16.922	10.8771	26.0479	14.8978
179	151.436	35.1873	36.016	15.3184	12.9814	25.2946	16.6254	149.741	31.1901	25.7293	16.8636	10.6474	25.8985	15.0216
180	152.001	34.9171	37.4542	15.2491	13.0555	25.1685	16.5583	149.796	31.3146	27.2995	16.8247	10.3618	25.7008	15.1445
181	151.105	34.2863	39.974	15.2611	13.0255	25.0878	16.4356	149.756	31.4255	28.9594	16.8013	10.0699	25.4572	15.2767
182	150.911	34.2088	39.2074	15.1787	13.0561	24.9698	16.425	149.622	31.515	30.5492	16.7818	9.82518	25.1913	15.4249
183	149.778	33.9369	38.1544	15.1262	13.3946	24.8804	16.541	149.417	31.5818	31.9155	16.7483	9.67228	24.9428	15.5874
184	150.699	34.1332	37.8682	15.0829	13.385	24.97	16.5482	149.185	31.6312	32.9493	16.6828	9.63792	24.7561	15.754
185	148.562	34.0398	38.976	14.9166	13.5059	24.9362	16.4544	148.981	31.6727	33.6131	16.5734	9.72593	24.6656	15.9085
186	146.552	33.9961	37.6269	15.0813	13.7079	24.931	16.3717	148.85	31.7186	33.9449	16.4195	9.91809	24.6839	16.0343
187	145.948	34.2427	37.909	14.8433	13.7991	24.8508	16.3884	148.812	31.7823	34.0383	16.2317	10.1808	24.7982	16.1204
188	144.413	33.9418	38.9465	14.7536	14.1269	24.6857	16.2925	148.838	31.8791	34.0037	16.0271	10.4756	24.9758	16.1651
189	144.036	33.8188	37.9076	14.6797	14.1521	24.6758	16.2288	148.845	32.0275	33.9235	15.8195	10.7711	25.1777	16.1763
190	142.496	34.0802	37.6861	14.7337	14.2528	24.7183	16.2088	148.707	32.25	33.8193	15.6114	11.0519	25.3737	16.1679
191	141.898	34.166	37.1325	14.7885	14.2926	24.6278	16.001	148.277	32.5703	33.6434	15.3898	11.3228	25.5543	16.154
192	139.707	34.5361	35.6086	14.7245	14.4054	24.7997	15.9145	147.413	33.0071	33.3021	15.1302	11.6045	25.7326	16.1429
193	137.146	34.4291	38.2069	14.5167	14.5533	24.9512	15.8917	146.006	33.5655	32.7059	14.8088	11.9239	25.9354	16.1333
194	135.377	34.2386	37.3095	14.6714	14.6111	24.871	15.8269	144.004	34.2279	31.8303	14.4178	12.3003	26.1877	16.1131
195	134.228	34.444	37.3442	14.7316	14.7376	25.0304	15.5706	141.421	34.9508	30.7626	13.9783	12.7328	26.4964	16.0636
196	132.416	33.9002	38.8529	14.784	14.6313	24.8087	15.6341	138.328	35.6668	29.7158	13.543	13.1939	26.8405	15.965
197	130.928	34.6514	38.287	14.8682	14.7941	24.9412	15.4473	134.847	36.2959	28.9965	13.1874	13.632	27.1724	15.8044
198	128.682	34.7855	38.2536	14.8619	14.7917	24.9516	15.4041	131.13	36.7608	28.932	12.9899	13.9834	27.4297	15.5813
199	128.499	34.8497	37.4063	14.8548	14.8024	24.9817	15.3939	127.345	37.0025	29.7774	13.0077	14.1888	27.5533	15.3105
200	126.562	35.0462	37.0616	14.7966	14.9013	25.0548	15.3036	123.664	36.9916	31.6324	13.2576	14.2098	27.5049	15.0206
201	124.116	34.9093	36.9488	14.813	14.8487	25.1278	15.2277	120.247	36.731	34.3963	13.7084	14.0406	27.2769	14.7487
202	123.265	35.1355	35.1112	14.9288	14.8195	24.9658	15.0667	117.238	36.2509	37.7794	14.288	13.7093	26.8927	14.5313
203	122.065	35.1476	35.3916	14.9977	14.8579	24.8758	15.1574	114.747	35.5984	41.37	14.9032	13.2693	26.3981	14.3958
204	122.39	35.3557	33.8667	15.2235	14.7842	24.8236	14.9547	112.84	34.8258	44.736	15.4636	12.7853	25.8475	14.3527
205	121.989	35.509	32.3908	15.2858	14.7067	24.765	14.8596	111.529	33.9823	47.5292	15.9038	12.3163	25.2916	14.3919
206	119.909	35.4756	31.5384	15.4473	14.6706	24.6748	14.9141	110.768	33.1107	49.5605	16.1938	11.9029	24.7686	14.4844
207	118.131	35.7364	32.0305	15.3895	14.7829	24.7836	14.9582	110.466	32.2479	50.8239	16.3381	11.5616	24.3028	14.5894
208	117.277	35.435	32.085	15.3092	14.7586	24.7034	15.1297	110.505	31.4282	51.4659	16.3653	11.2878	23.9055	14.6635
209	117.181	35.7694	31.9821	15.3648	14.7252	24.7187	15.1291	110.765	30.6848	51.7155	16.3139	11.0642	23.5788	14.6732
210	118.585	35.4539	32.3656	15.5949	14.461	24.6972	15.1094	111.149	30.0478	51.8022	16.2196	10.8721	23.3178	14.6025
211	118.043	35.3795	33.1803	15.7522	14.2837	24.6497	15.1029	111.609	29.5402	51.888	16.1097	10.7	23.1118	14.4584
212	119.294	35.5723	32.2568	15.7329	13.9937	24.5058	15.0755	112.149	29.1729	52.0337	16.0023	10.5481	22.9444	14.268
213	118.808	35.435	32.2378	15.9479	13.801	24.4468	15.0799	112.823	28.9414	52.2038	15.9098	10.4262	22.7954	14.0712
214	120.818	35.6747	31.6889	16.0319	13.6483	24.4691	15.0879	113.714	28.828	52.3005	15.842	10.3479	22.6445	13.9088
215	120.973	35.4861	32.3801	16.1908	13.4013	24.4193	15.057	114.921	28.8065	52.2101	15.8066	10.3223	22.4764	13.8111
216	123.6	34.8496	33.9393	16.3749	13.2423	24.3143	14.8791	116.53	28.8512	51.8417	15.8078	10.3482	22.286	13.7893
217	124.345	34.3813	33.4337	16.3655	12.903	24.079	14.8229	118.601	28.9437	51.149	15.8431	10.4125	22.08	13.834
218	124.559	34.3576	33.6314	16.3898	12.6224	24.042	14.7719	121.154	29.0771	50.1315	15.9034	10.4943	21.8748	13.9192
219	127.818	34.6836	33.4464	16.2781	12.305	23.6243	14.7501	124.161	29.2556	48.8218	15.9758	10.5726	21.6909	14.0123
220	131.578	34.1591	33.6445	16.4425	12.1506	23.2851	14.6848	127.545	29.4892	47.2689	16.0495	10.6355	21.546	14.0855
221	134.562	34.3329	32.8518	16.4706	11.8396	23.2743	14.6471	131.182	29.7875	45.5262	16.1216	10.686	21.4496	14.125
222	135.94	34.193	32.3407	16.5271	11.8034	23.1427	14.5218	134.914	30.1533	43.6479	16.2004	10.7428	21.4016	14.1348
223	139.73	34.4256	29.4843	16.4767	11.9542	23.1283	14.6672	138.558	30.5793	41.6908	16.3027	10.8342	21.3946	14.1336
224	141.939	34.5496	28.1094	16.6153	11.9269	23.0335	14.4363	141.935	31.0493	39.7163	16.4469	10.9877	21.42	14.1471
225	144.197	34.622	26.9319	16.5912	11.9284	23.0714	14.4197	144.886	31.5417	37.7879	16.6436	11.2187	21.473	14.1975
226	145.878	34.7299	25.8505	16.6048	12.0905	23.3166	14.4274	147.3	32.0357	35.961	16.8888	11.5229	21.5559	14.2954
227	146.731	35.3797	23.6085	16.7227	12.4895	23.5468	14.5754	149.125	32.5159	34.2689	17.1629	11.8772	21.6773	14.436
228	149.281	35.8899	21.5671	16.6945	12.7044	23.7444	14.7502	150.372	32.9752	32.712	17.4355	12.2465	21.8484	14.6012
229	150.539	36.0831	20.855	16.8545	13.0657	23.5959	14.9291	151.111	33.4147	31.2553	17.6755	12.5964	22.078	14.7671
230	151.158	34.929	22.2136	16.9046	13.3054	23.6822	14.9656	151.452	33.8402	29.8396	17.8606	12.9059	22.3683	14.9122
231	152.092	35.4082	20.3288	16.945	13.6165	24.0367	15.0047	151.528	34.2576	28.4026	17.9842	13.1738	22.7132	15.0252
232	152.228	35.9525	19.8378	16.9552	13.8717	24.4226	15.2018	151.466	34.6686	26.9022	18.0551	13.4168	23.1	15.1078
233	152.741	36.2968	20.6067	16.9895	14.0978	25.0482	15.5255	151.37	35.0689	25.3339	18.0924	13.6601	23.5131	15.1735
234	152.192	37.2956	18.7897	16.9814	14.4818	25.7845	15.7852	151.306	35.4495	23.7347	18.1166	13.9239	23.9383	15.2421
235	152.606	37.5979	18.1647	17.166	14.7236	26.5128	15.8592	151.297	35.8012	22.1723	18.1427	14.2115	24.3662	15.3323
236	152.325	38.1171	17.3421	17.2372	14.9892	27.0297	16.1319	151.315	36.1209	20.7226	18.1766	14.5049	24.7928	15.4559
237	150.692	38.2662	15.2749	17.2928	15.1496	27.9479	16.1794	151.298	36.4171	19.4425	18.2177	14.77	25.2181	15.6146
238	149.669	38.7947	15.7006	17.3444	15.3594	28.2582	16.3118	151.172	36.7118	18.3513	18.2646	14.9699	25.6427	15.8
239	149.579	40.433	15.1916	17.6529	15.5919	29.0223	16.552	150.88	37.0369	17.4245	18.319	15.0819	26.0643	15.9967
240	148.215	40.7542	15.1542	17.7001	15.7815	29.2294	16.5642	150.414	37.4259	16.6029	18.3878	15.1094	26.4743	16.1878
241	147.322	41.484	13.3956	17.9584	16.0996	29.3264	16.6941	149.832	37.9032	15.8121	18.4795	15.0859	26.8573	16.3582
242	145.457	41.7343	13.32	18.0543	16.3137	29.249	16.749	149.257	38.4749	14.9872	18.5981	15.0658	27.1923	16.4978
243	144.623	41.7491	13.1456	18.1466	16.6278	29.1993	16.8451	148.843	39.124	14.091	18.7375	15.1076	27.4572	16.6012
244	144.252	41.9979	12.5796	18.1879	16.6362	28.7856	16.7335	148.731	39.8135	13.1218	18.8799	15.2534	27.6339	16.6666
245	145.015	42.232	12.2285	18.4232	16.774	28.7019	16.7693	149.006	40.4944	12.1099	18.999	15.5138	27.7129	16.6932
246	143.737	42.6989	12.1696	18.5862	16.9208	28.3709	16.7532	149.662	41.1182	11.1047	19.0685	15.8637	27.6962	16.6807
247	144.614	43.1243	11.1271	18.7274	17.0152	27.969	16.8496	150.615	41.6475	10.1587	19.0704	16.2502	27.5964	16.6295
248	145.995	43.7568	10.0935	18.8914	17.1732	27.5084	16.8368	151.734	42.0627	9.31495	19.0003	16.6102	27.433	16.5427
249	147.69	44.3003	9.90178	19.0548	17.1111	27.2382	16.9481	152.901	42.3636	8.60291	18.8667	16.8901	27.2254	16.4283
250	149.532	44.3485	8.69821	19.3316	16.9346	26.88	16.8805	154.057	42.5656	8.04101	18.6848	17.0605	26.988	16.3002
251	151.168	44.6233	7.99357	19.3691	16.8722	26.5177	16.8085	155.222	42.695	7.64284	18.4669	17.1199	26.7263	16.1768
252	153.922	44.8176	8.66445	19.1986	16.6203	26.1708	16.6618	156.468	42.7834	7.42152	18.2152	17.0866	26.4393	16.0767
253	154.869	44.8134	8.69961	19.096	16.3342	25.8304	16.5581	157.86	42.8636	7.38844	17.92	16.9847	26.1245	16.0128
254	155.829	44.9784	9.20313	18.846	15.9843	25.7011	16.4718	159.395	42.9663	7.5454	17.5646	16.8301	25.7868	15.9877
255	157.179	44.9551	8.77904	18.8009	15.7799	25.4441	16.4985	160.956	43.1147	7.87394	17.1349	16.6233	25.4441	15.9913
256	158.987	45.2248	7.73716	18.6031	15.3626	25.2567	16.3445	162.317	43.3166	8.32952	16.6299	16.3535	25.1301	16.0041
257	160.436	45.007	7.96941	18.322	15.0916	25.1417	16.3142	163.195	43.5564	8.84833	16.0684	16.0118	24.8882	16.0033
258	161.575	45.0116	7.53732	18.0565	14.9386	25.1634	16.1062	163.331	43.7891	9.3704	15.4894	15.6054	24.7602	15.9717
259	161.229	45.0457	7.52011	17.2255	14.68	25.2439	15.9927	162.555	43.9411	9.87575	14.9463	15.1667	24.7722	15.9037
260	159.914	45.2822	9.45381	16.6939	14.4811	25.4177	15.7866	160.837	43.9218	10.4223	14.4964	14.7497	24.9227	15.8076
261	159.152	45.6029	10.1929	16.1772	14.313	25.5282	15.6158	158.264	43.6442	11.1687	14.1896	14.4143	25.1783	15.7015
262	156.461	45.7707	12.6764	15.1488	13.9402	25.5629	15.5969	154.994	43.0499	12.366	14.0592	14.2037	25.4795	15.6048
263	154.597	45.9716	13.903	14.2736	13.8693	25.6268	15.5196	151.195	42.13	14.31	14.1168	14.1244	25.7551	15.5296
264	150.735	45.5006	17.4649	13.5848	13.8255	25.9049	15.4129	146.997	40.9344	17.2627	14.3504	14.138	25.9409	15.4737
265	146.027	45.6403	18.874	13.142	13.708	25.7791	15.1963	142.494	39.5634	21.3616	14.7274	14.1688	25.9963	15.4211
266	141.292	45.0599	23.129	13.0782	13.3934	25.705	15.1526	137.774	38.1449	26.5466	15.1983	14.1275	25.9131	15.347
267	136.144	43.5299	27.1268	13.2257	13.2009	25.4674	15.0819	132.967	36.802	32.5326	15.704	13.9406	25.7141	15.2283
268	130.769	42.6241	30.693	13.3118	12.8367	25.428	14.7219	128.279	35.6236	38.8423	16.1837	13.5756	25.442	15.0523
269	125.993	41.4652	35.9919	13.5801	12.3752	25.2604	14.346	123.983	34.6462	44.8958	16.5847	13.0527	25.1433	14.8228
270	121.512	39.1532	40.2453	14.3762	12.077	24.9163	13.8998	120.369	33.854	50.1351	16.8715	12.4383	24.8538	14.5589
271	118.318	38.1831	45.0247	14.6884	11.7319	24.6026	13.4718	117.672	33.1945	54.1455	17.032	11.8228	24.5902	14.2894
272	116.22	36.978	47.5495	14.8602	11.7214	24.3281	13.3132	116.004	32.6047	56.74	17.0788	11.2923	24.3498	14.0433
273	116.452	36.3009	46.7303	15.172	11.7306	24.1717	13.1936	115.326	32.036	57.9814	17.0441	10.9035	24.118	13.8413
274	117.65	35.6968	50.1402	15.6769	11.3499	23.9444	13.0467	115.471	31.4711	58.1397	16.9691	10.6712	23.8791	13.6919
275	118.558	34.9021	51.2062	15.6822	11.344	23.8217	12.941	116.202	30.9267	57.6016	16.8909	10.5708	23.6258	13.5905
276	117.812	33.6915	51.6633	15.7374	11.347	23.6961	13.0959	117.289	30.4428	56.7617	16.8315	10.5542	23.3637	13.5248
277	119.19	33.0165	51.1458	15.671	11.4291	23.4816	12.9556	118.574	30.0657	55.9291	16.7922	10.571	23.1101	13.4799
278	121.092	32.4937	51.106	15.6418	11.2084	23.1616	13.0425	119.987	29.8294	55.2725	16.7555	10.5873	22.8884	13.4447
279	123.439	32.4302	49.3398	15.7394	11.3243	23.0774	12.9985	121.538	29.7445	54.8124	16.6941	10.596	22.7198	13.414
280	125.371	31.7982	47.1303	15.9462	11.4348	22.735	13.0638	123.267	29.795	54.4536	16.5834	10.6159	22.6168	13.3885
281	128.274	31.6027	45.5565	15.9133	11.6475	22.5948	13.0386	125.205	29.9456	54.0399	16.413	10.6813	22.5795	13.3731
282	130.29	31.3015	45.2133	15.9138	11.6373	22.5299	12.9548	127.34	30.1521	53.4114	16.1925	10.8272	22.5958	13.3734
283	133.731	31.4135	43.8601	15.9644	11.8513	22.3798	12.9753	129.622	30.3737	52.447	15.951	11.0749	22.6444	13.3937
284	135.884	31.5859	42.3436	16.0578	12.0084	22.3332	12.9555	131.983	30.5816	51.0863	15.7288	11.4234	22.7003	13.436
285	138.653	31.4656	40.9539	15.999	12.1997	22.1012	13.1337	134.363	30.7632	49.331	15.5669	11.8482	22.7405	13.5004
286	140.664	31.3756	39.6348	16.1055	12.2888	22.1553	13.2447	136.732	30.9207	47.2319	15.4956	12.3077	22.7499	13.5857
287	143.082	30.8912	41.5521	16.2056	12.2902	22.1825	13.2632	139.089	31.0673	44.87	15.5274	12.7549	22.7255	13.6907
288	144.554	30.9627	38.4052	16.1106	12.8427	22.2129	13.3995	141.449	31.2223	42.3381	15.6554	13.1496	22.6782	13.8147
289	145.442	30.3551	37.3367	16.0691	12.977	22.1603	13.483	143.815	31.4055	39.7271	15.8575	13.4692	22.6329	13.9569
290	146.589	31.5954	33.6046	16.1175	13.216	22.4727	13.6045	146.159	31.6343	37.1184	16.1033	13.7135	22.624	14.1166
291	148.422	31.8457	31.1823	16.0558	13.3527	22.3117	13.5457	148.406	31.9202	34.5804	16.3619	13.9039	22.6883	14.2921
292	150.234	32.0856	28.9676	16.1801	13.4012	22.5893	13.6922	150.449	32.2668	32.1692	16.6081	14.0748	22.8566	14.4805
293	150.702	32.2725	25.2982	16.2629	13.8467	22.979	13.9755	152.163	32.6693	29.9295	16.8245	14.262	23.1457	14.6783
294	150.853	33.2129	24.1484	16.2012	13.8237	23.4899	14.0582	153.427	33.1147	27.8936	17.0021	14.4912	23.5538	14.8821
295	150.445	33.1694	23.018	16.2609	13.9904	23.734	14.3109	154.154	33.5848	26.0803	17.138	14.7698	24.0606	15.0895
296	149.391	33.329	23.1951	16.3587	14.0863	24.0854	14.5003	154.302	34.0603	24.4901	17.2337	15.0861	24.6318	15.3001
297	149.711	33.9109	22.178	16.4486	14.0697	24.4573	14.666	153.88	34.527	23.1008	17.2952	15.4136	25.2275	15.5159
298	149.578	34.5258	19.7935	16.6963	14.4356	25.1153	15.0767	152.945	34.9817	21.8663	17.3342	15.7214	25.8114	15.7394
299	150.594	34.955	18.8295	16.9195	14.5654	25.4983	15.3715	151.599	35.434	20.721	17.3677	15.9841	26.3567	15.9718
300	149.521	35.587	18.6358	17.1316	14.7589	25.6998	15.5834	149.982	35.9053	19.5903	17.4162	16.1887	26.8479	16.2106
301	148.614	36.3045	17.2967	17.2737	15.1121	26.4054	15.825	148.264	36.4217	18.4051	17.499	16.3364	27.2784	16.4473
302	147.501	36.5614	17.1691	17.4484	15.3547	26.826	15.9857	146.636	37.0044	17.1175	17.6273	16.438	27.6445	16.6674
303	147.675	37.0733	17.2438	17.3743	15.2061	27.1824	15.974	145.287	37.6597	15.7126	17.7996	16.5077	27.9402	16.8518
304	145.254	37.0171	16.2438	17.4752	15.4069	27.5794	16.3864	144.384	38.3732	14.2115	17.9997	16.5571	28.1543	16.981
305	144.014	37.4241	16.3199	17.6604	15.7	28.0175	16.7397	144.036	39.1097	12.6671	18.2011	16.5926	28.2727	17.0401
306	143.094	37.8021	15.1304	18.0043	16.0252	28.1836	17.0926	144.275	39.8212	11.1515	18.3758	16.6178	28.283	17.0234
307	143.065	38.3822	14.7189	18.1661	16.2514	28.2972	17.2369	145.036	40.4589	9.74179	18.5041	16.6369	28.1818	16.9369
308	143.38	38.6939	14.3087	18.1639	16.3601	28.1205	17.4167	146.178	40.9864	8.50535	18.5807	16.6576	27.9804	16.7983
309	144.235	38.782	13.8897	18.0936	16.5456	28.1428	17.337	147.52	41.3892	7.49053	18.6132	16.6907	27.7056	16.6332
310	143.66	38.9014	13.0463	18.3578	16.8717	28.0076	17.4768	148.896	41.6768	6.72197	18.6127	16.7454	27.3959	16.4704
311	145.47	39.6697	12.1387	18.2665	16.8034	27.5928	17.4833	150.208	41.8771	6.19988	18.5809	16.8221	27.0926	16.3354
312	146.493	40.6598	11.6021	18.1663	16.8345	27.435	17.5463	151.444	42.0271	5.90241	18.5002	16.9071	26.8296	16.2455
313	145.211	40.1728	12.2069	17.8417	16.9298	27.1769	17.636	152.662	42.1611	5.79058	18.333	16.9716	26.6251	16.2074
314	146.445	41.5943	10.5306	16.9969	16.9108	26.7627	17.5024	153.924	42.3035	5.81546	18.0338	16.9785	26.4782	16.2172
315	147.876	42.185	9.44972	16.6444	16.9032	26.405	17.6477	155.227	42.4658	5.9276	17.5697	16.8927	26.371	16.2632
316	148.311	42.619	9.5247	15.9354	17.1448	26.3717	17.6399	156.437	42.649	6.08762	16.9416	16.6942	26.2767	16.3312
317	148.953	42.604	8.94052	15.3615	16.9045	26.1149	17.5923	157.289	42.8473	6.2757	16.1951	16.3869	26.1705	16.409
318	149.856	43.1544	9.33856	14.6466	16.7587	25.7648	17.4349	157.448	43.0506	6.49622	15.415	16.0012	26.0385	16.4906
319	149.671	43.9728	8.66399	13.8189	16.4429	25.8293	17.399	156.62	43.2442	6.77392	14.7019	15.5875	25.8832	16.577
320	148.322	43.9985	9.10335	13.4545	16.2768	25.6172	17.3534	154.674	43.4061	7.14069	14.1399	15.2054	25.722	16.6744
321	146.737	43.7268	9.2962	13.0702	16.1626	25.5285	17.2596	151.729	43.5036	7.61642	13.7667	14.9096	25.5802	16.7901
322	145.625	43.1508	11.0243	12.5946	15.8449	25.4407	17.2983	148.141	43.4942	8.19079	13.5612	14.7389	25.4814	16.9272
323	143.35	42.8189	11.5111	12.4384	15.7758	25.3535	17.3414	144.415	43.3319	8.81416	13.4527	14.709	25.4374	17.0798
324	142.678	42.0034	12.5724	12.3997	15.7947	25.3054	17.0822	141.047	42.9777	9.4045	13.3509	14.812	25.4426	17.2315
325	141.061	42.1397	12.6254	12.2431	15.78	25.3431	16.9908	138.359	42.4131	9.87203	13.1852	15.0192	25.4742	17.3578
326	137.088	41.3028	13.6495	12.7352	15.7199	25.3522	16.7741	136.403	41.6493	10.1551	12.9357	15.2873	25.4991	17.431
327	133.67	40.5913	15.8727	12.6423	15.6518	25.2568	16.5995	134.959	40.7301	10.2548	12.6452	15.5651	25.4834	17.4275
328	130.585	39.7507	17.2019	12.8928	15.6369	25.1441	16.5118	133.635	39.725	10.255	12.4047	15.8014	25.404	17.3349
329	127.735	39.0828	17.057	12.8275	15.8373	25.1981	16.6462	132.032	38.7147	10.3152	12.3207	15.9518	25.2556	17.1545
330	125.912	38.5631	20.4557	13.3636	15.7345	25.2848	16.4062	129.902	37.7737	10.6373	12.4742	15.9853	25.0522	16.9017
331	123.779	37.7915	22.1894	13.6731	15.6714	25.3017	16.2145	127.233	36.9545	11.4114	12.89	15.8887	24.8228	16.6002
332	121.339	36.9493	22.2896	14.0741	15.6027	25.1947	16.1216	124.252	36.2798	12.7602	13.5258	15.6675	24.6027	16.2759
333	118.551	36.0884	25.5394	14.5688	15.5546	25.0031	15.8181	121.324	35.7423	14.6996	14.2862	15.3434	24.422	15.9497
334	117.481	35.2703	27.1536	15.0529	15.4105	24.9397	15.6807	118.823	35.3133	17.1299	15.0529	14.9478	24.2973	15.6344
335	116.159	34.7774	28.773	15.4557	15.3798	24.8255	15.4047	117.012	34.9555	19.8601	15.7199	14.514	24.227	15.3338
336	115.511	33.5369	30.8017	15.7379	15.2509	24.5386	15.2826	115.983	34.6349	22.6579	16.2205	14.0709	24.193	15.047
337	113.808	33.4573	32.5268	15.8159	15.2982	24.5179	15.0204	115.681	34.3302	25.3059	16.5371	13.6408	24.1671	14.7725
338	113.117	33.481	32.5007	15.8638	15.2179	24.5914	14.7204	115.97	34.0349	27.6449	16.6938	13.2416	24.1205	14.5131
339	113.658	33.3145	33.832	15.9399	15.2287	24.5092	14.5015	116.715	33.7555	29.5901	16.7365	12.8921	24.0335	14.2772
340	113.573	32.9821	32.706	15.913	15.2183	24.5613	14.4293	117.844	33.5053	31.1192	16.7118	12.6157	23.9005	14.0776
341	113.132	32.242	36.6091	16.0701	14.8156	24.3708	14.0312	119.351	33.2977	32.2405	16.6519	12.4407	23.7321	13.9284
342	115.971	32.4621	36.4686	16.1924	14.6542	24.1266	13.8223	121.261	33.1403	32.9604	16.5712	12.3944	23.5499	13.8404
343	118.639	32.6719	35.5779	16.2269	14.4796	23.8417	13.6409	123.575	33.0325	33.2637	16.4715	12.4924	23.3798	13.8179
344	120.711	32.3119	36.8063	16.1913	14.3328	23.6906	13.565	126.233	32.9662	33.1177	16.3529	12.7286	23.2439	13.8575
345	123.8	32.1779	36.4448	16.1596	14.0994	23.5681	13.466	129.107	32.9285	32.4958	16.2223	13.0697	23.1548	13.9489
346	125.278	31.9856	35.1904	16.1858	14.0852	23.5759	13.4594	132.031	32.9074	31.408	16.0965	13.4587	23.1148	14.0773
347	127.611	32.0119	35.618	16.1432	13.8725	23.5396	13.3583	134.851	32.8972	29.922	15.9984	13.8285	23.1195	14.2271
348	128.533	31.2821	34.2958	16.1253	13.7625	23.4648	13.5438	137.461	32.9025	28.1635	15.9494	14.1197	23.1648	14.3848
349	132.08	31.507	32.4906	16.1698	13.7828	23.4291	13.5857	139.821	32.9393	26.2931	15.9609	14.2992	23.2529	14.5418
350	134.259	31.41	31.1109	16.2511	13.8027	23.4945	13.6901	141.937	33.0329	24.4692	16.0309	14.3696	23.3971	14.6955
351	138.06	31.9675	28.0623	16.259	14.0818	23.8699	13.973	143.828	33.2116	22.8098	16.1443	14.3683	23.6196	14.8494
352	139.717	32.4155	26.8934	16.1771	14.3575	24.29	14.3052	145.489	33.4986	21.3704	16.2783	14.3548	23.9454	15.0124
353	141.248	33.2171	25.1037	16.1218	14.345	24.4774	14.4536	146.878	33.9041	20.1434	16.4087	14.3907	24.3929	15.196
354	142.871	33.6572	23.9053	16.1954	14.3935	24.698	14.7959	147.922	34.4191	19.0783	16.517	14.52	24.9636	15.4112
355	145.357	34.1794	21.9005	15.9824	14.598	25.186	15.1103	148.55	35.0155	18.1119	16.594	14.7571	25.6373	15.6647
356	145.678	34.6271	22.2004	15.9933	14.8136	25.507	15.1302	148.722	35.6512	17.1938	16.641	15.0842	26.3712	15.9562
357	145.684	35.0793	20.0479	16.1103	15.189	26.1125	15.6625	148.46	36.2802	16.2994	16.6687	15.4596	27.1075	16.2773
358	146.537	36.0255	18.3822	16.2597	15.4155	26.6348	15.9799	147.842	36.8647	15.4262	16.6953	15.8321	27.7845	16.6117
359	146.875	36.4663	17.0319	16.5056	15.6408	27.262	16.2224	146.987	37.3849	14.5799	16.742	16.1564	28.3502	16.9393
360	147.504	37.5027	15.5719	16.6213	15.8392	27.6568	16.5722	146.025	37.8431	13.759	16.829	16.404	28.7718	17.2401
361	145.442	38.0563	14.7334	16.672	16.0602	27.9602	16.8849	145.07	38.2609	12.9474	16.9697	16.5671	29.0402	17.4983
362	146.664	38.6528	14.0323	16.9772	16.378	28.4979	17.0799	144.205	38.6702	12.1189	17.167	16.6548	29.1682	17.7058
363	146.209	39.2112	12.2344	17.2127	16.6013	28.678	17.233	143.482	39.1004	11.2506	17.4102	16.6857	29.1819	17.8616
364	145.328	39.9738	11.8326	17.4612	16.6521	28.6728	17.3216	142.929	39.5668	10.338	17.6764	16.6795	29.1103	17.9709
365	145.832	40.2455	11.4942	17.6816	16.8004	28.5048	17.3473	142.571	40.064	9.40388	17.9349	16.6519	28.976	18.0411
366	144.728	40.8156	11.0874	17.9652	16.9652	28.6627	17.6221	142.431	40.5666	8.49487	18.1559	16.6126	28.7901	18.0792
367	144.464	41.1754	10.3722	18.2051	17.1934	28.4672	17.7822	142.538	41.0368	7.6683	18.3189	16.5681	28.5532	18.0887
368	144.546	41.4761	10.591	18.3797	17.3546	28.3272	17.8467	142.915	41.4359	6.97289	18.4183	16.5245	28.2616	18.0703
369	144.133	42.2037	9.57725	18.6354	17.3752	28.0063	17.8384	143.565	41.7364	6.43252	18.4643	16.4896	27.9155	18.0225
370	143.219	42.2951	9.07873	18.8159	17.4506	27.7836	17.9807	144.467	41.9301	6.04017	18.4769	16.4735	27.5264	17.9448
371	143.021	42.7622	8.18742	18.9853	17.6397	27.2684	17.9405	145.574	42.0305	5.7643	18.4765	16.4853	27.1199	17.8397
372	143.818	43.3594	8.79787	19.092	17.7248	27.1377	17.8851	146.819	42.0692	5.56468	18.4731	16.5301	26.7325	17.7147
373	144.807	43.7348	8.57847	19.1763	17.9564	26.8089	17.8993	148.129	42.0883	5.41085	18.4595	16.6051	26.4029	17.5818
374	146.172	44.7559	8.38498	18.9882	17.9217	26.693	17.902	149.441	42.1305	5.29522	18.4118	16.699	26.1626	17.4548
375	147.374	45.1666	7.60793	18.7989	17.9039	26.5425	17.987	150.705	42.2315	5.23509	18.2963	16.7928	26.0271	17.3457
376	147.775	44.914	7.60293	18.697	17.7031	26.3653	17.9098	151.881	42.4138	5.26279	18.0813	16.8637	25.9925	17.2607
377	148.307	45.2671	7.51056	18.4142	17.6644	26.2864	17.9678	152.924	42.6844	5.40853	17.7494	16.8905	26.0389	17.1989
378	149.232	45.0183	7.91221	18.1512	17.5936	26.2801	17.8964	153.768	43.0348	5.68393	17.3047	16.8578	26.1381	17.153
379	148.989	44.7851	7.71719	17.7402	17.3265	26.2296	18.1273	154.316	43.4429	6.07423	16.773	16.76	26.263	17.1144
380	148.821	44.6741	7.28015	17.2525	17.1891	26.074	18.2328	154.44	43.8764	6.54292	16.1957	16.6021	26.3955	17.0793
381	149.747	44.807	6.70632	16.6689	17.1428	25.9819	18.5568	154.004	44.2966	7.04648	15.6183	16.3992	26.5281	17.0548
382	150.664	45.4234	7.11013	16.2548	17.1125	26.059	18.7307	152.896	44.6631	7.55182	15.0792	16.1729	26.6606	17.0605
383	150.778	45.3624	6.70543	15.5976	17.0282	26.0538	19.1525	151.076	44.9388	8.04696	14.6024	15.9473	26.7927	17.1248
384	150.362	45.5739	6.28493	15.0633	16.7726	26.0483	19.1098	148.61	45.0941	8.5382	14.1951	15.7446	26.9177	17.2755
385	149.388	45.5654	5.93211	14.3772	16.8242	26.1625	19.5908	145.681	45.1098	9.03312	13.8513	15.5808	27.0186	17.5284
386	148.468	45.6125	5.55993	13.7333	16.7711	26.1796	19.8445	142.57	44.9782	9.51652	13.558	15.4647	27.071	17.8766
387	147.096	45.7669	5.32373	13.172	16.8415	26.3659	19.9506	139.604	44.7015	9.93222	13.3015	15.3969	27.0514	18.2875
388	145.561	44.7968	5.42172	12.7428	16.8622	26.4786	20.0858	137.088	44.2902	10.1829	13.0721	15.3734	26.9464	18.708
389	144.284	45.0506	5.05652	12.3315	17.0615	26.6135	20.2006	135.229	43.7597	10.153	12.8649	15.388	26.761	19.0789
390	142.429	44.8757	5.03643	12.1343	17.0834	26.6705	20.2943	134.096	43.1284	9.74787	12.6791	15.4366	26.5197	19.3518
391	141.649	44.4435	4.91824	12.241	17.0595	26.6464	20.2172	133.603	42.4163	8.9358	12.5155	15.5192	26.2614	19.5054
392	140.358	44.679	5.87428	11.7755	17.1716	26.7702	20.1562	133.546	41.6452	7.77365	12.3745	15.6398	26.0289	19.5514
393	139.528	43.8231	5.26746	11.6962	17.3474	26.7996	20.2037	133.668	40.8386	6.40321	12.2563	15.8031	25.8569	19.5306
394	138.422	42.8456	5.53889	11.9218	17.2164	26.6038	20.0872	133.731	40.0209	5.01579	12.1616	16.0115	25.7627	19.4985
395	137.872	42.1847	5.21037	11.6448	17.554	26.7418	19.9511	133.581	39.216	3.79578	12.0924	16.2608	25.7446	19.5059
396	135.448	40.7003	5.08885	11.715	17.5677	26.4342	19.6929	133.174	38.4455	2.86397	12.0526	16.5382	25.7851	19.5821
397	134.025	39.8647	4.51065	11.8841	17.5062	26.3928	19.6518	132.569	37.7255	2.24219	12.0471	16.8228	25.8602	19.7263
398	134.157	38.6303	4.18074	11.8489	17.5879	26.2418	19.5416	131.884	37.066	1.8524	12.0797	17.0897	25.9488	19.9092
399	133.889	38.0487	4.73212	11.8585	17.5531	26.4018	19.2833	131.238	36.4697	1.54994	12.1519	17.3152	26.0389	20.0849
400	133.965	37.2406	3.84089	11.7946	17.5721	26.2971	19.2712	130.706	35.9339	1.17737	12.2612	17.482	26.1291	20.2058
401	134.529	36.7307	3.40833	12.1911	17.6067	26.3015	18.9649	130.292	35.4514	0.618523	12.401	17.583	26.2251	20.2375
402	133.718	36.4379	3.56919	11.9677	17.6738	26.431	19.1915	129.94	35.0128	-0.166779	12.5616	17.6213	26.3335	20.1667
403	132.685	35.4898	3.93719	12.0482	17.5934	26.211	19.1691	129.563	34.6073	-1.13733	12.7316	17.6084	26.4566	20.002
404	132.494	34.4744	3.96703	12.1696	17.6214	26.0787	18.9984	129.09	34.2231	-2.1926	12.8989	17.5599	26.5886	19.7686
405	132.234	33.5492	4.55433	12.3004	17.6036	26.052	19.0011	128.494	33.8468	-3.21005	13.0524	17.4914	26.7171	19.5002
406	131.073	32.9155	6.28539	12.3409	17.5631	25.9151	18.9683	127.81	33.4624	-4.08193	13.1832	17.415	26.8251	19.2308
407	132.428	32.2503	7.42668	12.7881	17.3228	25.7746	18.7657	127.115	33.0513	-4.73965	13.2853	17.338	26.8957	18.9895
408	131.449	31.3525	7.25531	13.1006	17.3879	25.6656	18.5478	126.498	32.5925	-5.16102	13.3568	17.2625	26.9155	18.7969
409	129.48	30.4466	8.73288	13.0224	17.3869	25.5367	18.6661	126.023	32.0657	-5.36305	13.4008	17.1867	26.8765	18.6643
410	128.852	29.5262	9.48793	13.0548	17.3931	25.5765	18.5764	125.707	31.4552	-5.38697	13.424	17.1057	26.7778	18.5925
411	128.79	28.3661	10.9245	13.4761	17.4865	25.3546	18.4247	125.511	30.7551	-5.28264	13.4359	17.0127	26.6259	18.5719
412	127.471	27.9158	11.9262	13.6884	17.3156	25.3525	18.2809	125.364	29.9744	-5.09664	13.4461	16.9002	26.4354	18.5833
413	126.459	27.6388	14.3385	13.578	17.1633	25.2448	18.132	125.193	29.14	-4.86478	13.4624	16.7618	26.2286	18.6005
414	126.552	27.0938	15.5608	13.7984	17.0164	25.1594	17.8971	124.951	28.2956	-4.60713	13.4899	16.5942	26.0334	18.5957
415	125.646	25.7654	16.711	13.8098	17.0242	25.1294	17.7303	124.64	27.4961	-4.32417	13.5314	16.4002	25.8792	18.5452
416	125.516	25.8467	17.8125	14.0932	16.7845	25.0523	17.5763	124.307	26.7978	-3.9957	13.5896	16.1902	25.7905	18.4356
417	125.629	25.3188	19.8023	14.0941	16.6638	25.0217	17.3412	124.024	26.2464	-3.58462	13.6685	15.9821	25.78	18.2666
418	125.735	25.1372	21.3811	14.1415	16.466	25.0788	17.1702	123.861	25.8661	-3.04697	13.7743	15.7986	25.8447	18.0506
419	126.104	24.5362	23.6017	14.2045	16.3746	24.9747	16.9866	123.861	25.6539	-2.34634	13.9135	15.6626	25.9649	17.808
420	126.35	24.3621	24.8771	14.2758	16.0582	25.0799	16.9345	124.027	25.5806	-1.46835	14.0895	15.5912	26.1095	17.5605
421	125.949	24.3983	24.3046	14.2055	16.0301	25.0932	17.0059	124.32	25.5996	-0.429225	14.299	15.5908	26.2453	17.3257
422	126.346	24.6943	24.7519	14.4927	15.9288	25.2156	16.7281	124.683	25.6602	0.725737	14.5301	15.6542	26.347	17.1136
423	125.626	24.1343	24.9041	14.5149	15.9273	25.2978	16.8108	125.06	25.7213	1.93416	14.7635	15.7622	26.405	16.9265
424	126.01	24.5033	24.6325	14.6707	15.7596	25.3813	16.7155	125.418	25.7615	3.13409	14.9761	15.8882	26.4271	16.7631
425	125.059	24.6527	26.0154	15.0859	15.3755	25.3057	16.3727	125.761	25.7812	4.27911	15.1467	16.0056	26.4343	16.6229
426	125.003	24.2756	25.8562	15.2093	15.2491	25.2287	16.3372	126.124	25.7984	5.34424	15.2598	16.0938	26.4525	16.5099
427	125.234	24.4286	25.1329	15.3085	15.1189	25.349	16.2362	126.564	25.8381	6.32054	15.3078	16.1429	26.5022	16.4338
428	126.005	24.9403	24.5692	15.2934	14.9664	25.2812	16.2343	127.134	25.9222	7.20115	15.2901	16.1549	26.592	16.4072
429	127.648	25.1296	23.2481	15.2116	14.8072	25.3071	16.1584	127.86	26.0613	7.9662	15.2095	16.1417	26.7162	16.4425
430	130.291	25.8512	21.7162	15.2607	14.712	25.5972	16.2805	128.724	26.2533	8.57567	15.0703	16.1206	26.8582	16.5465
431	130.486	25.7116	20.1469	15.1439	14.6303	25.9042	16.494	129.658	26.4871	8.97546	14.8785	16.1079	26.9967	16.7179
432	130.139	26.626	18.6521	15.115	14.6496	26.2964	16.7551	130.544	26.7504	9.11489	14.6445	16.1139	27.113	16.9469
433	130.832	26.7281	17.21	15.0997	14.5338	26.395	16.8372	131.242	27.037	8.96828	14.3877	16.1397	27.1954	17.2175
434	130.091	26.9169	17.5047	15.148	14.4072	26.6742	16.9663	131.614	27.352	8.55102	14.1383	16.1762	27.2404	17.5114
435	131.203	27.0624	16.7991	15.1219	14.355	27.037	17.0568	131.56	27.7119	7.92275	13.9349	16.2064	27.2512	17.8124
436	131.26	27.3607	15.6732	15.1758	14.4102	26.8987	17.4114	131.048	28.1399	7.17531	13.8172	16.2096	27.2336	18.1087
437	132.859	27.9293	14.8774	15.2692	14.3874	27.0988	17.5402	130.136	28.659	6.40985	13.8151	16.1674	27.1929	18.3943
438	133.285	28.666	14.3766	15.1781	14.367	27.4425	17.7912	128.969	29.2843	5.7122	13.9393	16.0691	27.1318	18.6666
439	133.266	29.487	13.6861	15.3969	14.3951	27.5339	18.0995	127.762	30.0171	5.13544	14.1765	15.9156	27.0495	18.9237
440	135.185	29.2073	14.4363	15.5057	14.3019	27.3887	18.0461	126.763	30.8427	4.69586	14.4919	15.7202	26.9428	19.1611
441	136.066	29.8198	14.1857	15.6392	14.3326	27.5518	18.3147	126.205	31.7316	4.38226	14.8396	15.5064	26.8066	19.3704
442	135.377	29.7369	12.7938	15.6593	14.3054	27.4508	18.7606	126.259	32.6446	4.17238	15.1767	15.3023	26.6358	19.5407
443	136.169	30.6768	11.436	15.6431	14.3794	27.4601	18.9768	127.004	33.541	4.048	15.4758	15.1345	26.426	19.6615
444	136.68	32.1629	10.0053	15.7446	14.5047	27.347	19.0958	128.407	34.3867	4.00242	15.7325	15.0218	26.1755	19.7271
445	137.814	33.465	9.38989	15.8263	14.6092	27.0567	19.1816	130.332	35.1621	4.03828	15.9642	14.9708	25.8865	19.7403
446	138.87	34.9053	8.98301	15.8496	14.7354	26.6076	19.2558	132.575	35.8666	4.15719	16.2012	14.9746	25.567	19.7129
447	140.878	36.44	8.80532	16.0485	14.7952	26.4535	19.2099	134.905	36.5183	4.34709	16.4738	15.0149	25.2315	19.6624
448	142.69	37.5196	8.15472	16.2921	14.8743	25.9743	19.1753	137.114	37.149	4.57427	16.799	15.0659	24.9002	19.6073
449	144.274	38.6093	7.97852	16.4728	15.0012	25.6334	19.0078	139.046	37.7955	4.78448	17.172	15.1004	24.5971	19.5599
450	145.884	39.4975	7.77264	16.6609	15.0321	25.2867	18.9975	140.618	38.4894	4.91333	17.5642	15.0958	24.3463	19.523
451	147.931	40.7017	8.43305	16.7244	15.085	25.0924	18.7803	141.809	39.2487	4.90259	17.9289	15.0406	24.168	19.4887
452	148.642	42.234	8.21956	16.7731	15.1763	24.7619	18.653	142.637	40.0739	4.71748	18.2115	14.9398	24.0759	19.4421
453	149.353	42.7008	8.71021	16.8907	15.3033	24.4792	18.4424	143.132	40.949	4.35939	18.3622	14.8173	24.0749	19.3686
454	150.108	43.5498	8.74895	16.9979	15.2571	24.2967	18.4023	143.321	41.8475	3.86966	18.3468	14.7152	24.1612	19.2599
455	148.976	44.0917	8.59478	17.0776	15.1476	24.214	18.2732	143.222	42.7391	3.32227	18.1532	14.6871	24.3231	19.1187
456	148.968	45.1153	8.49454	16.9249	15.4218	24.1088	18.3785	142.859	43.5966	2.80682	17.7932	14.7852	24.543	18.9582
457	149.445	46.0528	7.25985	16.824	15.4183	23.9302	18.3088	142.273	44.3992	2.4059	17.2988	15.0443	24.7983	18.798
458	148.776	45.7621	6.24254	16.6345	15.4861	23.7694	18.3828	141.536	45.1322	2.1729	16.7156	15.4659	25.0638	18.6579
459	148.256	45.9051	5.87626	16.3471	15.5151	23.6873	18.3795	140.743	45.785	2.11718	16.0945	16.0082	25.314	18.5517
460	149.208	45.8733	4.84896	16.1011	15.4455	23.6304	18.1945	139.983	46.3482	2.20246	15.4848	16.5886	25.5253	18.4844
461	148.185	46.5435	3.83974	15.7021	15.5397	23.8335	18.4479	139.312	46.8123	2.35991	14.9293	17.0987	25.6793	18.4527
462	147.848	46.6358	3.61504	15.5746	15.5252	23.998	18.3655	138.73	47.1683	2.5121	14.4604	17.4315	25.7647	18.449
463	146.699	46.5526	3.6355	15.0445	15.6067	24.0363	18.6253	138.176	47.4091	2.59846	14.0993	17.5118	25.7788	18.4654
464	145.379	46.7414	4.14073	14.8091	15.602	24.0906	18.6453	137.557	47.5317	2.59146	13.8544	17.3217	25.7277	18.4965
465	144.945	46.0684	4.23553	14.7625	15.6158	24.071	18.8097	136.789	47.538	2.49573	13.7218	16.9103	25.6236	18.5394
466	144.634	46.4594	4.27386	14.5122	15.5286	24.1563	18.9579	135.85	47.4347	2.33005	13.6849	16.3837	25.4825	18.5913
467	144.902	46.5729	4.19841	14.2764	15.6862	24.1791	19.3876	134.799	47.2321	2.10023	13.7169	15.8765	25.3208	18.6471
468	144.575	46.1546	4.52305	13.9701	15.6179	24.1791	19.4051	133.778	46.9441	1.77704	13.7846	15.5142	25.153	18.6985
469	144.417	45.4984	4.57227	13.7304	15.6234	24.2787	19.6051	132.968	46.5867	1.29377	13.8542	15.3783	24.9903	18.7361
470	143.549	46.2024	3.94476	13.3892	15.488	24.4901	19.6538	132.536	46.1784	0.570075	13.898	15.485	24.841	18.7534
471	142.177	45.6399	4.50364	13.0025	15.614	24.3528	19.9198	132.58	45.7371	-0.443797	13.8989	15.7856	24.7106	18.7518
472	141.727	44.1828	4.36368	13.0743	15.6196	24.2737	20.0605	133.096	45.2765	-1.72053	13.8531	16.1865	24.6022	18.7422
473	141.741	43.4827	3.79724	13.0702	15.6579	24.2782	20.0474	133.985	44.7995	-3.13008	13.7682	16.5818	24.5175	18.744
474	141.016	42.9549	3.32835	13.0898	15.7309	24.3238	20.1323	135.087	44.2928	-4.45208	13.6585	16.8855	24.4558	18.7784
475	140.566	41.8032	3.43608	12.9681	15.8381	24.2947	20.2716	136.228	43.725	-5.42875	13.5402	17.0542	24.4149	18.8607
476	139.929	41.6677	3.73213	12.7598	15.833	24.4719	20.2924	137.267	43.0502	-5.84288	13.4275	17.0917	24.3916	18.9928
477	140.338	40.2629	3.48301	12.6579	15.9193	24.4455	20.3648	138.123	42.2187	-5.59325	13.3314	17.0379	24.3821	19.1609
478	140.326	39.6478	2.70378	12.8215	15.9036	24.4517	20.244	138.779	41.1917	-4.73779	13.2607	16.9476	24.3831	19.3373
479	140.799	38.2838	2.6375	12.8835	15.9174	24.3398	20.2457	139.267	39.9558	-3.48543	13.2242	16.868	24.392	19.4887
480	140.604	37.1921	1.88392	13.0288	15.9621	24.3857	20.0848	139.647	38.5326	-2.137	13.2305	16.8238	24.4066	19.5861
481	140.223	35.6222	1.62295	13.1005	16.0089	24.1367	19.9912	139.976	36.9786	-0.995981	13.2865	16.8138	24.4244	19.6133
482	139.995	35.5616	1.46126	13.1555	16.1171	24.1776	19.8219	140.296	35.3761	-0.28159	13.3939	16.8185	24.4422	19.5709
483	141.092	34.2522	1.45491	13.3838	16.004	24.071	19.8211	140.623	33.8167	-0.0741712	13.5462	16.8124	24.4557	19.4748
484	140.849	32.8856	1.75033	13.553	16.074	24.1106	19.7357	140.941	32.384	-0.309083	13.7284	16.7766	24.461	19.3489
485	141.303	31.8691	1.5973	13.8104	16.0225	24.0928	19.5498	141.212	31.1391	-0.815745	13.9204	16.7045	24.4564	19.2158
486	141.369	30.7227	2.20716	14.1098	16.0544	24.0341	19.3352	141.382	30.1138	-1.38205	14.1038	16.6014	24.4442	19.0886
487	141.435	29.7946	2.27019	14.3369	15.9443	24.0491	19.1589	141.4	29.3119	-1.81787	14.2686	16.4776	24.4313	18.9675
488	141.887	29.0005	2.60267	14.5384	15.9297	24.1417	19.0337	141.235	28.7159	-1.99682	14.4179	16.342	24.4292	18.8411
489	142.535	28.5083	2.77761	14.8021	15.9248	24.1068	18.9174	140.892	28.2947	-1.86848	14.5673	16.1978	24.4506	18.6926
490	142.759	29.0237	2.32769	14.9113	15.8335	24.221	18.8605	140.412	28.0116	-1.4464	14.7393	16.0437	24.5064	18.5073
491	143.913	28.649	2.65981	14.9634	15.975	24.1305	18.7222	139.86	27.8285	-0.785449	14.9542	15.8794	24.6028	18.279
492	143.249	27.6361	3.43732	15.2436	15.991	23.9753	18.567	139.305	27.7083	0.0377856	15.2223	15.7115	24.7393	18.0116
493	142.314	27.3384	3.06621	15.362	15.8766	24.1411	18.3254	138.797	27.6175	0.93528	15.5384	15.5566	24.9098	17.7167
494	142.44	27.4299	2.99489	15.5485	15.7637	24.3929	17.9936	138.348	27.5289	1.81111	15.8818	15.4389	25.1048	17.4089
495	142.307	27.0884	3.29421	15.7772	15.7392	24.6232	17.8199	137.941	27.4259	2.56618	16.2204	15.3826	25.3156	17.1004
496	142.224	27.4301	3.72854	15.9777	15.6213	24.819	17.5447	137.546	27.3069	3.11095	16.5174	15.4011	25.5372	16.7991
497	141.856	27.246	4.34086	16.0284	15.6382	25.0562	17.2475	137.154	27.1874	3.38614	16.7384	15.4888	25.7702	16.5106
498	141.414	27.3008	4.66779	16.1585	15.5593	25.3571	17.0979	136.784	27.0978	3.3843	16.8569	15.6183	26.0199	16.2431
499	140.445	27.0321	4.29416	16.211	15.6241	25.5495	17.0577	136.483	27.0776	3.16096	16.8579	15.7461	26.2933	16.0137
500	140.452	26.8097	4.59521	16.3059	15.5623	25.7297	16.9775	136.294	27.1664	2.82674	16.7406	15.8245	26.5937	15.8501
501	139.492	26.843	5.74953	16.2569	15.4427	25.6934	16.8693	136.221	27.3948	2.519	16.5194	15.8166	26.9163	15.7881
502	138.963	27.0411	5.85339	16.2151	15.5305	25.906	16.8127	136.195	27.7781	2.36111	16.2242	15.7086	27.2444	15.8631
503	139.09	27.2177	6.11625	16.2193	15.5114	26.0734	16.8165	136.082	28.3134	2.42368	15.8989	15.5148	27.5488	16.0983
504	138.615	27.4364	6.52667	16.2104	15.4493	26.2163	16.9007	135.722	28.9827	2.70258	15.5965	15.2748	27.7919	16.4941
505	138.322	27.8933	6.4934	16.2757	15.3391	26.3239	16.9373	134.993	29.7573	3.12232	15.3714	15.0413	27.9337	17.0226
506	137.288	28.2194	6.93227	16.211	15.3447	26.2814	17.1728	133.882	30.6047	3.56323	15.2688	14.8646	27.9417	17.6308
507	136.977	28.0864	6.02897	16.2727	15.2797	26.3334	17.5084	132.515	31.4934	3.90192	15.3152	14.7787	27.7997	18.2505
508	137.323	29.2172	7.17099	16.4166	15.1935	26.3812	17.6026	131.145	32.3961	4.04987	15.5121	14.7927	27.513	18.8138
509	136.156	29.3587	6.99502	16.6095	15.3647	26.0303	18.1496	130.087	33.2902	3.97697	15.8356	14.8907	27.1096	19.2675
510	136.428	30.0438	7.06563	16.7303	15.2991	26.0663	18.4151	129.621	34.1568	3.71348	16.242	15.0391	26.6341	19.5837
511	136.62	31.0845	7.36419	16.758	15.3258	25.936	18.742	129.907	34.9795	3.33241	16.6789	15.1996	26.1366	19.7626
512	136.773	31.8702	6.20484	16.9872	15.2796	25.7865	19.2004	130.93	35.7434	2.92097	17.0968	15.3406	25.6603	19.8274
513	137.149	32.8897	5.63936	17.1508	15.2159	25.5022	19.4237	132.516	36.4345	2.5523	17.4593	15.4457	25.2305	19.8142
514	137.357	33.654	5.37027	17.1498	15.3361	25.3936	19.7078	134.392	37.041	2.2666	17.747	15.5153	24.8499	19.7617
515	138.085	34.6381	4.54113	17.2199	15.4717	25.0672	19.7656	136.282	37.5541	2.06658	17.9564	15.5614	24.5021	19.7019
516	138.238	35.3746	4.73901	17.4424	15.3607	24.7252	20.0128	137.994	37.9697	1.92588	18.0952	15.5995	24.1616	19.6555
517	138.871	35.8022	4.04472	17.5028	15.4208	24.448	19.9647	139.475	38.2892	1.80542	18.1749	15.6396	23.8083	19.6322
518	139.482	36.587	3.66341	17.7743	15.3396	24.0272	20.1868	140.808	38.5208	1.67068	18.2064	15.6814	23.4399	19.6329
519	139.511	37.3457	3.32895	17.8453	15.2627	23.7679	20.0765	142.165	38.6789	1.50398	18.198	15.7146	23.0787	19.6535
520	140.208	37.6633	3.22212	18.2379	15.3436	23.1952	20.1629	143.732	38.7829	1.30853	18.1573	15.7232	22.7696	19.6871
521	141.294	38.0057	3.83849	18.4618	15.3032	22.8391	19.943	145.631	38.8546	1.10449	18.0941	15.6931	22.5683	19.7249
522	142.568	38.1054	3.77164	18.8265	15.3042	22.3604	19.9294	147.874	38.9148	0.919268	18.0234	15.6187	22.5261	19.7565
523	144.349	37.9661	3.604	18.9828	15.2235	22.169	19.9619	150.35	38.9799	0.776258	17.9653	15.5056	22.6734	19.7697
524	145.685	38.5486	4.14547	18.9876	15.0154	22.0125	19.722	152.862	39.0593	0.685928	17.9422	15.3691	23.0095	19.7515
525	146.601	38.6047	3.86629	19.071	14.9401	22.0108	19.4262	155.175	39.154	0.64233	17.9738	15.2288	23.5004	19.6901
526	147.512	38.1403	4.08796	19.4117	14.9986	21.854	19.536	157.083	39.2586	0.625912	18.0716	15.102	24.087	19.5775
527	148.721	38.5172	4.13884	19.4617	14.9118	22.1669	19.4806	158.457	39.3638	0.611235	18.2344	14.9973	24.6987	19.4133
528	150.04	38.9129	4.3361	19.5723	14.817	22.3537	19.2981	159.268	39.4614	0.576749	18.4481	14.9135	25.2702	19.2059
529	151.826	39.4638	4.00503	19.6993	14.7987	22.6716	19.1485	159.579	39.5472	0.513118	18.6885	14.8405	25.7548	18.9727
530	154.251	40.0635	4.09203	19.789	14.7416	23.0688	18.953	159.523	39.6235	0.427043	18.9265	14.7655	26.1313	18.7376
531	155.383	40.7183	4.47753	19.7023	14.7975	23.272	18.951	159.259	39.698	0.339172	19.1345	14.6776	26.4039	18.5268
532	156.327	41.0107	3.97871	19.5442	14.8485	23.6702	18.8205	158.935	39.7812	0.276977	19.2927	14.5727	26.5943	18.3639
533	156.549	41.3827	3.66759	19.4647	14.8393	23.9688	18.75	158.66	39.8815	0.265348	19.392	14.4552	26.7318	18.2645
534	156.601	41.5189	3.58449	19.4039	14.8887	24.2634	18.6476	158.494	40.0029	0.318374	19.4346	14.3362	26.8431	18.2327
535	157.401	41.5226	3.61648	19.3303	14.8384	24.5074	18.5134	158.443	40.1426	0.435057	19.4327	14.2292	26.946	18.2595
536	156.838	41.6893	3.80668	19.174	14.8468	24.9535	18.359	158.481	40.293	0.600279	19.4045	14.1457	27.0469	18.3248
537	157.841	41.542	3.6236	18.9907	14.8254	25.0863	18.1292	158.561	40.4451	0.790375	19.3698	14.0918	27.1442	18.4011
538	158.211	41.8187	3.52517	18.8361	14.9387	25.1379	18.1104	158.635	40.5916	0.98058	19.3461	14.0675	27.2327	18.46
539	158.903	41.5932	3.2298	19.0154	14.9631	25.0972	17.9662	158.666	40.7303	1.15132	19.3447	14.0672	27.3088	18.4783
540	158.922	41.6125	3.68749	18.9243	14.9578	25.3191	18.0326	158.634	40.8643	1.29179	19.3691	14.0821	27.3736	18.4431
541	159.148	41.6243	3.84774	18.8963	14.9642	25.5706	17.9683	158.541	41.0005	1.40034	19.4142	14.1031	27.4338	18.3543
542	159.204	42.0652	3.97019	18.8433	14.9514	25.764	17.9305	158.408	41.146	1.48244	19.4685	14.1227	27.4986	18.2238
543	158.872	41.74	3.22849	19.0033	15.0481	25.7354	18.0276	158.267	41.3059	1.54739	19.5167	14.1367	27.5769	18.0718
544	158.921	41.8521	3.6756	18.9873	14.9886	25.8448	18.0529	158.153	41.4806	1.60518	19.5451	14.1435	27.6737	17.921
545	159.098	41.9258	3.65491	19.0626	15.0388	25.9716	18.1089	158.096	41.6672	1.66419	19.5449	14.1447	27.7885	17.791
546	159.493	42.1841	2.92334	19.1525	15.0837	26.0433	18.1108	158.108	41.8607	1.72937	19.516	14.1442	27.9155	17.6951
547	158.913	42.028	2.82939	19.0314	15.0546	25.9865	18.0486	158.179	42.0566	1.80088	19.4672	14.148	28.0462	17.6374
548	159.153	42.7945	2.98203	19.0022	15.0739	25.952	18.0056	158.282	42.2523	1.87336	19.413	14.1636	28.1716	17.6147
549	159.951	43.2254	1.95728	18.939	15.122	25.9617	18.0493	158.381	42.4477	1.93631	19.3682	14.1983	28.2859	17.6181
550	160.084	43.5687	1.14707	18.7224	15.1258	25.8181	18.0062	158.443	42.6438	1.97672	19.3414	14.2571	28.3874	17.6367
551	160.206	43.6435	1.90354	18.6511	15.1808	25.6422	18.0689	158.459	42.8419	1.98381	19.3301	14.3406	28.4788	17.6599
552	160.305	43.8667	1.12761	18.3557	15.1793	25.5942	17.8941	158.44	43.0431	1.9545	19.3187	14.4432	28.5657	17.6793
553	159.461	43.751	1.75988	18.1128	15.1857	25.4229	17.9826	158.419	43.2487	1.8972	19.2823	14.5532	28.654	17.6897
554	159.706	43.9613	1.55927	18.1715	15.1982	25.2743	18.1443	158.429	43.4614	1.83144	19.1934	14.6557	28.7478	17.6885
555	158.737	43.1042	2.05484	18.1063	15.197	25.0297	18.2937	158.488	43.6868	1.78211	19.0313	14.7368	28.8469	17.6761
556	158.459	43.2431	1.52871	17.8605	15.0281	24.9842	18.2817	158.582	43.9326	1.76975	18.789	14.7894	28.9462	17.6554
557	159.366	43.2005	1.46288	17.6377	14.9601	24.7917	18.2348	158.662	44.2066	1.80054	18.4765	14.8168	29.0357	17.6312
558	159.015	42.9534	1.46731	17.802	15.0099	24.775	18.2283	158.66	44.5134	1.86058	18.1184	14.8338	29.1031	17.61
559	159.777	43.5438	1.80453	17.6045	15.1017	24.8542	18.213	158.511	44.8509	1.91784	17.7459	14.8636	29.1361	17.5992
560	159.999	44.1045	1.82341	17.4967	14.9962	24.9943	18.2221	158.181	45.2078	1.9324	17.3873	14.9308	29.1264	17.6055
561	160.719	44.8862	1.24392	17.0543	15.1161	24.9039	18.2827	157.683	45.5645	1.87163	17.0597	15.0531	29.0723	17.6344
562	161.466	44.5382	0.431578	16.8681	15.1271	24.7192	18.2189	157.076	45.8965	1.72435	16.765	15.2343	28.9799	17.6887
563	161.904	44.5743	0.280223	16.67	15.144	24.7329	18.1981	156.447	46.1795	1.50818	16.4922	15.4611	28.8625	17.7688
564	160.745	44.3851	0.431284	16.5237	15.1208	24.7544	18.1292	155.884	46.395	1.26652	16.2251	15.7044	28.7378	17.8727
565	159.984	44.7619	0.940152	16.2585	15.1638	24.7144	18.115	155.445	46.5343	1.05572	15.951	15.9269	28.6235	17.997
566	159.974	44.9321	0.767528	16.0503	15.1771	24.7893	18.1328	155.141	46.6	0.927037	15.6686	16.093	28.5332	18.1371
567	158.585	45.0334	1.14276	15.7617	15.1401	24.6638	18.1241	154.939	46.6037	0.91043	15.3898	16.1783	28.4731	18.2881
568	158.228	45.0266	0.197827	15.5595	15.1288	24.7304	18.1474	154.782	46.563	1.0064	15.1366	16.1763	28.4417	18.4447
569	158.079	45.1452	0.0743569	15.4728	15.1443	24.8521	18.0905	154.619	46.4962	1.18879	14.9326	16.1001	28.4309	18.6013
570	157.668	45.5982	0.240247	15.286	15.3143	24.8796	18.0733	154.433	46.4196	1.41685	14.7937	15.9776	28.4294	18.7519
571	158.163	45.6351	-0.128001	15.1065	15.2207	24.8991	17.9715	154.248	46.3445	1.65103	14.7215	15.8436	28.4272	18.891
572	157.185	45.0653	0.368226	15.0201	15.1967	24.9076	17.8667	154.118	46.2775	1.86601	14.702	15.7298	28.4174	19.0147
573	156.977	44.7091	0.132623	14.9112	15.2108	24.9725	17.7439	154.105	46.2216	2.0563	14.7102	15.6573	28.3985	19.1216
574	156.556	44.6007	0.122004	14.7937	15.3167	25.0129	17.7703	154.243	46.1772	2.23296	14.7186	15.6326	28.3723	19.2144
575	156.063	44.9833	-0.723931	14.5431	15.2439	25.1603	17.6512	154.515	46.1434	2.41408	14.7057	15.6486	28.3429	19.2993
576	154.195	44.3121	-0.611077	14.5425	15.3841	24.9547	17.7588	154.852	46.1192	2.61406	14.662	15.6894	28.3134	19.3846
577	153.692	44.4236	-1.0293	14.3448	15.3695	25.0365	17.6822	155.147	46.1032	2.83692	14.5912	15.7371	28.2852	19.4781
578	152.603	43.94	-1.21272	14.2242	15.3671	25.0294	17.8021	155.297	46.0931	3.07579	14.5057	15.7782	28.2573	19.5848
579	151.765	43.5036	-0.783237	14.2804	15.3899	25.0597	17.8942	155.243	46.0859	3.31814	14.4197	15.8071	28.2275	19.7045
580	149.868	42.8821	-0.956189	14.3704	15.3835	25.1471	17.816	154.993	46.0779	3.55314	14.3431	15.8259	28.1938	19.832
581	149.309	43.4177	-1.08052	14.283	15.4113	25.3169	17.8355	154.628	46.0649	3.77722	14.2775	15.8419	28.1561	19.9583
582	148.184	43.845	-1.85731	14.2044	15.5125	25.2813	18.022	154.277	46.0432	3.99498	14.2167	15.8627	28.1156	20.0741
583	147.175	43.6219	-1.37235	14.1893	15.5058	25.3001	18.0924	154.078	46.0105	4.21552	14.1505	15.893	28.0753	20.1724
584	146.93	43.192	-1.69432	14.3193	15.4343	25.1969	18.0687	154.133	45.9663	4.44665	14.0702	15.9319	28.039	20.2515
585	147.626	42.7645	-1.13248	14.3875	15.3214	25.2188	18.1979	154.472	45.9121	4.69028	13.9723	15.9736	28.0105	20.3148
586	146.908	42.9778	-1.18745	14.5343	15.1118	25.1316	18.1725	155.044	45.8512	4.94143	13.8607	16.009	27.9929	20.3698
587	146.193	42.1004	-1.08773	14.5967	15.1097	24.9599	18.2492	155.738	45.7874	5.1907	13.745	16.0291	27.9881	20.4253
588	145.822	41.6513	-1.47215	14.5903	15.1372	24.8989	18.2133	156.411	45.7243	5.42904	13.6382	16.0272	27.9965	20.4883
589	145.964	40.9435	-1.95358	14.7814	15.1544	24.8257	18.0655	156.935	45.6638	5.65186	13.5532	16.0006	28.0161	20.5617
590	144.371	41.1673	-1.27751	14.7584	15.1837	24.7565	18.0789	157.232	45.6058	5.86019	13.5005	15.9511	28.0419	20.6439
591	144.257	40.6428	-1.49572	14.8388	15.1012	24.8411	17.9717	157.296	45.5472	6.05869	13.487	15.8844	28.0657	20.7293
592	144.076	40.3608	-1.29842	14.9953	15.0713	24.878	17.9521	157.189	45.483	6.25224	13.5161	15.8089	28.0771	20.8088
593	143.498	40.3588	-0.522323	15.0914	14.9632	24.8997	17.8411	157.026	45.4061	6.44339	13.587	15.7342	28.0656	20.8713
594	144.044	40.5136	-0.524297	15.0825	15.2442	25.0348	18.0215	156.938	45.3094	6.6326	13.6956	15.67	28.024	20.9042
595	143.58	40.5017	-1.01845	15.2826	15.172	25.0587	17.8959	157.04	45.1861	6.82078	13.8343	15.6237	27.9515	20.8948
596	143.158	40.3643	-1.13043	15.4372	15.3021	24.9437	17.8875	157.4	45.0314	7.01198	13.9935	15.5986	27.8547	20.8317
597	144.218	40.3947	0.127021	15.4784	15.4646	25.1656	17.8185	158.019	44.844	7.21305	14.1631	15.5924	27.7475	20.7078
598	144.361	40.3746	-0.257907	15.6016	15.5552	25.1802	17.6941	158.826	44.6264	7.42851	14.3353	15.5987	27.6479	20.5232
599	143.735	40.564	-0.133788	15.6736	15.5588	25.2018	17.6087	159.7	44.3857	7.65165	14.5069	15.6084	27.573	20.2879
600	142.769	40.649	-0.716914	15.6201	15.7276	25.2663	17.5467	160.49	44.1329	7.85601	14.6797	15.6147	27.5346	20.0219
601	142.465	40.3919	-0.485824	15.7315	15.7097	25.3418	17.6184	161.056	43.8808	7.9924	14.8586	15.6172	27.5359	19.7521
602	142.546	40.469	-0.228744	15.7742	15.8167	25.303	17.5652	161.304	43.6404	7.9956	15.0485	15.624	27.5707	19.5061
603	142.333	40.2663	-0.109841	15.7137	16.0083	25.2707	17.4941	161.199	43.4169	7.80108	15.2497	15.6506	27.6262	19.3045
604	142.161	39.9096	0.158223	15.8265	15.9937	25.1251	17.5317	160.772	43.2045	7.36754	15.4553	15.714	27.6866	19.1554
605	142.034	39.9694	0.571143	15.9747	16.048	25.0418	17.5608	160.1	42.9842	6.6974	15.6527	15.8249	27.7375	19.0514
606	141.243	39.7112	0.798915	16.0408	16.0946	25.0385	17.5477	159.27	42.7233	5.84708	15.8271	15.98	27.7687	18.9733
607	142.206	39.8063	0.609354	16.1467	16.0831	25.302	17.5037	158.348	42.3796	4.92227	15.969	16.1589	27.7752	18.8967
608	141.737	39.266	0.31259	16.209	16.1065	25.3105	17.2586	157.354	41.9081	4.05786	16.0798	16.3274	27.7559	18.8011
609	142.476	38.5649	0.95039	16.3646	15.9968	25.2761	17.2255	156.258	41.2706	3.38815	16.1737	16.4464	27.7115	18.6761
610	142.711	37.9856	1.21527	16.5175	15.9322	25.1926	17.2055	154.997	40.4439	3.01632	16.2749	16.4845	27.6418	18.524
611	142.838	37.3906	1.76015	16.5893	15.9739	25.316	17.2166	153.511	39.4268	2.99255	16.4092	16.429	27.5448	18.3566
612	143.322	36.9621	1.94636	16.6193	15.9124	25.3477	17.1266	151.779	38.2419	3.30644	16.5938	16.2918	27.4168	18.1885
613	143.295	36.4302	2.40783	16.6328	15.922	25.5513	17.0292	149.849	36.9335	3.89457	16.828	16.1056	27.2548	18.0291
614	143.398	36.0675	2.48791	16.635	15.8739	25.6243	17.066	147.84	35.562	4.65944	17.0899	15.9149	27.0597	17.8791
615	143.066	35.4933	2.71334	16.6487	15.7908	25.8046	17.138	145.933	34.1969	5.49311	17.3404	15.7611	26.8397	17.7298
616	142.575	34.7496	3.14415	16.6323	15.7316	25.857	17.1539	144.326	32.9091	6.29843	17.533	15.6705	26.6126	17.5689
617	142.748	34.0753	2.80751	16.6405	15.7999	26.0879	17.1458	143.2	31.7648	7.00334	17.627	15.6475	26.4053	17.3874
618	142.736	33.8244	3.34676	16.6995	15.7053	26.1312	17.1445	142.668	30.82	7.56651	17.5998	15.6752	26.251	17.1859
619	142.395	33.8378	3.70414	16.6963	15.7655	26.4188	17.2009	142.753	30.1163	7.9749	17.4535	15.723	26.1834	16.9779
620	143.252	33.6736	3.35769	16.8735	15.7044	26.5743	17.4341	143.375	29.6774	8.23568	17.2143	15.7581	26.2288	16.7883
621	143.511	33.5588	3.00934	16.9035	15.7152	26.6857	17.5978	144.363	29.5059	8.36559	16.9254	15.7559	26.3986	16.6478
622	142.577	33.6041	3.16571	16.8006	15.7953	26.7691	17.8418	145.482	29.5828	8.38071	16.6346	15.7075	26.6841	16.5854
623	141.599	33.2763	2.85492	16.8319	15.7497	26.7791	17.9865	146.469	29.8693	8.28913	16.3826	15.6211	27.0555	16.6224
624	141.805	33.0597	2.12172	16.9699	15.8001	26.7328	18.3651	147.081	30.3131	8.08863	16.1941	15.5182	27.4665	16.7675
625	142.264	33.1977	2.29698	16.8859	15.8257	26.8781	18.5495	147.133	30.857	7.77027	16.0742	15.4262	27.8633	17.0157
626	142.58	33.6986	1.88442	17.173	15.7588	26.6928	18.7769	146.535	31.4493	7.32714	16.0124	15.3703	28.1959	17.3493
627	142.603	34.2682	2.08062	17.397	15.7774	26.759	18.8833	145.305	32.0524	6.76541	15.9896	15.3652	28.4282	17.7406
628	143.702	34.5486	1.94857	17.5415	15.6723	26.6522	18.9437	143.572	32.6467	6.11337	15.988	15.4108	28.5444	18.1551
629	144.896	34.4213	1.3562	17.9587	15.5962	26.2668	18.9752	141.56	33.2305	5.42434	15.9983	15.4913	28.5486	18.5557
630	145.911	34.4031	0.892161	18.4905	15.5634	25.8532	19.1835	139.546	33.8129	4.77059	16.0237	15.5791	28.4595	18.9065
631	146.199	34.8078	1.36464	18.3729	15.5719	25.8808	19.1925	137.814	34.406	4.22858	16.0771	15.6433	28.3016	19.1784
632	145.611	34.7706	1.55403	18.4978	15.5742	25.8509	19.0909	136.604	35.0159	3.85949	16.1764	15.6592	28.0962	19.3527
633	146.19	34.9212	1.8603	18.4779	15.4474	25.7815	19.215	136.069	35.6382	3.69162	16.3356	15.6167	27.8559	19.4254
634	146.587	35.2757	1.41895	18.6791	15.3949	25.6596	19.2275	136.253	36.2576	3.71165	16.5593	15.5249	27.5841	19.4079
635	147.082	35.9272	2.3631	18.8365	15.3588	25.6666	19.2319	137.09	36.8528	3.86798	16.8392	15.4091	27.2788	19.3246
636	147.653	36.3041	1.94077	18.9506	15.3147	25.6351	19.2271	138.43	37.4034	4.08532	17.156	15.303	26.9391	19.2073
637	148.835	36.62	1.92924	19.0419	15.223	25.5156	19.1369	140.069	37.8968	4.28612	17.4839	15.2364	26.572	19.0879
638	149.587	37.0093	2.86523	19.0239	15.2002	25.5459	18.7878	141.802	38.333	4.41116	17.7977	15.2245	26.1945	18.9902
639	150.092	37.5813	2.84673	19.1631	15.2041	25.47	18.7933	143.452	38.7241	4.4318	18.0786	15.2631	25.8327	18.9257
640	149.494	37.7283	3.46463	19.1573	15.2447	25.5332	18.7817	144.895	39.0907	4.35092	18.317	15.3312	25.5166	18.8921
641	149.487	38.2168	4.16069	19.1883	15.2435	25.697	18.6493	146.07	39.4546	4.19416	18.5124	15.4002	25.2731	18.8767
642	149.171	38.1044	5.0506	19.1518	15.3212	25.4883	18.7052	146.969	39.8322	3.99593	18.6698	15.4468	25.1191	18.8626
643	150.376	39.1377	4.82729	19.1725	15.2619	25.5389	18.6408	147.627	40.2294	3.78557	18.7954	15.4617	25.058	18.8355
644	150.661	39.5969	4.66894	19.2322	15.3195	25.5878	18.5587	148.107	40.6405	3.57903	18.893	15.4526	25.0793	18.7883
645	152.296	40.6329	4.48331	19.1692	15.4192	25.5884	18.5576	148.487	41.0518	3.37811	18.9609	15.4384	25.1625	18.7231
646	152.826	40.8999	4.98377	19.0365	15.4646	25.8427	18.2693	148.851	41.4474	3.17552	18.9923	15.4389	25.2829	18.6487
647	154.453	41.239	4.38139	19.0784	15.566	25.7355	18.5276	149.272	41.8163	2.96248	18.9764	15.4648	25.4182	18.5761
648	155.192	41.7926	4.35175	18.8999	15.7619	25.9532	18.4795	149.79	42.1583	2.7357	18.9003	15.5132	25.5544	18.5135
649	155.255	42.6316	4.5209	18.6598	15.8517	26.1636	18.4305	150.399	42.4853	2.50169	18.7512	15.5712	25.689	18.4623
650	155.265	43.158	4.4168	18.3366	16.063	26.4137	18.4204	151.026	42.8188	2.27764	18.518	15.6258	25.8304	18.4164
651	155.115	43.4171	4.26831	18.2124	16.1416	26.4339	18.5135	151.545	43.1823	2.08983	18.1935	15.6744	25.9944	18.3646
652	154.845	44.0934	4.60379	17.9275	16.3368	26.5619	18.261	151.797	43.5936	1.9701	17.7758	15.7313	26.1975	18.2949
653	154.736	44.5707	4.13656	17.4066	16.5023	26.6309	18.3909	151.636	44.0569	1.95098	17.2702	15.8247	26.4497	18.1999
654	155.095	44.902	4.13215	17.2232	16.6531	26.624	18.4959	150.98	44.5604	2.05963	16.6913	15.9857	26.7478	18.0811
655	156.056	45.9635	4.04096	16.5932	16.6811	26.8218	18.3542	149.847	45.0774	2.31136	16.0635	16.2323	27.0726	17.9506
656	155.481	46.5475	4.42308	15.9866	16.98	26.9518	18.2626	148.366	45.5738	2.70412	15.4193	16.5562	27.3909	17.8302
657	155.309	46.6258	3.56565	15.4866	17.1566	27.1333	18.2207	146.739	46.0163	3.21626	14.7944	16.9191	27.6633	17.7475
658	154.158	47.0769	4.35209	14.8073	17.318	27.4365	18.1737	145.188	46.3813	3.80933	14.2212	17.2602	27.8552	17.7305
659	153.259	47.0458	4.65549	14.2479	17.4603	27.6808	17.9872	143.887	46.6593	4.43596	13.7214	17.5143	27.9475	17.8025
660	152.361	47.7574	4.50173	13.6937	17.6661	27.7469	18.0488	142.909	46.8544	5.05101	13.3004	17.6335	27.9446	17.9768
661	152.279	48.4491	5.03351	13.034	17.7676	28.0411	17.9058	142.217	46.9809	5.622	12.9459	17.6043	27.8741	18.2539
662	150.783	48.2206	4.90846	12.8001	17.6449	28.061	17.9389	141.698	47.0556	6.13373	12.6321	17.454	27.7789	18.6202
663	149.433	47.898	4.68089	12.5092	17.7299	27.8833	18.04	141.225	47.0919	6.58493	12.3282	17.2425	27.7038	19.049
664	149.148	47.6928	4.19468	12.5824	17.5428	27.8889	18.0637	140.723	47.0961	6.97831	12.011	17.0435	27.6807	19.5036
665	148.187	47.5296	4.18329	12.3868	17.4677	27.9486	18.1433	140.212	47.0669	7.30858	11.6739	16.9209	27.7178	19.9423
666	147.25	47.4941	4.46571	12.3426	17.5256	28.0183	18.2338	139.805	46.9983	7.55548	11.3331	16.909	27.7974	20.3245
667	144.487	47.5828	5.9997	12.1484	17.5989	27.9355	18.1665	139.66	46.8845	7.68634	11.0244	17.0038	27.8832	20.6173
668	143.556	47.4738	4.91811	12.108	17.5479	27.9291	18.4818	139.918	46.7234	7.66856	10.7929	17.1667	27.9341	20.8008
669	142.536	47.2683	4.83969	11.8064	17.4901	27.8039	18.7468	140.628	46.5192	7.4861	10.6787	17.3406	27.9202	20.8724
670	142.94	47.1553	4.51501	11.9084	17.4748	27.8521	18.9748	141.722	46.282	7.15174	10.7015	17.4703	27.833	20.8465
671	142.143	46.6054	4.45906	11.7868	17.581	27.7244	19.2831	143.022	46.0255	6.70729	10.8521	17.5214	27.6885	20.7521
672	141.193	46.6224	4.52633	11.6941	17.4859	27.6561	19.5727	144.293	45.763	6.2089	11.0921	17.4902	27.519	20.6266
673	140.476	45.6088	4.87245	11.7473	17.5328	27.5966	19.8102	145.316	45.5033	5.70252	11.3635	17.4018	27.3601	20.5077
674	140.56	45.3646	5.08379	11.4809	17.4378	27.5721	20.1938	145.953	45.2485	5.20027	11.6046	17.2995	27.2363	20.4262
675	140.035	44.7442	4.78669	11.5303	17.5621	27.4255	20.4109	146.177	44.9927	4.67022	11.7674	17.2275	27.1522	20.3999
676	139.578	44.6761	5.1976	11.6531	17.3752	27.1529	20.4172	146.069	44.7229	4.04686	11.8293	17.2166	27.0919	20.4319
677	139.985	44.7331	5.80069	11.4627	17.487	27.0779	20.6518	145.77	44.4222	3.26091	11.7972	17.2752	27.0277	20.5114
678	139.566	44.5865	5.07888	11.4048	17.494	27.0585	20.834	145.427	44.073	2.27768	11.7014	17.3895	26.9319	20.619
679	139.457	44.4466	5.21994	11.1325	17.4227	26.898	20.9213	145.138	43.6611	1.12784	11.5829	17.531	26.7899	20.7327
680	140.231	43.5312	4.78687	11.2814	17.4342	26.7785	20.9815	144.921	43.1788	-0.0845	11.4789	17.6681	26.6052	20.834
681	139.954	42.9627	4.97035	11.1517	17.4069	26.8448	21.0675	144.72	42.6259	-1.2027	11.4119	17.7759	26.3988	20.9113
682	140.095	42.445	4.71488	11.1157	17.4018	26.6624	21.1172	144.436	42.0106	-2.06173	11.3861	17.8418	26.2003	20.9607
683	139.992	41.8372	4.6265	11.1261	17.3374	26.6532	21.0963	143.971	41.3471	-2.53977	11.3909	17.8658	26.0365	20.984
684	140.716	41.612	5.03351	11.2377	17.3864	26.6373	21.0628	143.276	40.6539	-2.5978	11.4099	17.8559	25.9226	20.9852
685	139.972	41.1153	4.28476	11.3525	17.5079	26.6096	20.9804	142.373	39.9505	-2.2918	11.4304	17.8226	25.8578	20.967
686	140.421	40.3512	3.99309	11.3896	17.559	26.5926	20.8057	141.358	39.2553	-1.75316	11.4504	17.774	25.8288	20.929
687	139.822	39.0891	4.07782	11.2772	17.462	26.384	20.9392	140.369	38.5832	-1.14537	11.4791	17.7147	25.8161	20.8686
688	139.731	39.3008	3.36031	11.2715	17.5106	26.343	20.9644	139.548	37.9445	-0.614198	11.5335	17.6475	25.8034	20.7825
689	140.273	39.0324	3.60467	11.1178	17.4232	26.4092	20.9654	138.994	37.3438	-0.249729	11.6305	17.5759	25.7826	20.67
690	140.07	38.6108	3.8967	11.083	17.5967	26.4442	20.8513	138.733	36.7795	-0.0730695	11.7798	17.5062	25.7557	20.5351
691	140.08	38.5092	2.79892	10.9304	17.5758	26.3882	20.7294	138.712	36.2454	-0.0494154	11.9804	17.4472	25.7304	20.3866
692	138.944	37.6721	3.00581	11.1079	17.6957	26.4007	20.6604	138.824	35.7316	-0.1183	12.2208	17.408	25.7152	20.2358
693	138.246	36.9534	2.79777	11.127	17.7193	26.4559	20.6203	138.945	35.2282	-0.226285	12.4838	17.3943	25.7135	20.0935
694	137.107	36.1136	2.72582	11.3987	17.8181	26.3023	20.6851	138.982	34.7281	-0.348089	12.7526	17.4053	25.7213	19.9658
695	136.498	35.5824	1.60549	11.5596	17.8505	26.2369	20.5587	138.906	34.2298	-0.488855	13.016	17.433	25.7292	19.8529
696	135.694	35.0966	1.78042	11.7501	17.6658	26.1547	20.4381	138.753	33.7389	-0.669662	13.2702	17.4642	25.7267	19.749
697	135.458	34.3139	2.02024	12.1222	17.6137	25.9609	20.3464	138.611	33.2669	-0.905295	13.517	17.4844	25.7077	19.6457
698	135.614	33.5302	1.22718	12.267	17.5335	25.8357	20.1879	138.571	32.8286	-1.18588	13.7594	17.4823	25.674	19.5358
699	135.384	33.1455	1.05633	12.5868	17.3926	25.567	20.0248	138.688	32.437	-1.4719	13.9963	17.453	25.6348	19.4171
700	136.305	33.3559	1.0018	12.5401	17.1961	25.5403	20.1314	138.954	32.0993	-1.70494	14.2208	17.3989	25.6035	19.2945
701	137.771	32.6058	1.24681	12.8075	17.0373	25.3341	20.0653	139.296	31.8137	-1.82852	14.4211	17.3275	25.591	19.1786
702	138.885	31.0834	2.37715	12.9419	16.8891	24.9939	19.8882	139.599	31.5696	-1.80935	14.5849	17.2485	25.6004	19.0825
703	139.343	30.0967	2.02983	13.2377	16.8396	24.8477	19.7072	139.751	31.3503	-1.65043	14.7052	17.1697	25.6242	19.0167
704	138.988	29.9007	2.26347	13.4004	16.8084	24.771	19.5903	139.684	31.1375	-1.39032	14.7846	17.0946	25.6463	18.9844
705	138.769	29.5128	1.06877	13.4664	16.7969	24.8078	19.4843	139.393	30.9163	-1.08803	14.8363	17.0218	25.6477	18.979
706	138.646	28.9286	0.701009	13.5041	16.8388	24.6232	19.6044	138.93	30.6789	-0.799727	14.8807	16.9469	25.6147	18.9848
707	139.19	28.5655	-0.0916358	13.6726	16.8384	24.5671	19.5689	138.381	30.4252	-0.557319	14.9396	16.8664	25.5451	18.9803
708	139.272	28.2955	0.246362	13.8462	16.9408	24.6008	19.3076	137.82	30.1615	-0.357813	15.0296	16.7784	25.45	18.944
709	137.896	27.9712	-0.71165	14.1118	16.8457	24.6277	19.0756	137.278	29.8954	-0.167223	15.1579	16.6839	25.3502	18.86
710	136.676	27.6645	-0.275092	14.4152	16.601	24.5332	18.8855	136.737	29.6319	0.0629802	15.3219	16.5855	25.2683	18.7229
711	135.229	27.1511	0.686098	14.8059	16.3881	24.6126	18.7176	136.14	29.3693	0.374035	15.5126	16.4846	25.2188	18.5389
712	134.341	26.9087	1.52373	15.0718	16.2763	24.352	18.6108	135.424	29.0988	0.781981	15.7189	16.381	25.2011	18.3248
713	132.257	26.0505	1.49755	15.3049	16.2018	24.32	18.4814	134.559	28.8067	1.27119	15.93	16.2738	25.1994	18.1031
714	130.926	26.6452	2.98651	15.587	16.1633	24.0708	18.3513	133.577	28.479	1.80226	16.1363	16.166	25.1882	17.8962
715	130.568	26.5538	3.13163	15.7463	15.9376	24.1973	18.1999	132.574	28.1075	2.33084	16.3267	16.0684	25.144	17.7204
716	130.066	26.3326	3.95337	15.9593	15.8808	24.3631	17.8583	131.693	27.6938	2.82879	16.4863	16.0016	25.0564	17.5821
717	130.772	26.4083	4.0978	16.1545	15.7097	24.471	17.5705	131.082	27.2509	3.29791	16.5964	15.9918	24.9351	17.477
718	130.928	26.0163	4.31141	16.1684	15.6887	24.5306	17.4304	130.855	26.8015	3.76983	16.6383	16.0609	24.8087	17.3925
719	131.564	25.9282	4.85668	16.2432	15.6867	24.5583	17.4391	131.053	26.3729	4.29068	16.6011	16.214	24.7161	17.313
720	131.55	25.6372	6.22599	16.147	15.4818	24.7861	17.2374	131.641	25.9915	4.89673	16.4888	16.4289	24.6923	17.2252
721	131.254	25.6725	6.66429	16.2169	15.3064	24.97	17.2503	132.519	25.6783	5.59112	16.3239	16.655	24.7562	17.1227
722	130.816	25.7772	7.14087	16.2328	15.2565	25.0836	17.2381	133.56	25.4471	6.33193	16.144	16.8242	24.9037	17.0074
723	131.739	25.7504	7.99607	16.2113	15.2201	25.2625	16.9638	134.644	25.3052	7.03748	15.9911	16.872	25.1104	16.8895
724	133.12	25.9644	8.82883	16.0674	15.1352	25.4637	16.7796	135.692	25.2566	7.60801	15.8975	16.7621	25.3416	16.7842
725	133.753	26.1534	8.68711	16.0855	15.1236	25.7095	16.7959	136.675	25.3051	7.95597	15.8725	16.5039	25.5658	16.7081
726	134.928	26.2702	8.30349	16.0005	15.1239	25.8596	16.6592	137.604	25.456	8.03362	15.8982	16.1555	25.7658	16.676
727	136.372	26.0848	8.38606	16.003	14.9798	26.0571	16.4744	138.493	25.7146	7.84783	15.9343	15.8076	25.9435	16.6993
728	136.707	26.4229	8.45123	15.9793	14.9314	26.3134	16.455	139.33	26.0835	7.45712	15.9331	15.5542	26.1151	16.785
729	136.549	26.4942	8.63533	15.8737	14.8611	26.6666	16.3936	140.049	26.5588	6.95263	15.8579	15.4588	26.3013	16.9364
730	137.508	26.8289	8.60608	15.9621	14.7111	26.9166	16.3887	140.536	27.1285	6.43068	15.6976	15.5316	26.515	17.1532
731	137.093	27.3354	8.3602	15.9708	14.781	27.1456	16.6952	140.653	27.7732	5.9674	15.4724	15.7258	26.7536	17.4309
732	137.98	27.9088	8.30339	16.1357	14.8602	27.1085	16.9345	140.292	28.4695	5.60334	15.2282	15.9549	26.9975	17.7599
733	137.761	28.3603	8.08562	16.0991	14.9741	27.2389	17.3123	139.417	29.1952	5.34163	15.0207	16.1257	27.2148	18.1249
734	138.597	29.3243	7.66216	16.1803	14.9855	27.2416	17.5965	138.103	29.9328	5.15775	14.8975	16.1723	27.3716	18.5048
735	139.038	30.2844	7.22251	16.1738	15.0227	27.2358	17.943	136.534	30.6711	5.01549	14.8834	16.0782	27.441	18.8753
736	139.255	30.735	7.29573	16.1235	15.2079	27.447	18.6778	134.966	31.4035	4.88224	14.9742	15.8781	27.4094	19.2118
737	139.518	31.7872	6.58137	16.3783	15.1632	27.2449	19.1259	133.666	32.1247	4.73838	15.1415	15.6399	27.2777	19.4933
738	138.919	33.2055	6.06625	16.5822	15.2727	26.9721	19.5897	132.847	32.8276	4.57959	15.3448	15.4349	27.0583	19.7059
739	138.975	33.311	6.53288	16.6285	15.2619	26.7028	19.7751	132.617	33.5022	4.4139	15.5469	15.31	26.7701	19.8446
740	140.075	34.5645	4.968	16.9155	15.5202	26.3431	20.1817	132.958	34.1368	4.25607	15.7251	15.2723	26.4333	19.9133
741	141.184	34.9653	4.90169	17.1058	15.5059	26.0889	20.1784	133.749	34.7215	4.12192	15.8775	15.2923	26.0667	19.9229
742	142.501	35.8241	5.8719	17.491	15.6045	25.747	20.2523	134.812	35.2517	4.0246	16.0199	15.3217	25.6865	19.8874
743	144.242	36.7323	5.13735	17.5452	15.85	25.428	20.2485	135.98	35.7297	3.97241	16.1778	15.3166	25.3065	19.8223
744	144.725	36.6548	6.2415	17.7334	15.6854	24.9125	20.305	137.136	36.1638	3.96743	16.3759	15.2569	24.939	19.7414
745	145.096	37.539	6.39773	17.9792	15.7568	24.676	20.2769	138.246	36.5651	4.0046	16.6282	15.1523	24.5949	19.656
746	147.293	38.5144	6.29015	18.3528	15.7282	24.2564	20.0735	139.344	36.944	4.07152	16.9328	15.0354	24.2845	19.574
747	148.917	39.4744	5.45097	18.6636	15.8405	24.0565	20.068	140.5	37.3081	4.14953	17.2712	14.9454	24.0174	19.4992
748	150.428	40.5794	5.62979	18.7039	15.8913	23.7706	19.8988	141.774	37.6617	4.21657	17.6137	14.9114	23.8025	19.4317
749	150.58	41.0348	5.96864	18.7532	15.9431	23.7945	19.6646	143.182	38.009	4.25172	17.9269	14.9424	23.6481	19.3679
750	152.404	41.8187	5.90556	18.6737	16.0861	23.8722	19.4773	144.683	38.356	4.23989	18.1833	15.0258	23.5601	19.3024
751	154.263	42.9516	4.89595	18.8336	16.177	23.8607	19.2611	146.179	38.7131	4.17437	18.3689	15.1347	23.5413	19.2296
752	155.546	43.6395	4.4544	18.7649	16.3545	23.933	19.1054	147.554	39.094	4.05687	18.4861	15.2389	23.5883	19.1458
753	157.743	44.2268	3.64069	18.6422	16.4675	24.0949	18.9721	148.706	39.5129	3.89491	18.5513	15.314	23.6918	19.051
754	157.655	44.3134	4.06209	18.7311	16.5952	24.07	19.0336	149.576	39.9803	3.69763	18.5871	15.3464	23.837	18.9484
755	158.552	44.9278	4.11434	18.1698	16.6509	24.3622	18.8882	150.164	40.4989	3.47216	18.6111	15.3334	24.0073	18.8436
756	157.704	44.6541	4.01944	18.171	16.6434	24.279	18.943	150.522	41.0631	3.22297	18.6261	15.282	24.1891	18.7413
757	158.043	45.2346	4.8338	17.8043	16.7065	24.6645	18.7354	150.73	41.6603	2.95443	18.6146	15.2067	24.376	18.6433
758	156.717	45.3597	4.67848	17.6981	16.6836	24.756	18.6681	150.863	42.2747	2.67443	18.5422	15.1291	24.5708	18.5472
759	155.553	45.0505	5.52561	17.3584	16.5831	24.9924	18.6698	150.963	42.8914	2.39704	18.3682	15.0781	24.7835	18.4477
760	153.076	45.644	6.53412	16.7398	16.6873	25.3196	18.628	151.017	43.4991	2.14178	18.0606	15.0876	25.0253	18.3397
761	151.332	45.4222	5.64299	16.3136	16.7184	25.4457	18.6589	150.958	44.0903	1.92956	17.6106	15.1901	25.3026	18.2224
762	150.402	44.9776	5.19454	16.0059	16.7394	25.6137	18.6378	150.688	44.6598	1.77685	17.0404	15.4077	25.6107	18.1025
763	149.58	44.8018	5.43421	15.8588	16.7261	25.6587	18.3762	150.114	45.2018	1.69149	16.3998	15.7429	25.9329	17.9938
764	149.487	45.1665	4.96423	15.3308	16.7171	25.7666	18.2645	149.185	45.7078	1.67224	15.753	16.1726	26.2435	17.9134
765	148.887	45.7545	4.71255	15.0522	16.756	25.8379	18.3135	147.926	46.166	1.71363	15.1604	16.6486	26.5141	17.8763
766	148.404	45.6352	3.86148	14.7542	16.6607	25.8757	18.3086	146.447	46.563	1.81439	14.6607	17.107	26.7221	17.8888
767	147.61	45.6913	4.4567	14.3594	16.614	25.8686	18.344	144.925	46.8872	1.98444	14.2615	17.4828	26.8561	17.9453
768	147.009	45.7385	3.87645	13.8506	16.6571	25.9259	18.2371	143.557	47.1326	2.24552	13.9401	17.7247	26.9195	18.0296
769	146.714	45.5227	3.44963	13.6607	16.6505	25.9169	18.1658	142.506	47.3011	2.62353	13.6552	17.8063	26.9286	18.1199
770	146.46	45.6865	5.1128	13.4407	16.5841	25.9675	17.9663	141.851	47.4033	3.13432	13.3635	17.7304	26.9086	18.1973
771	146.468	45.9024	3.72197	13.001	16.5357	26.108	17.9778	141.558	47.4561	3.76779	13.0357	17.5252	26.887	18.253
772	145.467	46.2573	4.63124	12.7389	16.4492	26.3031	18.0722	141.495	47.4785	4.47788	12.6657	17.2359	26.8872	18.293
773	144.686	46.1022	4.38126	12.7057	16.538	26.4495	18.1903	141.478	47.4862	5.18447	12.2708	16.9132	26.9236	18.3361
774	144.469	46.6464	4.5424	12.5871	16.5493	26.4586	18.3144	141.34	47.4868	5.78853	11.8835	16.6043	26.9984	18.4085
775	144.196	46.1438	3.51023	12.6107	16.5629	26.405	18.4145	140.991	47.4769	6.19643	11.5395	16.3466	27.1011	18.5341
776	143.786	46.3257	3.80759	12.3543	16.6153	26.4163	18.5637	140.462	47.4434	6.34554	11.2666	16.1653	27.211	18.726
777	143.753	46.8577	3.04329	12.2083	16.7512	26.4164	18.7426	139.893	47.3673	6.22137	11.0785	16.0729	27.3011	18.9814
778	144.246	46.901	2.56697	12.3001	16.7109	26.5009	18.725	139.483	47.2306	5.85962	10.9739	16.0696	27.3458	19.2817
779	143.85	46.8118	2.48936	12.4028	16.6474	26.38	18.7763	139.427	47.0234	5.33278	10.9405	16.1451	27.3271	19.597
780	144.051	47.0185	2.2788	12.3428	16.5751	26.4083	18.8089	139.835	46.7482	4.72693	10.9611	16.2794	27.2411	19.8939
781	144.574	46.4758	2.11873	12.3263	16.5612	26.4212	18.946	140.695	46.4212	4.11744	11.0189	16.4462	27.0991	20.1443
782	144.193	46.7567	2.11895	12.039	16.8104	26.31	19.2462	141.872	46.0672	3.55203	11.1016	16.6168	26.9246	20.3316
783	145.948	46.6576	2.2365	11.9944	16.7492	26.3244	19.1923	143.143	45.7123	3.04597	11.2018	16.7651	26.7466	20.4543
784	145.366	46.7487	1.91806	11.8041	16.684	26.4864	19.4924	144.266	45.3746	2.58867	11.3175	16.8725	26.5895	20.5251
785	144.035	46.4152	1.38746	11.542	16.9224	26.3068	19.869	145.044	45.0584	2.15603	11.4497	16.9312	26.4659	20.5671
786	145.448	46.3447	1.71603	11.4667	16.8636	26.4137	20.0604	145.373	44.7531	1.72225	11.6018	16.9454	26.3734	20.6075
787	145.049	45.9788	1.08027	11.5211	16.8307	26.4475	20.2076	145.26	44.4379	1.26675	11.7772	16.9292	26.2972	20.6702
788	144.754	45.4639	1.5335	11.6686	16.8003	26.3047	20.3413	144.807	44.0912	0.775536	11.9779	16.9028	26.2184	20.769
789	145.039	45.415	1.69523	11.6075	16.837	26.3425	20.4135	144.176	43.6997	0.239525	12.2027	16.887	26.1231	20.903
790	145.333	44.4997	1.9071	11.8624	16.8886	26.371	20.5084	143.544	43.265	-0.346293	12.4454	16.8988	26.0098	21.0555
791	146.061	45.3145	1.73099	11.9302	16.7807	26.321	20.4551	143.059	42.8026	-0.980161	12.6955	16.9468	25.8911	21.1976
792	146.24	45.2239	1.4922	12.0741	16.8144	26.2135	20.556	142.814	42.3355	-1.648	12.9399	17.0298	25.7893	21.2954
793	146.904	45.2786	0.388492	12.1028	16.8917	26.2411	20.3348	142.827	41.8834	-2.31883	13.1661	17.1369	25.7278	21.3195
794	146.204	44.8849	1.26189	12.3059	16.8444	26.1413	20.3558	143.045	41.4523	-2.94591	13.3657	17.2499	25.7212	21.2541
795	146.189	44.2158	0.311625	12.5702	16.8205	26.0397	20.227	143.362	41.0297	-3.47573	13.5371	17.3475	25.7694	21.1019
796	144.97	43.6641	0.862174	12.9218	16.7125	25.7297	20.1245	143.644	40.5857	-3.86293	13.6856	17.4109	25.8569	20.8834
797	146.665	43.1681	2.44909	13.2867	16.6361	25.9071	19.6833	143.762	40.083	-4.08637	13.8213	17.4283	25.9579	20.6313
798	146.815	42.7931	1.89732	13.3991	16.6737	25.9324	19.6063	143.629	39.4883	-4.15977	13.9559	17.3988	26.0456	20.3798
799	147.453	43.2489	2.535	13.6527	16.5886	26.0894	19.4236	143.221	38.784	-4.13105	14.0991	17.3315	26.0998	20.1542
800	147.371	42.8137	1.94073	13.8661	16.6494	26.091	19.4459	142.584	37.9746	-4.06911	14.2576	17.2426	26.113	19.9642
801	147.466	42.561	1.96766	13.9868	16.5968	26.2129	19.3428	141.817	37.0846	-4.04216	14.4349	17.1492	26.0897	19.8027
802	146.305	42.5009	2.26509	14.1608	16.6628	26.2004	19.3128	141.048	36.1514	-4.09472	14.6326	17.0628	26.0428	19.6509
803	145.82	42.5083	3.57219	14.2355	16.6929	26.2782	19.2101	140.39	35.2135	-4.23169	14.852	16.9859	25.9872	19.4861
804	145.492	42.8584	2.50089	14.5041	16.7373	26.5372	18.7423	139.913	34.3015	-4.41501	15.0938	16.9117	25.9346	19.2908
805	144.573	42.3351	2.33808	14.7027	16.7222	26.5151	18.7275	139.62	33.4313	-4.57359	15.3562	16.8295	25.8908	19.0587
806	143.944	41.887	1.83951	14.9685	16.7798	26.5049	18.6483	139.462	32.6052	-4.62245	15.6325	16.7309	25.8566	18.7949
807	143.885	41.7349	1.87848	15.1524	16.7499	26.6063	18.4072	139.357	31.817	-4.48508	15.9086	16.6162	25.8311	18.5127
808	143.141	41.1555	2.19181	15.3067	16.6333	26.6197	18.1308	139.229	31.059	-4.1124	16.1645	16.4968	25.8142	18.2278
809	142.72	40.6123	2.13452	15.4729	16.6453	26.5893	18.0623	139.039	30.3293	-3.49327	16.3783	16.3928	25.8096	17.9532
810	141.972	39.8305	2.02914	15.6258	16.501	26.5801	17.7286	138.801	29.6348	-2.65579	16.5322	16.3258	25.8241	17.6953
811	140.273	38.9901	2.38893	15.818	16.3786	26.6262	17.429	138.57	28.991	-1.66111	16.6189	16.3104	25.8659	17.455
812	139.059	38.2174	2.80407	15.8673	16.2371	26.5866	17.1747	138.421	28.4178	-0.592282	16.6444	16.3472	25.9425	17.2289
813	138.409	37.8328	2.86184	15.9731	16.1578	26.6046	17.0371	138.417	27.9351	0.459431	16.6262	16.4211	26.0588	17.013
814	138.999	37.3769	3.49092	16.0567	15.9867	26.6117	16.6494	138.577	27.5587	1.4084	16.5867	16.5054	26.2174	16.805
815	138.935	35.7924	4.66653	16.0436	15.7882	26.5369	16.4223	138.866	27.298	2.18738	16.5441	16.5702	26.4189	16.6057
816	138.129	35.191	5.57874	16.1533	15.6889	26.6398	16.1751	139.212	27.1574	2.75838	16.5053	16.5919	26.6628	16.4198
817	136.811	34.8973	6.29655	16.1972	15.6341	26.7347	15.9176	139.527	27.138	3.11947	16.4635	16.5606	26.9472	16.2559
818	136.749	34.5126	6.28139	16.1965	15.607	26.8851	15.8995	139.745	27.2401	3.30517	16.4023	16.4819	27.2671	16.1272
819	136.888	34.2006	6.48398	16.209	15.5891	27.0773	15.8224	139.848	27.4643	3.37866	16.3035	16.3739	27.6122	16.0514
820	136.636	33.7147	6.61602	16.2085	15.591	27.262	15.8861	139.867	27.8102	3.41604	16.1577	16.2602	27.965	16.0499
821	136.592	33.2461	6.72081	16.1843	15.6371	27.388	16.0009	139.871	28.2745	3.48573	15.9707	16.1618	28.3016	16.1441
822	136.261	32.9773	6.41902	16.1056	15.5856	27.4776	16.1917	139.927	28.847	3.62846	15.7643	16.0918	28.5938	16.3507
823	136.802	32.8747	6.08548	16.1337	15.4992	27.568	16.5607	140.067	29.5089	3.8447	15.5709	16.053	28.8148	16.6751
824	136.81	32.4727	6.68332	16.1098	15.5004	27.6138	16.9282	140.262	30.2321	4.09414	15.4228	16.0403	28.9443	17.1061
825	137.082	32.1226	6.04782	16.2275	15.5009	27.4101	17.2325	140.427	30.9818	4.30867	15.3423	16.0437	28.9727	17.6142
826	136.394	31.5453	7.21654	16.1851	15.2541	27.2929	17.5671	140.448	31.7212	4.41507	15.3353	16.0526	28.902	18.1545
827	136.485	31.5095	7.51623	16.3405	15.1327	27.297	17.8325	140.226	32.4171	4.35993	15.392	16.0572	28.7433	18.6749
828	138.012	31.7963	6.66402	16.5145	15.0478	27.1973	18.2018	139.723	33.0456	4.128	15.4926	16.0488	28.5123	19.1266
829	138.229	32.467	5.05026	16.3625	15.0113	26.9258	18.5988	138.987	33.5943	3.74788	15.6158	16.0194	28.224	19.4746
830	138.65	32.9021	4.83461	16.3907	15.0915	26.8693	18.9921	138.149	34.0625	3.28288	15.7466	15.9619	27.8885	19.704
831	138.874	33.0832	4.91365	16.3751	15.1516	26.5276	19.1776	137.388	34.4582	2.81038	15.8795	15.8717	27.5108	19.8223
832	139.136	33.3435	4.84404	16.486	15.1025	26.1912	19.3077	136.877	34.7941	2.39763	16.0174	15.7493	27.0918	19.8544
833	140.087	33.6124	5.21272	16.3252	15.0944	25.8128	19.3327	136.74	35.0829	2.08311	16.1664	15.6016	26.6329	19.8338
834	140.842	34.0098	4.3927	16.4962	15.0785	25.4839	19.4721	137.014	35.3359	1.86953	16.3309	15.4424	26.1394	19.793
835	140.971	33.2941	3.79624	17.0273	15.0624	24.6462	19.5992	137.658	35.5623	1.72966	16.511	15.2884	25.6234	19.755
836	142.684	33.8759	3.64364	17.2726	15.0111	24.3503	19.5822	138.574	35.7711	1.62154	16.7031	15.1543	25.1033	19.7296
837	143.378	34.323	4.03207	17.5684	15.008	24.1151	19.563	139.655	35.9733	1.50653	16.9031	15.0474	24.6022	19.7142
838	144.585	35.1858	4.29963	17.7105	14.8776	23.8468	19.5213	140.818	36.1824	1.36262	17.1096	14.965	24.1444	19.6976
839	146.791	35.8353	3.81275	17.9435	14.8052	23.4304	19.4094	142.027	36.4127	1.18865	17.3245	14.8961	23.7521	19.6673
840	147.202	36.1397	4.1379	18.2676	14.8992	22.7721	19.4787	143.287	36.676	0.999341	17.5515	14.8263	23.4428	19.6144
841	147.343	35.9716	4.07111	18.2386	14.9668	22.5383	19.4747	144.624	36.9777	0.81486	17.7919	14.7453	23.2274	19.5369
842	147.506	35.8707	3.71534	18.592	14.9827	21.9352	19.6066	146.052	37.3149	0.650176	18.0409	14.6515	23.1104	19.4397
843	148.674	36.6381	4.00615	18.7126	14.9101	22.0052	19.489	147.556	37.6773	0.509087	18.2862	14.554	23.0894	19.3321
844	150.018	36.6429	3.27032	19.2023	14.9881	21.6383	19.568	149.083	38.0518	0.385119	18.5107	14.4675	23.1562	19.2241
845	150.987	37.4842	3.06734	19.3321	15.0485	21.8608	19.4662	150.555	38.4294	0.267838	18.6975	14.4063	23.2972	19.1227
846	151.62	38.337	2.90265	19.4579	15.0888	22.0022	19.3624	151.892	38.8116	0.150623	18.8355	14.3769	23.4957	19.0298
847	151.712	38.7892	1.86201	19.5118	15.2466	22.389	19.1713	153.036	39.2133	0.0357223	18.9222	14.3747	23.7334	18.9424
848	153.506	39.2398	1.38356	19.6409	15.2236	22.5735	19.1148	153.96	39.6607	-0.0659364	18.9631	14.3864	23.9941	18.8543
849	153.669	39.9417	2.09977	19.5181	15.3194	23.0012	18.9362	154.673	40.1832	-0.139947	18.9671	14.3962	24.2653	18.759
850	154.385	40.7904	2.74665	19.4972	15.3881	23.4507	18.7927	155.2	40.8036	-0.175948	18.9407	14.3947	24.5405	18.652
851	154.458	40.8797	3.08941	19.5787	15.3462	23.4751	18.8971	155.576	41.527	-0.173733	18.8835	14.384	24.8178	18.5329
852	154.684	40.8429	3.12099	19.6771	15.4659	23.5441	19.0304	155.819	42.3355	-0.145111	18.7881	14.3787	25.0977	18.4057
853	155	41.3037	2.93554	19.6413	15.4914	23.9521	18.928	155.934	43.1883	-0.110743	18.6439	14.4002	25.3789	18.2775
854	155.244	40.8779	3.30777	19.643	15.4957	24.1894	18.7432	155.908	44.0299	-0.0933336	18.4436	14.4685	25.6549	18.1566
855	156.514	41.2968	2.92181	19.6961	15.4423	24.5223	18.5581	155.729	44.8021	-0.11025	18.1886	14.5927	25.9134	18.0502
856	157.318	42.2362	3.33756	19.571	15.4846	24.6994	18.4942	155.393	45.4577	-0.168508	17.8917	14.7667	26.1374	17.9625
857	156.996	42.3712	3.16514	19.3386	15.6397	24.8567	18.457	154.918	45.9709	-0.263464	17.5745	14.9702	26.3111	17.8933
858	158.629	42.7282	3.70069	19.1995	15.5464	25.0549	18.2558	154.339	46.3414	-0.381103	17.2611	15.1754	26.4253	17.8392
859	158.815	43.3179	3.42843	18.9572	15.6197	25.1863	18.2176	153.707	46.5913	-0.502701	16.9709	15.3563	26.4824	17.7951
860	159.329	43.3279	3.45072	18.819	15.5212	25.2907	18.1739	153.072	46.7572	-0.609678	16.7136	15.4968	26.4966	17.7568
861	160.292	42.9188	3.63213	18.5494	15.4024	25.0189	17.9527	152.473	46.8782	-0.686859	16.4877	15.5942	26.4899	17.7244
862	161.047	43.6157	4.51661	18.0739	15.3416	25.4465	17.805	151.931	46.9862	-0.723635	16.2841	15.6585	26.4844	17.7045
863	160.211	43.909	4.71543	17.8896	15.4518	25.5175	17.8529	151.442	47.0993	-0.713783	16.0917	15.7058	26.4938	17.7111
864	159.593	43.848	5.22403	18.0187	15.3908	25.5363	17.7514	150.987	47.2209	-0.654969	15.903	15.7519	26.5183	17.7628
865	159.665	43.5549	4.39428	17.6804	15.5573	25.6578	17.7745	150.542	47.3431	-0.54846	15.7161	15.8056	26.545	17.8795
866	159.292	43.7261	4.35266	17.5785	15.589	25.6938	17.7882	150.087	47.4536	-0.399227	15.5334	15.8664	26.5539	18.0758
867	160.066	44.1855	3.84738	17.5674	15.484	25.6352	17.8307	149.616	47.5416	-0.216646	15.3569	15.9245	26.5281	18.3556
868	159.683	44.6783	3.4851	17.0625	15.5691	25.5993	18.0657	149.145	47.6028	-0.0151056	15.1843	15.9654	26.4621	18.709
869	158.563	44.7128	2.98991	16.9517	15.5245	25.6053	18.2859	148.697	47.6399	0.186715	15.0072	15.9749	26.3666	19.1125
870	158.219	44.7904	2.97745	16.8028	15.4736	25.5979	18.1872	148.297	47.6603	0.368108	14.8135	15.9443	26.2661	19.5331
871	157.459	44.6091	2.48409	16.5809	15.4514	25.7167	18.1837	147.959	47.6722	0.509993	14.5926	15.8728	26.1901	19.9357
872	158.742	45.0863	2.28319	16.5601	15.3325	25.7158	18.2017	147.675	47.6811	0.599976	14.3418	15.7685	26.1622	20.2907
873	158.559	45.5034	2.0488	16.2568	15.3814	25.8531	18.3855	147.421	47.6874	0.637754	14.0696	15.6457	26.1916	20.5807
874	158.75	45.5714	1.97913	16.0914	15.3535	25.8548	18.4769	147.163	47.6876	0.63896	13.795	15.5211	26.2704	20.8033
875	159.469	45.9284	2.49557	15.7603	15.254	25.8469	18.5238	146.876	47.6764	0.635691	13.5413	15.409	26.3774	20.9699
876	159.905	46.4379	1.72921	15.6686	15.1602	26.0062	18.731	146.563	47.6504	0.67199	13.3282	15.318	26.4867	21.0999
877	159.16	45.8259	0.998032	15.5435	15.0778	26.0331	18.8137	146.264	47.6099	0.793452	13.1641	15.2496	26.5776	21.2147
878	158.814	46.8867	0.789322	15.2986	15.0854	26.3001	18.9133	146.049	47.5586	1.03291	13.0437	15.199	26.6397	21.3309
879	158.587	47.0468	1.02657	15.1392	15.1683	26.4514	19.1228	146.002	47.5009	1.39682	12.9503	15.1589	26.673	21.4562
880	158.496	46.776	0.567942	15.0402	15.293	26.5188	19.325	146.187	47.4383	1.85751	12.8629	15.123	26.6838	21.5882
881	157.491	46.645	1.05865	14.9646	15.1275	26.4966	19.3043	146.616	47.3667	2.35524	12.7647	15.0896	26.6773	21.7167
882	157.283	46.7294	1.12022	14.9521	15.1151	26.6476	19.481	147.233	47.2754	2.81202	12.649	15.0618	26.6543	21.8272
883	156.315	45.991	1.60453	15.1697	15.0142	26.5991	19.3448	147.917	47.151	3.15395	12.5209	15.0454	26.6105	21.9061
884	156.278	46.1905	1.48013	15.0299	15.2683	26.5685	19.6541	148.516	46.9822	3.33462	12.3942	15.0451	26.5408	21.9443
885	156.219	46.4072	1.30385	14.8492	15.3268	26.5692	19.7441	148.898	46.7654	3.35033	12.2839	15.0605	26.4459	21.9401
886	155.859	46.2892	0.368434	14.6653	15.5264	26.6179	19.9572	149.002	46.5084	3.23957	12.2008	15.0846	26.3352	21.8993
887	154.433	45.8658	0.50095	14.8558	15.575	26.5872	20.1117	148.863	46.2297	3.06536	12.1471	15.1057	26.2264	21.8335
888	154.658	45.7923	0.024001	15.1048	15.5145	26.7628	19.9584	148.612	45.9535	2.8862	12.1176	15.1127	26.1402	21.7573
889	154.832	45.3145	-0.384202	15.1818	15.5804	26.6336	20.1653	148.428	45.7019	2.72704	12.1038	15.1014	26.0931	21.6838
890	154.701	45.8288	-1.42626	14.9766	15.7547	26.7373	20.275	148.466	45.4877	2.56248	12.0981	15.0784	26.0903	21.6211
891	153.018	45.6237	-1.11614	14.9501	16.0016	26.753	20.3494	148.793	45.3096	2.32063	12.0981	15.0619	26.1249	21.571
892	152.306	44.5844	-0.804916	14.9731	15.8565	26.5995	20.5221	149.339	45.1528	1.90797	12.1069	15.0769	26.1803	21.5291
893	152.147	44.1469	0.245253	15.1439	15.782	26.457	20.674	149.91	44.9939	1.24642	12.1304	15.1463	26.2374	21.4875
894	153.065	44.4006	-0.349637	15.2498	15.7582	26.3191	20.6502	150.24	44.8079	0.308403	12.1734	15.2832	26.2821	21.4391
895	153.215	44.924	-0.325166	15.0235	15.9263	26.3086	20.4945	150.079	44.5762	-0.863998	12.2357	15.4848	26.3091	21.3813
896	153.262	45.4505	-0.545381	14.707	15.9268	26.219	20.6311	149.287	44.2901	-2.16422	12.3109	15.7317	26.3219	21.317
897	152.032	45.0115	-1.43205	14.6525	15.9812	26.0875	20.7289	147.883	43.9516	-3.44925	12.3881	15.9939	26.3279	21.253
898	152.456	44.9152	-2.14963	14.6501	16.0598	26.0558	20.8699	146.059	43.5699	-4.58015	12.4547	16.2389	26.3331	21.1958
899	152.893	44.6099	-2.59972	14.3503	16.2171	26.1711	20.8536	144.12	43.1562	-5.46005	12.5002	16.4408	26.3373	21.1468
900	151.242	44.6577	-2.51225	14.306	16.3643	26.0586	20.7196	142.399	42.7192	-6.05567	12.5192	16.5864	26.3342	21.0996
901	151.878	44.2973	-2.13875	14.2501	16.5599	26.0466	20.6951	141.158	42.263	-6.39598	12.5117	16.6763	26.3145	21.0411

## Sheet: Figure 2b
Figure 2b
			Variable
	Subject	Fold	Sagittal Flexion	Protrusion	Roll	Length (Anterior)	Width (Anterior)	Length (Middle)	Width (Middle)
	Monkey R	1	0.750773	0.726173	0.806904	0.681865	0.67263	0.51687	0.715181
	Monkey R	2	0.78644	0.826483	0.902348	0.756409	0.742379	0.510342	0.784674
	Monkey R	3	0.754584	0.768355	0.879165	0.738331	0.771506	0.5102	0.794328
	Monkey R	4	0.746252	0.747019	0.886948	0.704514	0.769407	0.218939	0.789887
	Monkey R	5	0.705194	0.763334	0.816591	0.766353	0.715643	0.435795	0.771142
	Monkey R	6	0.747485	0.82285	0.8056	0.734348	0.69329	0.487861	0.7698
	Monkey Y	1	0.431309	0.303717	0.73812	0.402181	0.557096	0.426801	0.453872
	Monkey Y	2	0.511325	0.542611	0.717447	0.610665	0.648754	0.50911	0.493706
	Monkey Y	3	0.566475	0.624847	0.734953	0.577913	0.726063	0.612292	0.507401
	Monkey Y	4	0.5235	0.57461	0.684884	0.5629	0.588633	0.445651	0.388744
	Monkey Y	5	0.562551	0.642732	0.73302	0.604333	0.662999	0.580553	0.462806
	Monkey Y	6	0.504421	0.585982	0.731482	0.543121	0.627628	0.500657	0.293129

## Sheet: Figure 3a
Figure 3a
	Variable
	Decoded							Real
Frame	Shape PC1	Shape PC2	Shape PC3	Shape PC4	Shape PC5	Shape PC6	Shape PC7	Shape PC1	Shape PC2	Shape PC3	Shape PC4	Shape PC5	Shape PC6	Shape PC7
1	2.65338	1.74437	-1.11792	-0.948102	0.622669	0.108179	-0.144516	2.63418	2.11159	-0.752974	-0.800422	-0.580074	-0.690481	0.245068
2	2.46888	1.69853	-0.719275	-1.09357	0.668062	0.0238072	-0.0734766	2.48138	2.01338	-0.603804	-0.865521	-0.342896	-0.860357	0.374874
3	2.4623	1.66248	-0.532343	-1.06853	0.66658	0.00836798	-0.121066	2.28717	1.92049	-0.442412	-0.977915	-0.0806166	-0.990265	0.438775
4	2.13758	1.56963	-0.24631	-1.32954	0.596151	-0.232066	0.0462192	2.0633	1.83935	-0.256124	-1.11774	0.168489	-1.09316	0.452026
5	2.04387	1.76835	0.262374	-1.30676	0.691885	-0.370673	0.0097933	1.82419	1.77522	-0.0353962	-1.25978	0.36858	-1.18476	0.434451
6	1.90989	1.84508	0.625358	-1.33118	0.652773	-0.510558	-0.050995	1.58854	1.73038	0.222219	-1.38052	0.496373	-1.27665	0.403251
7	1.74048	1.91252	1.13672	-1.39982	0.612023	-0.62097	-0.104065	1.37801	1.70196	0.509759	-1.46413	0.546175	-1.37096	0.36856
8	1.61558	1.87384	1.59903	-1.5855	0.45923	-0.69935	-0.0589624	1.21345	1.68088	0.811219	-1.50558	0.528923	-1.45897	0.332625
9	1.50848	2.02671	1.93505	-1.72835	0.472072	-0.769616	-0.0532726	1.11072	1.65302	1.10475	-1.50995	0.466279	-1.52482	0.291945
10	1.3709	1.88951	2.3652	-1.92078	0.366941	-0.801034	-0.0817014	1.07788	1.60305	1.36774	-1.48867	0.382211	-1.55288	0.24091
11	1.50906	1.90595	2.59766	-1.93946	0.37327	-0.769242	-0.09516	1.11448	1.51968	1.58197	-1.4545	0.29532	-1.53622	0.175579
12	1.39108	1.75527	2.7004	-1.84744	0.25394	-0.718379	-0.153445	1.2128	1.40019	1.73705	-1.41691	0.214772	-1.48237	0.0961857
13	1.4101	1.63309	3.00598	-2.05751	0.173596	-0.723821	-0.249742	1.35994	1.25217	1.83132	-1.37928	0.140675	-1.41356	0.00737736
14	1.51693	1.68815	2.89047	-2.02589	0.1012	-0.702703	-0.281735	1.53968	1.09097	1.86985	-1.3383	0.067952	-1.36065	-0.0836258
15	1.59829	1.63013	3.0827	-2.10319	0.0502989	-0.69332	-0.324759	1.7336	0.933534	1.86091	-1.28537	-0.00835691	-1.3529	-0.169961
16	1.75416	1.42226	2.93133	-2.24074	-0.15757	-0.707621	-0.444601	1.92211	0.790579	1.81189	-1.2089	-0.0891353	-1.40722	-0.248304
17	1.85374	1.25035	2.83812	-2.17274	-0.300483	-0.686184	-0.470246	2.08624	0.660838	1.72595	-1.09686	-0.17044	-1.52129	-0.321317
18	1.96771	1.11112	2.77963	-1.98023	-0.414988	-0.601828	-0.502546	2.21029	0.529864	1.59995	-0.938887	-0.24584	-1.67349	-0.397909
19	2.12865	0.748947	2.29299	-1.70954	-0.615587	-0.447151	-0.659682	2.28475	0.374747	1.42447	-0.728148	-0.310113	-1.82975	-0.490521
20	2.44538	0.558476	2.03769	-1.46369	-0.667433	-0.389016	-0.647222	2.3081	0.173538	1.18677	-0.46306	-0.36192	-1.95467	-0.609659
21	2.80491	0.45304	1.31813	-0.975627	-0.581307	-0.249635	-0.694979	2.28604	-0.0842631	0.876395	-0.149054	-0.403492	-2.0224	-0.756965
22	2.75341	0.32631	0.715653	-0.71127	-0.629243	-0.35197	-0.516221	2.2276	-0.390668	0.492615	0.200035	-0.437145	-2.02352	-0.919473
23	2.89818	-0.0381289	0.210748	-0.385986	-0.720532	-0.055178	-0.522743	2.13945	-0.718911	0.0516736	0.561902	-0.460508	-1.96532	-1.06833
24	2.9372	-0.415621	-0.284506	0.293332	-0.756253	-0.00083568	-0.504632	2.02076	-1.03078	-0.409116	0.907994	-0.463442	-1.8665	-1.164
25	2.89309	-0.678209	-0.584549	0.790736	-0.677238	0.103184	-0.451537	1.86137	-1.28897	-0.833501	1.20844	-0.429095	-1.74878	-1.16765
26	2.96398	-0.89888	-0.992075	1.11668	-0.702373	0.305948	-0.333265	1.64473	-1.46924	-1.15591	1.43904	-0.339705	-1.62943	-1.05567
27	2.47461	-1.08264	-1.39985	1.3457	-0.669375	0.332071	-0.224405	1.35534	-1.56657	-1.31717	1.58819	-0.185412	-1.51763	-0.832146
28	2.11207	-1.54053	-1.67695	2.11328	-0.66511	0.369017	-0.155738	0.987898	-1.59232	-1.28232	1.66118	0.0276792	-1.41548	-0.533843
29	1.63033	-1.43898	-1.6497	2.54263	-0.494787	0.240509	0.0417476	0.554104	-1.56319	-1.05434	1.67961	0.274176	-1.32204	-0.224305
30	1.239	-1.54906	-1.60596	2.57627	-0.357199	0.218623	0.177555	0.0839295	-1.48674	-0.67816	1.67519	0.512991	-1.23756	0.0224715
31	0.899987	-1.49009	-1.41928	2.629	-0.283576	0.159648	0.180922	-0.380165	-1.3504	-0.232084	1.67955	0.697153	-1.16569	0.144123
32	0.398887	-1.37947	-1.29865	2.53833	-0.163864	0.00396149	0.239805	-0.794321	-1.12015	0.191701	1.71353	0.786805	-1.11249	0.110168
33	0.00286536	-0.998882	-1.28448	2.2388	-0.0842653	-0.278976	0.31465	-1.12563	-0.751226	0.511386	1.78	0.761024	-1.08283	-0.0672068
34	-0.531602	-0.894595	-1.09539	2.09912	-0.00698292	-0.303684	0.200128	-1.36094	-0.207494	0.67653	1.86283	0.624152	-1.07665	-0.336197
35	-0.734052	-0.551578	-1.08571	1.81902	-0.0303142	-0.349166	0.058395	-1.50865	0.517933	0.678572	1.93274	0.404385	-1.08703	-0.621545
36	-1.3604	-0.133032	-0.964867	1.63107	0.0484381	-0.348268	-0.150486	-1.59279	1.38963	0.547504	1.95791	0.14533	-1.10142	-0.848137
37	-1.72406	0.404192	-1.05628	1.37443	0.0336659	-0.420399	-0.278637	-1.6419	2.33061	0.336578	1.91508	-0.106394	-1.10569	-0.963601
38	-1.83195	0.941244	-0.985688	1.26765	-0.0279675	-0.411201	-0.502376	-1.67735	3.23802	0.101388	1.79732	-0.313473	-1.08887	-0.952071
39	-2.11349	1.40037	-1.15671	1.29242	-0.198481	-0.26377	-0.657844	-1.70551	4.00889	-0.118504	1.61573	-0.456387	-1.04645	-0.834985
40	-2.0496	2.15726	-0.992153	1.10957	-0.301188	-0.113483	-0.830522	-1.71666	4.56706	-0.308806	1.39515	-0.535889	-0.98102	-0.659815
41	-2.10497	2.97994	-0.984328	0.998621	-0.439371	-0.0986107	-0.899915	-1.69023	4.88174	-0.478172	1.16596	-0.569398	-0.900028	-0.482067
42	-1.98514	3.60888	-1.01698	0.810571	-0.458671	-0.0232996	-0.989248	-1.60391	4.97186	-0.646772	0.955526	-0.583011	-0.811947	-0.347763
43	-1.96275	4.185	-1.10312	0.618447	-0.582729	0.125126	-1.10749	-1.44249	4.8955	-0.831621	0.782212	-0.601853	-0.722587	-0.282447
44	-1.96662	4.66313	-0.980553	0.673747	-0.597876	0.16421	-1.2371	-1.20298	4.72937	-1.03535	0.653454	-0.641668	-0.63301	-0.289239
45	-1.74421	4.84221	-1.10106	0.693349	-0.737745	0.325745	-1.39885	-0.894623	4.54607	-1.24295	0.567167	-0.703999	-0.539557	-0.354603
46	-1.58929	5.13159	-1.32119	0.604446	-0.839695	0.370753	-1.6188	-0.534543	4.39693	-1.42717	0.51499	-0.776081	-0.435575	-0.457694
47	-1.26295	4.96808	-1.59201	0.477569	-0.937507	0.523716	-1.58207	-0.141638	4.30488	-1.55938	0.485564	-0.835254	-0.313907	-0.57866
48	-0.813179	4.92629	-1.77243	0.415187	-0.828037	0.672342	-1.64266	0.268516	4.26743	-1.62077	0.466684	-0.856553	-0.169251	-0.702801
49	-0.392133	4.92695	-1.74182	0.293553	-0.810413	0.74432	-1.67608	0.685691	4.26632	-1.60893	0.44637	-0.821168	0.000108553	-0.820099
50	0.042289	4.71178	-1.80902	0.138057	-0.812234	0.754798	-1.69203	1.10365	4.27865	-1.53738	0.413691	-0.72307	0.191218	-0.921873
51	0.396381	4.45716	-1.8682	0.0941113	-0.612875	0.808421	-1.62356	1.51663	4.28511	-1.42866	0.360106	-0.571602	0.39594	-0.997386
52	0.848928	4.14199	-1.97023	0.0752133	-0.591102	0.989425	-1.55699	1.91563	4.2734	-1.30425	0.28133	-0.389186	0.60106	-1.03272
53	1.33108	4.13497	-1.83411	0.067968	-0.439493	1.00405	-1.54342	2.28635	4.23752	-1.17592	0.179023	-0.204822	0.789354	-1.0127
54	1.87226	3.93205	-1.88428	0.111364	-0.274751	1.0939	-1.49357	2.60965	4.17503	-1.0417	0.0612419	-0.0454475	0.941942	-0.924917
55	2.34701	3.66402	-1.84972	0.154129	-0.182021	1.09326	-1.39356	2.86441	4.08489	-0.888173	-0.0591202	0.0719277	1.04174	-0.764214
56	2.78136	3.33416	-1.89538	-0.0215687	-0.0353177	1.18911	-1.363	3.0319	3.96702	-0.697428	-0.167736	0.14465	1.0773	-0.535485
57	2.98931	3.23358	-1.63129	-0.193785	0.2622	1.07643	-1.12553	3.10024	3.82337	-0.455965	-0.252777	0.184136	1.04589	-0.253937
58	3.28146	3.13523	-1.54223	-0.266923	0.505447	1.09511	-1.06519	3.06771	3.6593	-0.161772	-0.307811	0.211327	0.954645	0.0571719
59	3.28896	3.07532	-1.15658	-0.340019	0.815882	0.968074	-0.849619	2.94412	3.48387	0.172966	-0.332728	0.249626	0.818855	0.370463
60	3.01302	2.82131	-0.630936	-0.379583	1.02659	0.876321	-0.617171	2.75032	3.30863	0.524506	-0.332676	0.317831	0.658024	0.659053
61	2.52443	2.82449	-0.105247	-0.631018	1.14284	0.642744	-0.370738	2.5155	3.14515	0.864508	-0.315827	0.425392	0.491042	0.900802
62	2.01315	3.00987	0.138003	-0.80635	1.28082	0.535589	-0.058456	2.27254	3.0022	1.16872	-0.291411	0.571146	0.332191	1.08145
63	1.95017	2.75124	0.502203	-0.901296	1.2469	0.558872	0.0477396	2.05242	2.88398	1.42424	-0.269244	0.745265	0.189234	1.19629
64	1.87397	2.51151	0.836622	-0.970897	1.23342	0.553719	0.237494	1.87856	2.7898	1.6329	-0.260597	0.933094	0.0640741	1.25026
65	1.79505	2.47861	0.992032	-0.952885	1.27566	0.539843	0.381999	1.76217	2.71545	1.80981	-0.279132	1.11921	-0.0447547	1.25616
66	1.63052	2.37162	1.50666	-0.958134	1.26632	0.542023	0.46906	1.69992	2.65513	1.97783	-0.34048	1.29029	-0.139265	1.23129
67	1.45918	2.26334	1.72921	-1.00206	1.21778	0.413819	0.550958	1.67513	2.60348	2.15979	-0.459579	1.43605	-0.220335	1.19321
68	1.44009	2.16331	2.03956	-1.17062	1.25504	0.211011	0.566471	1.6622	2.5568	2.37122	-0.645922	1.5488	-0.287725	1.15562
69	1.33442	2.08479	2.28206	-1.24936	1.10383	0.000923296	0.596577	1.6335	2.51324	2.61573	-0.898266	1.62276	-0.34135	1.12519
70	1.16451	1.95373	2.55151	-1.26189	1.02128	-0.0477331	0.631852	1.56694	2.47237	2.88458	-1.20127	1.65378	-0.382768	1.10045
71	1.12372	1.94756	2.6507	-1.35997	0.931824	-0.184042	0.604541	1.45213	2.43435	3.1601	-1.52626	1.63956	-0.415778	1.07318
72	1.15522	1.88576	2.80113	-1.38943	0.952317	-0.321753	0.596	1.2931	2.39922	3.42172	-1.83658	1.58051	-0.445756	1.0319
73	1.20932	1.78997	3.09115	-1.39057	0.855666	-0.395422	0.459878	1.10715	2.36612	3.65238	-2.09638	1.48067	-0.477986	0.966018
74	1.16766	1.74086	3.18756	-1.43733	0.717554	-0.53413	0.365701	0.920077	2.33288	3.84336	-2.27993	1.34804	-0.515824	0.869239
75	1.23388	1.68976	3.11957	-1.43846	0.528763	-0.672886	0.228681	0.759586	2.29553	3.99596	-2.37846	1.19364	-0.559659	0.741326
76	1.37623	1.4397	3.31282	-1.58689	0.300124	-0.712075	0.00923497	0.648931	2.24808	4.11992	-2.40204	1.02956	-0.607143	0.587657
77	1.7442	1.50185	3.05573	-1.38024	0.132266	-0.663992	-0.15205	0.602887	2.18295	4.22894	-2.37607	0.866663	-0.654395	0.417153
78	1.97688	1.36179	2.89252	-1.35322	0.0139998	-0.536424	-0.363124	0.626739	2.09183	4.33446	-2.33319	0.71265	-0.697501	0.239694
79	2.26448	1.22543	2.78967	-1.38681	-0.188316	-0.472752	-0.518243	0.718011	1.96731	4.43961	-2.30338	0.571217	-0.73367	0.0641041
80	2.37077	1.22508	2.61793	-1.33733	-0.283453	-0.41818	-0.66454	0.869733	1.80504	4.53527	-2.30514	0.442705	-0.761644	-0.102595
81	2.50329	0.984967	2.54199	-1.32099	-0.455422	-0.287122	-0.790437	1.07367	1.60614	4.59951	-2.34074	0.325979	-0.781389	-0.254655
82	2.74869	0.784818	2.27871	-1.32506	-0.577264	-0.186586	-0.973131	1.32212	1.37864	4.60131	-2.39648	0.220651	-0.793523	-0.386578
83	3.00958	0.659102	1.79419	-1.30424	-0.685088	-0.13778	-1.05265	1.60796	1.13766	4.50807	-2.44763	0.128628	-0.798909	-0.492542
84	3.40788	0.327342	1.33889	-1.29606	-0.745023	0.0324232	-1.20078	1.92351	0.903818	4.29545	-2.46646	0.0542703	-0.798381	-0.566679
85	3.73947	0.194634	0.941738	-1.09846	-0.798634	0.0424732	-1.26379	2.25934	0.699977	3.95628	-2.43118	0.00312441	-0.792438	-0.604159
86	3.84392	0.109381	0.610869	-0.966529	-0.72451	0.00494708	-1.2583	2.60366	0.546702	3.50584	-2.33307	-0.0203161	-0.780911	-0.602673
87	4.10489	0.0490732	0.189059	-0.80297	-0.809734	0.0934512	-1.31333	2.94297	0.457841	2.98115	-2.17954	-0.0149187	-0.762672	-0.563593
88	4.2577	-0.0782753	-0.19609	-0.674458	-0.710898	0.0631203	-1.23584	3.26371	0.437286	2.43359	-1.99225	0.0159184	-0.73557	-0.492187
89	4.45718	-0.178912	-0.480686	-0.57526	-0.656754	0.0590757	-1.09426	3.55412	0.477922	1.91623	-1.80042	0.0649272	-0.69714	-0.396842
90	4.49053	-0.172146	-0.86373	-0.385663	-0.520996	0.0522962	-0.859914	3.80509	0.563223	1.46991	-1.63159	0.123119	-0.646405	-0.287493
91	4.35087	-0.291938	-1.04523	-0.321547	-0.498513	-0.042116	-0.542254	4.00991	0.671094	1.11231	-1.50257	0.182425	-0.586311	-0.173596
92	4.2166	-0.362674	-1.17955	-0.141173	-0.375778	-0.0605351	-0.426201	4.16299	0.778869	0.834136	-1.41373	0.237714	-0.525591	-0.062253
93	4.23342	-0.408814	-1.27785	-0.230742	-0.258576	-0.200995	-0.228486	4.25872	0.868089	0.603733	-1.34841	0.287285	-0.478732	0.0429095
94	4.07568	-0.353459	-1.37122	-0.210284	-0.167415	-0.327219	-0.082815	4.29138	0.927698	0.378833	-1.27836	0.331547	-0.463251	0.14189
95	3.75303	-0.423753	-1.50879	-0.0303505	-0.014956	-0.369563	-0.0119742	4.25674	0.954856	0.12142	-1.17303	0.370626	-0.494662	0.237653
96	3.6945	-0.410646	-1.6884	-0.0238974	-0.0370671	-0.430793	0.0875413	4.15491	0.95344	-0.189233	-1.0096	0.402274	-0.580755	0.334954
97	3.5699	-0.492157	-1.85909	0.359935	-0.0787397	-0.396485	0.00919038	3.99308	0.931077	-0.549734	-0.780162	0.421362	-0.717425	0.439013
98	3.6073	-0.416927	-1.85758	0.499964	0.0349535	-0.399701	0.119337	3.78658	0.896006	-0.93397	-0.493608	0.421528	-0.887931	0.554313
99	3.50398	-0.402413	-1.77505	0.441381	0.129055	-0.453505	0.142953	3.55692	0.854961	-1.3017	-0.172065	0.3985	-1.06628	0.683722
100	3.44168	-0.246334	-1.8957	0.497201	0.304815	-0.513286	0.346294	3.32673	0.812645	-1.61102	0.156503	0.353729	-1.22388	0.828225
101	3.20456	-0.150093	-1.89927	0.463997	0.405326	-0.550061	0.430681	3.11319	0.772553	-1.83047	0.466223	0.296648	-1.33719	0.987425
102	3.14858	-0.0930221	-1.88586	0.504838	0.509438	-0.553771	0.511702	2.92201	0.738409	-1.94696	0.738721	0.244241	-1.39374	1.16053
103	2.95125	0.0952562	-1.92871	0.638543	0.578322	-0.651481	0.652849	2.74486	0.715069	-1.96765	0.964346	0.217555	-1.39432	1.34733
104	2.76877	0.0856915	-1.83432	0.693229	0.576037	-0.64756	0.672008	2.56154	0.707853	-1.91604	1.13969	0.236099	-1.35096	1.54863
105	2.56817	0.0113519	-1.72225	0.909234	0.795151	-0.784207	0.635583	2.34704	0.720193	-1.82446	1.26362	0.312131	-1.28196	1.76555
106	2.21078	0.262283	-1.75055	0.912817	0.828163	-0.857921	0.65948	2.08091	0.750712	-1.72566	1.33457	0.446961	-1.20622	1.99727
107	1.7415	0.617447	-1.61026	1.13474	0.915025	-0.984997	0.752618	1.75558	0.791357	-1.64576	1.35089	0.630632	-1.13901	2.23787
108	1.36936	0.845632	-1.57844	1.29086	1.05622	-0.955574	0.812006	1.3805	0.827943	-1.60023	1.31393	0.845064	-1.09026	2.47354
109	1.16148	1.19102	-1.43695	1.42556	1.14373	-1.05007	0.796526	0.979914	0.843773	-1.59312	1.23207	1.06943	-1.06534	2.68179
110	0.837371	1.44665	-1.4487	1.665	1.12497	-0.894141	0.563324	0.584858	0.825836	-1.61884	1.12291	1.28567	-1.06683	2.83366
111	0.442939	1.99768	-1.3708	1.83097	1.31038	-0.948331	0.629691	0.22192	0.771602	-1.66568	1.01153	1.48201	-1.09607	2.89937
112	0.0554593	2.53473	-1.34046	1.50847	1.49029	-1.03381	0.638624	-0.0970022	0.693619	-1.71988	0.924688	1.65332	-1.15343	2.85595
113	-0.260809	3.03808	-1.39051	1.46724	1.69608	-0.929101	0.761483	-0.37998	0.619662	-1.76963	0.882724	1.79844	-1.23715	2.69484
114	-0.62167	3.40257	-1.21474	1.40376	1.79121	-0.82986	0.695614	-0.653155	0.587467	-1.80813	0.892273	1.91595	-1.34158	2.4266
115	-0.986761	3.87632	-1.28417	1.20082	2.11128	-0.801179	0.932387	-0.95211	0.634967	-1.83531	0.942856	2.00038	-1.45623	2.08108
116	-1.43275	4.36822	-1.21708	1.10483	2.25009	-0.754933	0.986734	-1.3094	0.78877	-1.85773	1.00899	2.04072	-1.56647	1.70237
117	-1.93791	4.35473	-1.00556	1.09163	2.2899	-0.600234	0.911408	-1.74253	1.0547	-1.88662	1.0574	2.02212	-1.65582	1.33995
118	-2.20489	4.55265	-1.11604	0.988989	2.53312	-0.544161	0.864015	-2.24667	1.41373	-1.9345	1.05682	1.9304	-1.70911	1.03846
119	-2.46348	4.76716	-1.05876	0.748702	2.56177	-0.372052	0.981672	-2.79452	1.82503	-2.01129	0.987115	1.75758	-1.71548	0.829101
120	-2.88492	4.86759	-1.01419	0.688371	2.54817	-0.282207	0.843592	-3.34307	2.23535	-2.12118	0.844606	1.50632	-1.67001	0.72487
121	-3.15568	4.81631	-1.04679	0.578766	2.57756	-0.0643415	0.694623	-3.84486	2.59213	-2.26112	0.642223	1.19159	-1.57361	0.720428
122	-3.14409	4.76569	-1.14771	0.509365	2.48929	0.0468676	0.564068	-4.25972	2.85602	-2.42147	0.40477	0.838578	-1.43159	0.795804
123	-3.0566	4.63534	-1.32481	0.37377	2.51675	0.179554	0.517773	-4.56354	3.00933	-2.58848	0.161313	0.477467	-1.25186	0.922274
124	-3.17585	4.66344	-1.29012	0.410201	2.59897	0.247677	0.414458	-4.75144	3.05802	-2.74758	-0.0626249	0.136576	-1.04348	1.06845
125	-3.33567	4.63264	-1.508	0.397269	2.42798	0.453467	0.391902	-4.83523	3.02708	-2.88647	-0.2507	-0.163664	-0.81596	1.20526
126	-3.2571	4.23395	-1.9185	0.25828	2.37945	0.546488	0.321202	-4.83689	2.95166	-2.997	-0.397798	-0.414061	-0.57924	1.30934
127	-3.57121	4.24926	-2.07311	0.221855	2.34081	0.618889	0.172209	-4.78074	2.8667	-3.07558	-0.508371	-0.616435	-0.343675	1.36516
128	-3.66792	4.29474	-2.28836	0.0706741	2.37302	0.710324	-0.0143286	-4.6868	2.79861	-3.12243	-0.592205	-0.780165	-0.119458	1.36629
129	-4.01241	4.18679	-2.19623	0.0492711	2.40279	0.901868	-0.137579	-4.5671	2.76078	-3.14053	-0.659462	-0.916958	0.0848011	1.3161
130	-3.8628	3.89181	-2.37476	0.0176896	2.17682	1.05794	-0.281063	-4.42513	2.75371	-3.13478	-0.716657	-1.03592	0.263959	1.22754
131	-3.92401	3.8624	-2.4488	0.040653	2.18509	1.15602	-0.275958	-4.25773	2.76852	-3.1116	-0.764783	-1.14084	0.417737	1.12128
132	-3.42348	3.64697	-2.6346	0.103684	1.97884	1.57371	-0.30179	-4.05789	2.7924	-3.07902	-0.800136	-1.23044	0.550751	1.02174
133	-3.61561	3.32527	-2.6728	-0.0528224	1.82234	1.66674	-0.336591	-3.81742	2.8138	-3.04627	-0.81733	-1.30098	0.670902	0.951421
134	-3.36938	3.17024	-2.6792	-0.0933298	1.8236	1.81025	-0.432915	-3.52869	2.82619	-3.02246	-0.813137	-1.34956	0.78654	0.924605
135	-3.37227	3.13231	-2.53043	-0.170657	1.73902	1.82913	-0.388908	-3.18569	2.82928	-3.01429	-0.789534	-1.37646	0.903451	0.942462
136	-3.3061	2.97331	-2.66404	-0.251645	1.48039	2.00533	-0.490185	-2.78471	2.82804	-3.02363	-0.754674	-1.38541	1.0229	0.991561
137	-3.25619	3.00418	-2.5602	-0.41052	1.21775	2.04488	-0.347845	-2.32523	2.83002	-3.04579	-0.721361	-1.38144	1.14145	1.04687
138	-2.97568	2.97543	-2.45848	-0.407672	1.20811	2.04455	-0.412861	-1.81087	2.842	-3.06978	-0.703557	-1.36763	1.25248	1.07884
139	-2.77973	2.67841	-2.47541	-0.49294	1.02202	2.11198	-0.505452	-1.25054	2.86693	-3.08085	-0.712134	-1.34282	1.34875	1.06253
140	-2.3363	2.50255	-2.33734	-0.628516	0.89829	2.16183	-0.558663	-0.659199	2.90219	-3.06473	-0.75145	-1.30171	1.42462	0.985946
141	-2.03426	2.58777	-2.37122	-0.687668	0.720156	2.0264	-0.563966	-0.0575144	2.93963	-3.01218	-0.818088	-1.23787	1.47687	0.854666
142	-1.84456	2.41793	-2.24967	-0.735374	0.557443	2.06025	-0.612928	0.529708	2.96748	-2.92232	-0.902208	-1.14841	1.50386	0.691101
143	-1.30803	2.40439	-2.17489	-0.724731	0.346012	1.98757	-0.757078	1.07613	2.97375	-2.80297	-0.990779	-1.03808	1.50367	0.528568
144	-0.672952	2.41008	-2.12659	-0.816081	0.275519	1.99441	-0.832069	1.55722	2.95003	-2.66786	-1.07141	-0.920804	1.47258	0.402052
145	-0.0960749	2.26381	-2.07039	-0.852547	0.0692766	2.00471	-0.831358	1.95376	2.89448	-2.53178	-1.13545	-0.817116	1.40487	0.338802
146	0.508619	2.21714	-1.99972	-0.756647	-0.0419292	1.845	-0.852304	2.25466	2.81291	-2.40556	-1.17952	-0.748076	1.29448	0.35179
147	0.94777	2.05764	-1.92267	-0.706933	-0.111695	1.76133	-0.921894	2.45845	2.71751	-2.2928	-1.20503	-0.727944	1.13785	0.437819
148	1.35102	2.10819	-1.83556	-0.705132	-0.308145	1.48718	-0.87117	2.57322	2.62361	-2.18983	-1.21638	-0.75853	0.936564	0.580464
149	1.63176	2.06047	-1.97129	-0.737648	-0.480088	1.4789	-0.739728	2.61501	2.54537	-2.08901	-1.21872	-0.827474	0.69851	0.756347
150	1.88251	2.38606	-1.87691	-0.724485	-0.673983	1.27586	-0.656763	2.60479	2.49212	-1.98383	-1.21628	-0.911422	0.436543	0.942289
151	2.04358	2.17773	-1.80121	-0.720507	-0.765193	0.984322	-0.624012	2.56463	2.46629	-1.87366	-1.21183	-0.983147	0.165125	1.12091
152	2.41974	2.1796	-1.79693	-0.670331	-0.837557	0.868265	-0.422986	2.51388	2.46357	-1.7659	-1.20698	-1.01993	-0.103607	1.28316
153	2.42937	2.16399	-1.72326	-0.747433	-1.08052	0.502304	-0.369565	2.46596	2.47506	-1.67446	-1.20302	-1.01012	-0.362524	1.42754
154	2.19088	2.14317	-1.58451	-0.754767	-1.09594	0.255919	-0.115259	2.4266	2.49063	-1.61501	-1.20143	-0.955684	-0.609748	1.55708
155	2.1593	2.13568	-1.49324	-0.755793	-1.11912	-0.0749574	0.0823063	2.39397	2.50214	-1.59867	-1.20405	-0.870511	-0.846544	1.67569
156	2.09333	2.05774	-1.57313	-0.843732	-1.21487	-0.348863	0.273875	2.36052	2.50545	-1.6268	-1.21262	-0.775301	-1.07417	1.78542
157	2.1207	1.99845	-1.4051	-0.825956	-1.25288	-0.65761	0.411385	2.31591	2.50082	-1.68885	-1.22811	-0.691395	-1.29132	1.88566
158	2.29826	1.95422	-1.27787	-0.796921	-1.17912	-0.887525	0.558027	2.25034	2.49199	-1.76445	-1.24993	-0.635675	-1.49342	1.97415
159	2.10357	1.85757	-1.14958	-0.841688	-1.287	-1.32345	0.671128	2.15761	2.48451	-1.82898	-1.27579	-0.61783	-1.67402	2.04914
160	2.20232	1.92774	-1.06634	-0.891102	-1.27569	-1.62797	0.688644	2.03709	2.484	-1.86067	-1.3022	-0.640055	-1.82752	2.11154
161	1.82809	1.91621	-1.01012	-0.839748	-1.48319	-1.83024	0.710193	1.89447	2.49494	-1.84684	-1.32572	-0.69837	-1.95158	2.16633
162	1.83603	2.08325	-0.942864	-0.652626	-1.54055	-2.0916	0.739152	1.74097	2.51994	-1.78715	-1.34419	-0.784578	-2.04809	2.2225
163	1.54017	1.9572	-0.978901	-0.599843	-1.666	-2.31948	0.789637	1.59136	2.55953	-1.69283	-1.35782	-0.888161	-2.12224	2.29135
164	1.6989	2.05444	-0.923842	-0.522379	-1.68637	-2.50662	0.840561	1.46107	2.61201	-1.5826	-1.36938	-0.997974	-2.18046	2.38352
165	1.47819	2.05242	-0.78861	-0.458574	-1.71094	-2.60961	0.911794	1.363	2.67322	-1.47696	-1.38323	-1.10389	-2.22866	2.50541
166	1.7121	2.03441	-0.770526	-0.484916	-1.74468	-2.63152	1.0112	1.30454	2.73633	-1.393	-1.40335	-1.19848	-2.27185	2.65623
167	1.55987	1.82538	-0.648812	-0.419076	-1.45845	-2.90649	1.10319	1.28541	2.79184	-1.34112	-1.43073	-1.27863	-2.31528	2.82647
168	1.53948	1.73859	-0.400414	-0.328692	-1.50745	-3.04264	1.11534	1.29726	2.82844	-1.32456	-1.46133	-1.34649	-2.36622	2.99841
169	1.73984	1.7953	-0.443994	0.087816	-1.31969	-3.15061	1.18222	1.32538	2.83471	-1.34119	-1.48555	-1.40914	-2.43461	3.14927
170	1.80515	1.79231	-0.627527	0.380321	-1.25111	-3.26216	1.35226	1.35248	2.80136	-1.38625	-1.48988	-1.47625	-2.53136	3.25615
171	1.85603	1.83123	-0.517703	0.394759	-1.25182	-3.27417	1.31912	1.36363	2.72362	-1.45464	-1.46058	-1.55635	-2.66428	3.30185
172	1.70434	1.82313	-0.615466	0.432869	-1.19552	-3.31924	1.25179	1.35089	2.60303	-1.54161	-1.38849	-1.65291	-2.83351	3.27971
173	1.64677	1.72969	-0.600415	0.379646	-1.14732	-3.42184	1.16801	1.31615	2.44793	-1.64218	-1.27331	-1.76203	-3.02837	3.19598
174	1.46106	1.72833	-0.65035	0.418992	-1.14801	-3.57491	1.1677	1.27075	2.27224	-1.74989	-1.12572	-1.87316	-3.22774	3.06922
175	1.45714	1.5361	-0.734599	0.190572	-1.11791	-3.70761	1.19145	1.23161	2.09289	-1.85594	-0.966088	-1.97318	-3.40467	2.92687
176	1.52831	1.60627	-0.643045	0.228372	-1.16358	-3.71903	1.19371	1.21507	1.92638	-1.94964	-0.819717	-2.05243	-3.53386	2.79952
177	1.56782	1.50303	-0.602655	0.0779587	-1.14552	-3.75169	1.14604	1.23052	1.78533	-2.02028	-0.70996	-2.11009	-3.59941	2.7145
178	1.75336	1.48067	-0.674964	0.00555562	-1.0786	-3.67935	1.11719	1.27655	1.67577	-2.05994	-0.651213	-2.15611	-3.59955	2.69004
179	1.93969	1.56644	-0.741708	0.244857	-0.960268	-3.85449	1.04057	1.34107	1.59617	-2.06612	-0.644099	-2.20802	-3.5465	2.73132
180	1.93745	1.47312	-0.835676	0.294341	-0.885535	-3.70635	1.03974	1.40562	1.53798	-2.04285	-0.6745	-2.28352	-3.46166	2.82901
181	1.75085	1.51127	-0.918505	0.224085	-0.770435	-3.7258	1.08066	1.45229	1.48787	-1.99991	-0.716935	-2.39145	-3.36799	2.96094
182	1.60897	1.4234	-1.00285	0.227213	-0.714741	-3.62037	1.05457	1.47055	1.43094	-1.95033	-0.741397	-2.52533	-3.28292	3.09663
183	1.56877	1.21131	-0.849408	0.221839	-0.739437	-3.54445	0.883306	1.46077	1.35429	-1.90712	-0.721515	-2.66286	-3.21441	3.2041
184	1.52778	1.1137	-1.15249	0.156634	-0.665957	-3.67686	0.819736	1.43286	1.24988	-1.88046	-0.641438	-2.77254	-3.16105	3.25765
185	1.31323	1.18117	-1.24879	0.289743	-0.644855	-3.6008	0.667736	1.40022	1.11562	-1.87643	-0.499456	-2.82521	-3.11534	3.24479
186	1.16036	1.03123	-1.21793	0.29451	-0.705679	-3.2798	0.489811	1.37168	0.954371	-1.89737	-0.307471	-2.80527	-3.06811	3.1699
187	1.06843	0.857498	-1.37378	0.473378	-0.69248	-3.31717	0.301547	1.34475	0.771039	-1.94317	-0.0865651	-2.71662	-3.012	3.05296
188	0.773463	0.555127	-1.3491	0.451074	-0.587131	-3.13843	0.138714	1.30334	0.568961	-2.01248	0.139791	-2.57989	-2.94256	2.92282
189	0.813528	0.45294	-1.40972	0.517497	-0.539963	-2.93668	-0.0290738	1.22123	0.347211	-2.10294	0.352541	-2.42154	-2.85723	2.80674
190	0.670734	0.356847	-1.33774	0.509106	-0.450285	-2.78823	-0.0877979	1.07029	0.100621	-2.21014	0.541728	-2.25931	-2.75373	2.71953
191	0.578472	0.221779	-1.36472	0.535085	-0.352326	-2.63191	-0.248621	0.830174	-0.176386	-2.32593	0.707709	-2.09108	-2.6296	2.65615
192	0.448806	0.097138	-1.41221	0.539389	-0.202023	-2.50307	-0.321322	0.495708	-0.482962	-2.43737	0.858574	-1.89294	-2.48342	2.59114
193	0.311697	-0.0186679	-1.37492	0.77832	-0.0500603	-2.3567	-0.493197	0.078982	-0.804666	-2.52766	1.00478	-1.62865	-2.31728	2.48621
194	0.117386	-0.0659556	-1.34541	0.771912	-0.00980407	-2.10998	-0.599295	-0.394648	-1.10945	-2.57948	1.15312	-1.26714	-2.13881	2.30386
195	0.0145255	-0.108503	-1.425	0.773194	0.0463165	-1.9224	-0.591558	-0.894965	-1.34984	-2.57995	1.30213	-0.801008	-1.96106	2.02245
196	-0.229441	-0.202706	-1.31425	0.714911	0.109834	-1.74039	-0.402802	-1.39621	-1.47252	-2.52578	1.44055	-0.25748	-1.79931	1.64702
197	-0.128785	-0.106525	-1.35018	0.759295	0.191108	-1.69375	-0.414143	-1.88365	-1.43349	-2.42617	1.54939	0.303653	-1.66576	1.21147
198	-0.445413	-0.0955064	-1.42154	0.750495	0.223871	-1.52956	-0.464898	-2.3549	-1.21391	-2.30209	1.60702	0.805317	-1.56402	0.770867
199	-0.420482	-0.213633	-1.34933	0.870994	0.271818	-1.4559	-0.430163	-2.81594	-0.830703	-2.18156	1.59549	1.17616	-1.48592	0.386033
200	-0.6305	-0.204133	-1.36915	0.957635	0.323535	-1.20427	-0.392185	-3.27377	-0.337136	-2.09219	1.50592	1.37224	-1.41234	0.105814
201	-0.869093	-0.156751	-1.38084	0.958097	0.35261	-0.972274	-0.328503	-3.72904	0.188383	-2.05347	1.34147	1.38885	-1.31842	-0.0469166
202	-0.982138	-0.0761745	-1.47064	0.953192	0.352293	-0.812833	-0.296344	-4.17193	0.662268	-2.07156	1.11695	1.25834	-1.18128	-0.0807693
203	-1.15812	-0.033456	-1.48522	0.899613	0.422997	-0.590978	-0.27002	-4.58271	1.0182	-2.1385	0.855488	1.03565	-0.987681	-0.0313127
204	-1.23117	0.0727792	-1.52016	0.706996	0.432233	-0.514579	-0.311119	-4.93675	1.22436	-2.23577	0.583361	0.778196	-0.738732	0.0514869
205	-1.17879	0.0728962	-1.53957	0.695811	0.421535	-0.365955	-0.344667	-5.21187	1.28947	-2.34095	0.324614	0.52834	-0.450113	0.11918
206	-1.38759	0.160395	-1.54478	0.600545	0.369904	-0.252028	-0.340866	-5.39496	1.2558	-2.43484	0.0970217	0.305197	-0.147939	0.13868
207	-1.67706	0.200792	-1.65354	0.594036	0.547945	-0.297135	-0.320408	-5.48548	1.18236	-2.50619	-0.0898765	0.107246	0.138166	0.0997998
208	-1.96976	0.202133	-1.66598	0.575081	0.617286	-0.200598	-0.438341	-5.49472	1.12465	-2.55269	-0.23464	-0.0773703	0.382448	0.0147361
209	-2.17342	0.2494	-1.68175	0.546315	0.699112	-0.138457	-0.431298	-5.44141	1.11835	-2.57822	-0.342208	-0.25905	0.568657	-0.0894513
210	-2.09141	0.249271	-1.78247	0.290667	0.60643	-0.024999	-0.413769	-5.34551	1.17208	-2.58824	-0.421318	-0.43938	0.692645	-0.182137
211	-2.493	0.334228	-1.84642	0.217715	0.557957	0.0411544	-0.406026	-5.22239	1.27042	-2.58563	-0.481773	-0.611236	0.761712	-0.240223
212	-2.54592	0.432344	-2.03773	0.0919759	0.590206	0.165559	-0.398166	-5.07897	1.38447	-2.56913	-0.53215	-0.765102	0.79147	-0.25564
213	-2.42594	0.346117	-2.06363	-0.048476	0.369776	0.239264	-0.315429	-4.91283	1.48443	-2.5351	-0.578326	-0.897267	0.801411	-0.237309
214	-2.15309	0.564144	-2.0338	-0.0974661	0.394391	0.23068	-0.315519	-4.71398	1.54924	-2.48175	-0.622969	-1.01485	0.810379	-0.20745
215	-2.08897	0.699121	-2.05881	-0.211867	0.229127	0.316439	-0.236298	-4.46806	1.57042	-2.41329	-0.666006	-1.13459	0.832831	-0.193842
216	-1.88661	0.763378	-2.06833	-0.373565	0.149227	0.364812	-0.213074	-4.1601	1.55002	-2.34176	-0.705978	-1.27561	0.876419	-0.220774
217	-1.88904	0.764063	-2.35013	-0.636074	0.0354233	0.46916	-0.116883	-3.77792	1.49525	-2.28483	-0.741839	-1.44959	0.941208	-0.301549
218	-1.76075	0.955191	-2.16713	-0.699675	-0.0876996	0.510306	-0.0706492	-3.31484	1.41363	-2.25997	-0.774542	-1.65305	1.02063	-0.434669
219	-1.54537	0.932703	-2.19504	-0.603311	-0.195514	0.703265	-0.103906	-2.77159	1.31086	-2.27702	-0.807757	-1.86568	1.10384	-0.604621
220	-0.969529	0.814645	-2.2293	-0.814029	-0.400868	0.677306	-0.021732	-2.15731	1.19184	-2.3323	-0.847264	-2.05552	1.17895	-0.786788
221	-0.305979	0.75875	-2.38611	-0.91736	-0.506158	0.739638	0.206862	-1.48962	1.0636	-2.40691	-0.89898	-2.18905	1.23614	-0.954628
222	-0.0786283	0.904633	-2.24927	-1.01236	-0.604846	0.748668	0.308925	-0.79374	0.937838	-2.47059	-0.966286	-2.2422	1.26999	-1.08662
223	0.454027	0.880847	-2.05716	-0.898501	-0.657017	0.769849	0.456449	-0.100206	0.830734	-2.49018	-1.0477	-2.20791	1.28013	-1.17072
224	1.03863	1.06757	-2.08218	-0.914882	-0.801787	0.660425	0.716754	0.558551	0.759877	-2.43989	-1.13601	-2.09776	1.27008	-1.2051
225	1.07334	1.17517	-1.91203	-1.01303	-0.76223	0.719696	0.786824	1.15248	0.739486	-2.30964	-1.2196	-1.93713	1.24486	-1.19557
226	1.38986	1.12998	-1.7853	-1.00844	-0.815109	0.632315	0.971743	1.65828	0.775948	-2.10827	-1.28582	-1.75645	1.20832	-1.15099
227	1.50951	1.06169	-1.50004	-1.02694	-0.868563	0.436608	1.03763	2.06279	0.86545	-1.86052	-1.32515	-1.58167	1.16126	-1.07901
228	1.74406	1.09766	-1.41704	-1.04224	-0.877179	0.333178	1.12199	2.3646	0.994775	-1.59864	-1.33467	-1.42727	1.10119	-0.983836
229	2.14954	1.06745	-1.12973	-1.08015	-0.950892	0.311285	1.10454	2.5734	1.14495	-1.35201	-1.31939	-1.29379	1.02366	-0.866942
230	2.00387	1.13374	-1.07194	-1.1896	-0.799334	0.156341	1.24502	2.7071	1.29604	-1.13851	-1.29069	-1.17011	0.924537	-0.729866
231	1.9882	1.16504	-0.911258	-1.21428	-0.604176	-0.0242945	1.27714	2.78738	1.43148	-0.960576	-1.26261	-1.03901	0.80249	-0.57725
232	2.11992	1.27182	-0.668997	-1.28547	-0.453753	-0.131579	1.27957	2.83475	1.54062	-0.807029	-1.24743	-0.883987	0.660562	-0.418612
233	2.27778	1.31503	-0.651086	-1.32774	-0.211783	-0.342891	1.40795	2.86432	1.61921	-0.659521	-1.25242	-0.694926	0.506071	-0.267754
234	2.23372	1.33463	-0.289303	-1.26213	-0.0877671	-0.500665	1.47851	2.88326	1.66804	-0.501037	-1.2786	-0.471526	0.34873	-0.139493
235	2.16616	1.35193	-0.235551	-1.45652	0.0477577	-0.709562	1.50875	2.89047	1.69126	-0.322787	-1.32171	-0.22386	0.197982	-0.0448116
236	2.26845	1.23149	-0.215439	-1.43348	0.145214	-0.830416	1.41435	2.8783	1.69495	-0.127118	-1.37531	0.0297812	0.0603736	0.0132434
237	2.27411	1.30359	-0.134419	-1.35568	0.414324	-0.991901	1.30929	2.83607	1.68573	0.074051	-1.43444	0.266981	-0.0621952	0.0407931
238	2.3514	1.55176	0.00960521	-1.2828	0.610258	-1.0954	1.19477	2.75488	1.66927	0.264174	-1.4975	0.466138	-0.172523	0.0505251
239	2.27974	1.66714	0.082935	-1.41069	0.809263	-1.27845	1.07607	2.63236	1.64908	0.428255	-1.56546	0.611015	-0.276409	0.0559559
240	2.28605	1.53694	0.298447	-1.47022	0.897436	-1.25392	0.816683	2.47588	1.62546	0.557829	-1.63926	0.693914	-0.37996	0.0649273
241	2.19951	1.53389	0.586581	-1.51296	0.893626	-1.33563	0.673821	2.30327	1.59511	0.653139	-1.71649	0.716866	-0.486896	0.0753718
242	2.01803	1.43514	0.707477	-1.50725	0.847827	-1.38378	0.498107	2.14053	1.55223	0.722199	-1.7893	0.690733	-0.596854	0.0755602
243	1.91511	1.32139	0.88073	-1.61427	0.783394	-1.43063	0.356222	2.01655	1.49104	0.777323	-1.84513	0.632346	-0.70541	0.0492408
244	2.05918	1.23184	0.954161	-1.62521	0.613367	-1.48973	0.232365	1.95609	1.40863	0.830369	-1.87038	0.560216	-0.805803	-0.0161978
245	2.27729	1.24726	1.10756	-1.63535	0.538326	-1.48745	0.138572	1.97284	1.30704	0.888162	-1.8556	0.489876	-0.891681	-0.122289
246	2.17333	1.21698	1.19092	-1.75053	0.378805	-1.56071	0.0287475	2.06496	1.19315	0.949133	-1.7997	0.430206	-0.959859	-0.256819
247	2.46909	0.990215	1.32939	-1.82702	0.140516	-1.58768	-0.102388	2.21497	1.07612	1.0017	-1.71096	0.381675	-1.01217	-0.398042
248	2.79178	0.797585	1.16758	-1.72878	-0.121719	-1.62234	-0.37301	2.39444	0.963155	1.02493	-1.60365	0.336874	-1.05569	-0.524566
249	2.89638	0.835507	1.41954	-1.71023	-0.18702	-1.56993	-0.480395	2.57209	0.85574	0.991719	-1.49097	0.283305	-1.10091	-0.626519
250	3.17292	0.761545	1.2899	-1.84224	-0.344191	-1.62084	-0.641145	2.72293	0.748283	0.87433	-1.37726	0.207786	-1.15865	-0.712048
251	3.44446	0.628185	1.15361	-1.88937	-0.553133	-1.54468	-0.772592	2.83478	0.630466	0.65158	-1.2531	0.10113	-1.23684	-0.804652
252	3.9026	0.739434	0.734291	-1.61204	-0.58512	-1.48558	-0.906249	2.90987	0.492616	0.316272	-1.09624	-0.0382203	-1.33825	-0.930811
253	3.87391	0.556557	0.572355	-1.4871	-0.649439	-1.45689	-0.900954	2.96055	0.331503	-0.119149	-0.879095	-0.202393	-1.45956	-1.10229
254	3.89364	0.461229	0.112717	-1.1772	-0.756068	-1.41831	-0.908878	3.00109	0.153494	-0.620969	-0.580608	-0.37459	-1.59206	-1.30124
255	3.84889	0.265001	-0.0156097	-1.0175	-0.888543	-1.38084	-0.942703	3.03839	-0.0267895	-1.13807	-0.198074	-0.531916	-1.72371	-1.47653
256	3.91441	0.114435	-0.382027	-0.74386	-0.93458	-1.30447	-0.969218	3.0657	-0.192099	-1.61115	0.246053	-0.649822	-1.84166	-1.55586
257	3.97583	-0.0564304	-0.729176	-0.452599	-0.976472	-1.34168	-1.02176	3.0618	-0.329925	-1.98539	0.705678	-0.707094	-1.93458	-1.47101
258	3.98556	-0.151906	-1.008	-0.293291	-0.9126	-1.35637	-0.952321	2.99602	-0.437617	-2.22346	1.12128	-0.690424	-1.99443	-1.18735
259	4.06913	-0.263316	-1.58316	0.346198	-0.828052	-1.33194	-0.799856	2.83692	-0.522165	-2.31489	1.43586	-0.597674	-2.01764	-0.725139
260	3.6783	-0.252213	-1.83932	0.992128	-0.708427	-1.48767	-0.576178	2.56129	-0.594102	-2.27884	1.61088	-0.439149	-2.00537	-0.16214
261	3.38111	-0.346815	-1.98867	1.31747	-0.675412	-1.52176	-0.453757	2.16008	-0.657814	-2.15915	1.63673	-0.236648	-1.9632	0.3861
262	2.9363	-0.474298	-2.17166	2.09403	-0.665335	-1.68669	-0.109089	1.63965	-0.70307	-2.0132	1.53385	-0.0203862	-1.90012	0.802286
263	2.30399	-0.42897	-2.14753	2.6453	-0.585642	-1.80919	0.0474994	1.0187	-0.702866	-1.89759	1.34485	0.175767	-1.82688	1.00652
264	1.54677	-0.196765	-2.18686	3.01379	-0.409728	-2.0886	0.448449	0.323323	-0.619815	-1.85497	1.1203	0.31999	-1.7537	0.983306
265	0.654507	-0.0886975	-2.26034	3.30184	-0.387673	-1.95189	0.451158	-0.417117	-0.419348	-1.90531	0.90378	0.388212	-1.68757	0.785551
266	-0.0131073	0.354585	-2.30762	3.23206	-0.417826	-1.94806	0.67045	-1.17191	-0.0848463	-2.04372	0.721253	0.368759	-1.62991	0.513473
267	-0.762571	0.804053	-1.9585	2.94165	-0.295714	-1.83628	0.888589	-1.9088	0.371654	-2.24474	0.577939	0.26477	-1.57542	0.276855
268	-1.76802	1.3133	-1.86469	2.65289	-0.209564	-1.87956	1.04631	-2.59357	0.908338	-2.47105	0.462319	0.0935371	-1.51286	0.155552
269	-2.51685	1.91327	-1.82927	2.44406	-0.164185	-1.7673	1.11144	-3.19127	1.46313	-2.68396	0.354762	-0.117329	-1.42782	0.173508
270	-3.17375	2.67755	-1.89747	1.75364	-0.332411	-1.56429	0.949912	-3.67041	1.97047	-2.8526	0.236917	-0.336247	-1.30695	0.295464
271	-3.38544	3.26602	-1.97212	1.50609	-0.347084	-1.38193	0.845047	-4.00906	2.3791	-2.95988	0.0984379	-0.53522	-1.14245	0.446123
272	-3.62475	3.70192	-1.95931	1.32133	-0.433136	-1.03064	0.483863	-4.20027	2.6645	-3.00407	-0.0606617	-0.696646	-0.935298	0.542585
273	-3.65896	3.95286	-2.05379	1.16419	-0.504752	-0.746727	0.0984897	-4.25408	2.83172	-2.99646	-0.231536	-0.817293	-0.695891	0.526332
274	-3.58836	4.29217	-2.10557	0.80795	-0.66649	-0.6066	-0.0793269	-4.19433	2.90859	-2.956	-0.400133	-0.907926	-0.441754	0.382436
275	-3.54094	4.16855	-2.25699	0.630589	-0.734695	-0.487397	-0.452402	-4.05072	2.9331	-2.90278	-0.551034	-0.988423	-0.192867	0.140065
276	-3.42707	4.09105	-2.07575	0.635606	-0.7023	-0.266765	-0.802862	-3.84909	2.94045	-2.85199	-0.670213	-1.07962	0.0337457	-0.143667
277	-3.1082	4.20365	-2.11762	0.559851	-0.758909	-0.0620009	-1.16208	-3.60374	2.9543	-2.80973	-0.746464	-1.1944	0.228339	-0.408189
278	-2.76077	4.48841	-2.11445	0.511809	-0.870198	0.119464	-1.46452	-3.31489	2.98459	-2.77174	-0.772193	-1.33101	0.390114	-0.611757
279	-2.34735	4.29391	-2.20823	0.480399	-0.995338	0.265331	-1.80157	-2.97241	3.03102	-2.72515	-0.744426	-1.47141	0.525694	-0.743287
280	-1.91811	4.1441	-2.03689	0.280629	-1.11217	0.459125	-2.16086	-2.56393	3.08902	-2.6529	-0.666152	-1.58548	0.645067	-0.82091
281	-1.3907	3.92006	-1.91012	0.189756	-1.09767	0.604321	-2.41513	-2.08389	3.15478	-2.53938	-0.547392	-1.64036	0.756673	-0.880023
282	-1.00674	3.86628	-2.01347	0.0915832	-1.11016	0.676101	-2.60556	-1.53947	3.22699	-2.37584	-0.405104	-1.61154	0.863593	-0.957089
283	-0.285781	3.66941	-2.14321	0.116027	-1.10728	0.697736	-2.77682	-0.951156	3.30532	-2.16392	-0.261193	-1.49214	0.962376	-1.07584
284	0.52024	3.7164	-2.19452	0.0630618	-1.12414	0.896878	-2.95003	-0.347876	3.38707	-1.9162	-0.138564	-1.29691	1.04495	-1.24038
285	1.1905	3.46902	-2.19565	-0.0295117	-0.999716	0.970635	-3.13841	0.240874	3.46451	-1.65354	-0.0562824	-1.05911	1.10273	-1.43623
286	1.60072	3.39067	-2.03883	-0.19615	-0.93203	1.04228	-2.956	0.792369	3.52452	-1.39994	-0.02547	-0.821341	1.13118	-1.63716
287	2.11018	3.20551	-2.06811	-0.281102	-0.888799	1.07875	-2.90081	1.29459	3.55096	-1.17635	-0.0472976	-0.62311	1.13283	-1.81425
288	2.34557	2.92683	-2.1071	-0.33517	-0.809369	1.05542	-2.85633	1.74553	3.52901	-0.995264	-0.113743	-0.489533	1.11749	-1.94359
289	2.4946	2.73378	-1.95393	-0.323529	-0.692201	1.13505	-2.8932	2.14874	3.44988	-0.857666	-0.210809	-0.424841	1.09935	-2.01095
290	2.84412	2.59587	-1.84607	-0.23704	-0.605306	0.962487	-2.74002	2.50737	3.31398	-0.753133	-0.32285	-0.412568	1.09218	-2.0129
291	3.41284	2.49447	-1.8288	-0.234441	-0.514465	1.07885	-2.66574	2.81963	3.13161	-0.662938	-0.436338	-0.421922	1.10435	-1.95511
292	3.67781	2.50607	-1.69471	-0.280729	-0.465395	1.08771	-2.52905	3.07738	2.92133	-0.565052	-0.542054	-0.41789	1.1359	-1.84916
293	3.8544	2.30023	-1.32657	-0.276696	-0.177609	1.00988	-2.34077	3.26834	2.70638	-0.439487	-0.635588	-0.371508	1.17846	-1.70925
294	3.86053	2.32002	-1.14183	-0.226245	0.0945436	0.970079	-2.02675	3.38035	2.51005	-0.272447	-0.716275	-0.267162	1.21803	-1.54957
295	3.80468	2.28589	-1.04576	-0.249534	0.184373	0.907409	-1.65343	3.40614	2.35131	-0.0582053	-0.785266	-0.105217	1.23917	-1.3824
296	3.75129	2.18239	-0.749406	-0.226241	0.33311	0.828929	-1.29071	3.3464	2.24179	0.20124	-0.844132	0.100001	1.22928	-1.21714
297	3.62085	2.37078	-0.494195	-0.247295	0.417191	0.684347	-0.837034	3.21008	2.18409	0.497898	-0.894763	0.325331	1.18092	-1.06005
298	3.59646	2.28467	-0.134781	-0.309943	0.588693	0.6664	-0.552686	3.01222	2.17165	0.819894	-0.939965	0.545066	1.09203	-0.914539
299	3.42986	2.23272	0.0852933	-0.489736	0.625936	0.641923	-0.179372	2.77079	2.1903	1.15316	-0.983782	0.736397	0.964359	-0.781704
300	3.23352	2.28317	0.387942	-0.519753	0.622249	0.654851	-0.00549092	2.504	2.2208	1.48226	-1.03121	0.882774	0.801509	-0.661154
301	3.00945	2.19991	0.760323	-0.612348	0.745643	0.414535	0.223973	2.22905	2.24202	1.79047	-1.08712	0.975109	0.607644	-0.551985
302	2.66857	2.22894	1.00313	-0.753322	0.657535	0.270185	0.410326	1.96262	2.23438	2.06024	-1.15441	1.01159	0.387707	-0.45378
303	2.58295	2.23273	1.05562	-0.701767	0.680844	0.115751	0.644221	1.72203	2.1832	2.27449	-1.23216	0.996693	0.148687	-0.367523
304	2.36765	2.28744	1.53232	-0.720825	0.755153	-0.112924	0.923524	1.52571	2.08135	2.41912	-1.31482	0.939698	-0.0992093	-0.296037
305	1.93831	2.28013	1.99511	-0.848889	0.66639	-0.274871	0.910092	1.39163	1.93058	2.48628	-1.393	0.852966	-0.342746	-0.243532
306	1.58117	2.4318	2.34031	-0.955289	0.530563	-0.474878	0.892545	1.33351	1.74156	2.477	-1.45609	0.749841	-0.567807	-0.214273
307	1.684	2.28884	2.40419	-1.0331	0.376165	-0.638448	0.919627	1.35589	1.53157	2.40182	-1.49564	0.642155	-0.763028	-0.210741
308	1.7055	2.22105	2.51608	-1.10101	0.231635	-0.64902	0.841766	1.4503	1.32006	2.27834	-1.50803	0.537748	-0.923426	-0.232055
309	1.91569	2.18852	2.50477	-1.08835	0.204695	-0.723575	0.703877	1.59499	1.12269	2.1258	-1.49502	0.438892	-1.05211	-0.27379
310	1.89465	2.29442	2.80464	-1.17448	0.0861881	-0.760453	0.635612	1.75915	0.945846	1.95824	-1.46145	0.34246	-1.15876	-0.329792
311	2.34053	1.88672	2.56127	-1.11463	-0.223413	-0.711671	0.431138	1.91088	0.783604	1.77861	-1.41066	0.242265	-1.2552	-0.395283
312	2.51653	1.79242	2.46611	-1.18193	-0.265351	-0.765246	0.306059	2.02573	0.618946	1.57651	-1.33942	0.133175	-1.34951	-0.469732
313	2.53293	1.66134	2.40222	-1.00266	-0.31035	-0.902392	0.171152	2.09249	0.429987	1.33118	-1.2349	0.0156709	-1.44117	-0.5577
314	2.90904	1.44934	1.9579	-0.348211	-0.492574	-0.76577	-0.303023	2.11357	0.199737	1.01958	-1.07568	-0.101078	-1.51921	-0.666171
315	2.85444	1.22558	1.67423	0.0815258	-0.660336	-0.835853	-0.425741	2.09945	-0.0739262	0.627588	-0.837478	-0.199442	-1.56465	-0.798502
316	2.80477	1.11209	1.47853	0.572148	-0.608585	-0.954437	-0.566864	2.05964	-0.372161	0.160847	-0.501752	-0.257679	-1.55681	-0.947117
317	2.7552	1.10088	1.27281	1.00798	-0.609751	-0.910712	-0.644202	1.9946	-0.656319	-0.348891	-0.064445	-0.257399	-1.48084	-1.0883
318	2.7848	1.05391	1.06875	1.45283	-0.652775	-0.912596	-0.652065	1.89284	-0.877172	-0.844848	0.458741	-0.19156	-1.33378	-1.18255
319	2.59039	0.835018	0.600056	2.18664	-0.672121	-0.869771	-0.639904	1.73507	-0.989837	-1.25423	1.03319	-0.0699044	-1.12683	-1.18223
320	2.38151	0.808218	0.466238	2.68078	-0.659694	-0.841638	-0.530367	1.50379	-0.969554	-1.50333	1.61252	0.0807457	-0.883168	-1.04539
321	1.98811	0.780192	0.492364	3.07419	-0.596749	-0.954827	-0.427649	1.19377	-0.822283	-1.53509	2.1496	0.222409	-0.632019	-0.751268
322	1.64152	0.688901	0.439834	3.41177	-0.550926	-1.01657	-0.112987	0.818156	-0.585462	-1.32421	2.60735	0.316629	-0.40096	-0.311977
323	1.27395	0.754478	0.512742	3.48481	-0.512355	-0.960892	-0.0275488	0.406247	-0.31796	-0.885629	2.9655	0.336284	-0.209446	0.224497
324	1.11918	0.659879	0.52488	3.49046	-0.409014	-1.05581	0.125914	-0.00651086	-0.0821039	-0.273614	3.22093	0.274234	-0.0654722	0.782299
325	0.706295	0.601761	0.514141	3.56796	-0.415083	-0.929462	0.12565	-0.392169	0.0764565	0.428215	3.3819	0.145437	0.0339225	1.27486
326	0.210544	0.922105	0.70175	3.32566	-0.288218	-0.795432	0.311348	-0.741237	0.143948	1.12352	3.45945	-0.0184459	0.0989596	1.62591
327	-0.373427	1.05905	1.01303	3.3458	-0.272856	-0.746777	0.355993	-1.06567	0.143144	1.72215	3.46023	-0.179977	0.141883	1.78772
328	-0.91613	1.15132	1.2675	3.07668	-0.232665	-0.652847	0.522181	-1.39201	0.125953	2.15673	3.38381	-0.308295	0.172258	1.75082
329	-1.41916	1.29432	1.55602	2.99621	-0.115044	-0.663728	0.529776	-1.74749	0.156659	2.39291	3.22569	-0.388241	0.194506	1.54283
330	-1.71286	1.56576	1.76903	2.6367	-0.0819424	-0.679468	0.537991	-2.14533	0.291554	2.43143	2.98414	-0.422957	0.208286	1.21779
331	-2.04965	1.86406	1.93727	2.37163	-0.0691554	-0.61984	0.432693	-2.57591	0.561788	2.30213	2.66716	-0.429443	0.211195	0.840374
332	-2.53334	2.14294	2.12713	2.15248	-0.00154363	-0.403771	0.383476	-3.00775	0.964778	2.05221	2.29577	-0.429592	0.202584	0.470359
333	-2.81723	2.62035	2.24886	1.88763	0.109653	-0.258577	0.337608	-3.39759	1.46617	1.73258	1.90148	-0.440889	0.186928	0.151609
334	-3.06684	2.97011	2.23492	1.68442	0.0957379	-0.0629223	0.129161	-3.70481	2.01065	1.38619	1.51887	-0.470562	0.175234	-0.0926055
335	-3.17524	3.22481	2.18151	1.44998	0.0325658	0.0834663	-0.0603928	-3.90357	2.53718	1.04114	1.17641	-0.515159	0.183633	-0.258628
336	-3.18912	3.27581	2.07105	1.18068	-0.00572056	0.28996	-0.25349	-3.9876	2.99347	0.710054	0.88949	-0.564915	0.229434	-0.358093
337	-3.18718	3.56675	2.04307	1.11188	-0.100733	0.375836	-0.322184	-3.96638	3.34551	0.394796	0.658619	-0.610154	0.32578	-0.412704
338	-3.13679	3.61167	1.74466	0.995825	-0.0670783	0.454104	-0.434772	-3.85576	3.58048	0.0939603	0.473451	-0.646233	0.476563	-0.449525
339	-2.77812	3.75987	1.60163	0.966032	-0.0582579	0.652665	-0.618294	-3.66808	3.70363	-0.190006	0.320514	-0.674685	0.673452	-0.496924
340	-2.74752	3.56309	1.40171	0.913948	0.0253622	0.807582	-0.720582	-3.40716	3.7319	-0.447069	0.190915	-0.700392	0.896491	-0.580649
341	-2.79797	3.70563	1.03667	0.650851	-0.047571	0.972617	-0.802454	-3.06988	3.68704	-0.660702	0.0845132	-0.726698	1.11852	-0.719621
342	-2.42784	3.40987	0.568594	0.530791	-0.135238	1.07922	-0.92845	-2.65309	3.59069	-0.813217	0.00885586	-0.751269	1.31227	-0.92174
343	-2.01013	3.28706	0.226714	0.464125	-0.215499	1.24092	-0.997347	-2.1613	3.46206	-0.892919	-0.0263645	-0.765026	1.45796	-1.18075
344	-1.47908	3.10291	0.0276335	0.326891	-0.159559	1.35421	-1.03246	-1.61115	3.31774	-0.899895	-0.0165179	-0.754874	1.54904	-1.47557
345	-1.15424	2.76132	-0.305215	0.249974	-0.149999	1.37135	-1.06047	-1.02994	3.17219	-0.847767	0.0326304	-0.708964	1.59357	-1.77299
346	-0.766264	2.56891	-0.616259	0.179341	-0.0851065	1.33313	-1.0625	-0.449388	3.03779	-0.760278	0.104056	-0.621896	1.61086	-2.03365
347	-0.239909	2.60745	-0.819431	0.0599123	-0.10406	1.38756	-0.919951	0.10227	2.92388	-0.663708	0.1736	-0.497303	1.62408	-2.21987
348	-0.0295423	2.32913	-1.06577	-0.080438	-0.025619	1.45928	-0.898905	0.605886	2.83515	-0.577991	0.217385	-0.346684	1.65176	-2.30334
349	0.466031	2.30698	-1.18951	-0.099499	0.0454027	1.46838	-0.90535	1.05223	2.7705	-0.509955	0.219502	-0.185082	1.7008	-2.27056
350	0.756314	2.14561	-1.32999	-0.204009	0.136094	1.35503	-0.895641	1.43828	2.72333	-0.451236	0.177015	-0.0256459	1.76366	-2.12504
351	1.05684	2.05384	-1.35205	-0.192603	0.332252	1.24661	-0.865341	1.76149	2.68359	-0.381678	0.100486	0.124575	1.82066	-1.8858
352	0.974908	1.97975	-1.1785	-0.29891	0.506621	1.17345	-0.840555	2.0156	2.64111	-0.276936	0.00992378	0.265883	1.84649	-1.58304
353	1.13404	1.95938	-1.23972	-0.398249	0.585124	1.22155	-0.769118	2.19049	2.58913	-0.11725	-0.072278	0.403871	1.8185	-1.25203
354	1.57855	2.04483	-1.39141	-0.405743	0.743633	1.20688	-0.715986	2.27611	2.52651	0.106104	-0.128809	0.545269	1.72395	-0.927118
355	1.64775	1.90079	-1.0651	-0.370485	1.02732	1.11591	-0.659599	2.26835	2.45786	0.388855	-0.15296	0.693806	1.56395	-0.636675
356	1.59086	1.92212	-0.919175	-0.442451	1.06523	1.01597	-0.537475	2.1739	2.39123	0.716342	-0.150753	0.847703	1.35282	-0.399454
357	1.26926	1.77724	-0.377588	-0.587843	1.05405	0.811778	-0.413846	2.01162	2.33446	1.06898	-0.139216	0.99941	1.1134	-0.223015
358	1.4412	1.75802	0.220982	-0.619389	1.17517	0.604254	-0.306527	1.80904	2.29165	1.42801	-0.14144	1.13736	0.870093	-0.104175
359	1.56388	1.89414	0.351246	-0.784577	1.1214	0.583925	-0.279609	1.59542	2.26104	1.77924	-0.179852	1.24884	0.641968	-0.0312425
360	1.47125	1.78912	0.906012	-0.852315	1.2361	0.405442	-0.185167	1.39448	2.23523	2.11344	-0.269551	1.32276	0.438078	0.0121758
361	1.17282	1.66345	1.50536	-0.920922	1.1942	0.233636	-0.111026	1.21975	2.20335	2.42393	-0.413694	1.35162	0.256272	0.0424578
362	1.33832	1.82691	2.08626	-1.00815	1.22336	0.158313	-0.0864676	1.07423	2.15462	2.70338	-0.602163	1.33246	0.085807	0.0716402
363	1.14589	1.76781	2.52983	-1.04348	1.08173	0.133539	0.0518523	0.953943	2.08177	2.94187	-0.813803	1.26695	-0.0871784	0.104617
364	0.99028	1.68459	2.69438	-1.19624	0.938102	0.0262705	0.213583	0.85383	1.98309	3.12778	-1.02174	1.16079	-0.273203	0.138477
365	0.965872	1.73695	3.10045	-1.38949	0.791422	-0.102259	0.238797	0.773396	1.86222	3.25088	-1.20035	1.02284	-0.474236	0.164243
366	0.776474	1.65483	3.39957	-1.52448	0.744836	-0.31745	0.237978	0.719448	1.72623	3.30612	-1.33188	0.863946	-0.681623	0.170502
367	0.814685	1.55229	3.81839	-1.71201	0.794011	-0.427972	0.16773	0.704676	1.58264	3.29605	-1.4104	0.695295	-0.878102	0.1477
368	0.950027	1.5451	3.99944	-1.81104	0.760727	-0.605197	0.0749949	0.742665	1.43682	3.23047	-1.44191	0.526757	-1.04338	0.0918162
369	0.954921	1.53965	4.12002	-1.99752	0.631369	-0.594493	0.021777	0.841321	1.29065	3.12324	-1.44047	0.365608	-1.16143	0.00613828
370	0.891433	1.39985	4.13117	-2.02973	0.413596	-0.611431	-0.136125	0.997416	1.1431	2.98731	-1.42171	0.216086	-1.22695	-0.0997425
371	0.931673	1.47969	4.10142	-2.00952	0.395017	-0.629058	-0.330085	1.19459	0.991977	2.83055	-1.39615	0.0798589	-1.24843	-0.213363
372	1.16173	1.33921	4.18307	-1.99318	0.360485	-0.69933	-0.426553	1.40585	0.835859	2.65399	-1.36474	-0.0426908	-1.24631	-0.323817
373	1.37048	1.2378	4.31232	-1.90436	0.265579	-0.741173	-0.5994	1.59987	0.675416	2.45315	-1.31812	-0.1509	-1.24665	-0.425467
374	1.48611	1.21641	4.16162	-1.68268	0.260062	-0.73482	-0.689777	1.74906	0.513467	2.22104	-1.2399	-0.242735	-1.2724	-0.519257
375	1.74773	1.19383	4.0139	-1.60885	0.172936	-0.590537	-0.72191	1.83631	0.353659	1.95172	-1.11254	-0.314623	-1.33556	-0.610741
376	1.76779	1.06746	3.81581	-1.49032	0.123347	-0.500153	-0.64753	1.85789	0.198413	1.64245	-0.923507	-0.362273	-1.43283	-0.705486
377	1.8323	0.991878	3.44326	-1.15951	0.0571652	-0.496616	-0.708644	1.8213	0.0471769	1.29395	-0.669149	-0.382102	-1.54678	-0.803775
378	1.92104	1.09032	3.04218	-0.973254	0.0793433	-0.415855	-0.70201	1.73932	-0.103951	0.909113	-0.355318	-0.372506	-1.65166	-0.897057
379	1.85696	0.917568	2.77179	-0.6359	-0.00213094	-0.304022	-0.712223	1.62245	-0.260616	0.492285	0.00531574	-0.334452	-1.72182	-0.968234
380	1.79376	0.749658	2.39439	-0.442005	-0.0227385	-0.112742	-0.637409	1.47332	-0.427005	0.0503291	0.397644	-0.271313	-1.73973	-0.996357
381	1.79739	0.636503	2.01564	-0.0809644	-0.114086	0.0260865	-0.605765	1.28537	-0.602254	-0.404264	0.808061	-0.188098	-1.7007	-0.96434
382	1.81757	0.444248	1.60266	0.298955	-0.178262	0.0648111	-0.56609	1.04692	-0.777911	-0.849515	1.22627	-0.0904794	-1.61286	-0.866732
383	1.63848	0.214065	1.1316	0.637408	-0.220681	0.157967	-0.573521	0.748993	-0.937734	-1.25163	1.64446	0.0159158	-1.49292	-0.714124
384	1.54084	-0.0252119	0.523138	1.09389	-0.297223	0.31161	-0.390443	0.393522	-1.06052	-1.56664	2.05462	0.125796	-1.35987	-0.531821
385	1.21555	-0.131818	0.329515	1.52855	-0.310465	0.427724	-0.340711	-0.00180267	-1.12544	-1.74704	2.44587	0.234266	-1.2289	-0.352633
386	0.964094	-0.255691	0.186615	2.02355	-0.287952	0.460026	-0.248943	-0.404368	-1.11815	-1.75228	2.80348	0.336842	-1.10789	-0.206125
387	0.752823	-0.165488	0.309135	2.33376	-0.244402	0.490269	-0.100771	-0.773487	-1.03582	-1.5599	3.11079	0.429507	-0.996709	-0.108288
388	0.36201	-0.174948	0.494581	2.62545	-0.213366	0.437424	0.184111	-1.07094	-0.889334	-1.17326	3.35315	0.508756	-0.889444	-0.055725
389	0.0844497	-0.341882	0.744068	3.08852	-0.164759	0.472917	0.168558	-1.27138	-0.701522	-0.622775	3.52254	0.571398	-0.777789	-0.0267996
390	-0.126381	-0.327181	1.16	3.42195	-0.177828	0.519213	0.203395	-1.36881	-0.501814	0.0405051	3.6207	0.613972	-0.654342	0.0106069
391	-0.0281619	-0.418109	1.57413	3.44666	-0.132032	0.549004	0.270828	-1.37699	-0.318973	0.756747	3.65947	0.632071	-0.514656	0.0876693
392	-0.130809	-0.353802	2.22108	3.90949	0.00919484	0.628575	0.336865	-1.32381	-0.174156	1.47079	3.65769	0.620159	-0.357872	0.223731
393	-0.293805	-0.327761	2.79635	3.77685	0.0432489	0.669391	0.428238	-1.24218	-0.0765478	2.14258	3.63596	0.572451	-0.186219	0.419825
394	-0.10854	-0.347183	3.13132	3.73562	-0.0528548	0.794742	0.375792	-1.16094	-0.0229413	2.75126	3.6109	0.485111	-0.00397744	0.658686
395	-0.257084	-0.382113	3.70838	3.80816	0.0733006	0.892818	0.389951	-1.09889	-0.00117415	3.29237	3.59116	0.359312	0.183468	0.910846
396	-0.213889	-0.591133	4.26024	3.74571	0.124985	1.00804	0.646052	-1.06344	0.00389895	3.76999	3.57626	0.203953	0.370253	1.14418
397	-0.518228	-0.489506	4.45574	3.51831	0.030549	1.04724	0.632732	-1.05343	0.00406787	4.18782	3.5584	0.0365361	0.550499	1.33326
398	-0.552957	-0.560172	4.74019	3.31622	-0.0149049	1.10985	0.613951	-1.06407	0.00341202	4.54282	3.52645	-0.118791	0.718788	1.46547
399	-0.641268	-0.442483	4.71913	3.20767	-0.0533093	1.1588	0.773033	-1.09161	-0.00260304	4.82415	3.47017	-0.235981	0.870644	1.54238
400	-0.83645	-0.467012	4.77524	3.22426	-0.166313	1.21995	0.726384	-1.13561	-0.0245139	5.01713	3.38326	-0.293319	1.00297	1.57681
401	-0.652671	-0.338803	4.72032	3.00401	-0.0311443	1.22014	0.677133	-1.19851	-0.0739327	5.11009	3.26455	-0.279159	1.11414	1.58713
402	-0.992845	-0.403002	4.43145	3.14408	-0.00846091	1.34306	0.660767	-1.28348	-0.158399	5.10066	3.11732	-0.195314	1.20354	1.59117
403	-1.10936	-0.387109	4.29382	3.0287	-0.0878055	1.35478	0.642092	-1.39192	-0.278175	4.99852	2.94778	-0.0569398	1.27064	1.60143
404	-1.14237	-0.413375	4.15818	2.89635	-0.131435	1.25054	0.665225	-1.52226	-0.426236	4.82385	2.76352	0.110965	1.31403	1.62256
405	-1.19616	-0.394676	3.8425	2.86805	-0.183209	1.20259	0.578731	-1.67041	-0.591247	4.60186	2.57251	0.279054	1.33095	1.65121
406	-1.30377	-0.327298	3.53028	2.77074	-0.203161	1.14186	0.543459	-1.83161	-0.761997	4.35611	2.38285	0.419381	1.31767	1.67789
407	-1.1583	-0.321728	3.31946	2.49543	-0.317845	1.16038	0.564474	-2.00244	-0.931154	4.10334	2.20286	0.509985	1.27077	1.69001
408	-1.37805	-0.320962	2.99231	2.20194	-0.299806	1.03248	0.681126	-2.1818	-1.09661	3.85178	2.04089	0.53764	1.18895	1.67575
409	-1.70966	-0.200288	2.91386	2.26629	-0.397763	1.02782	0.692737	-2.37	-1.25968	3.60311	1.90441	0.49889	1.07473	1.62759
410	-1.86159	-0.179136	2.69852	2.29434	-0.339791	1.03957	0.700342	-2.5666	-1.42104	3.35666	1.79858	0.399971	0.934995	1.54501
411	-2.07163	-0.197771	2.39732	1.99759	-0.354371	0.935171	0.747683	-2.76797	-1.57647	3.1135	1.72463	0.25594	0.780057	1.43533
412	-2.09351	-0.167062	2.23329	1.84213	-0.386981	0.718801	0.736011	-2.96584	-1.71477	2.87862	1.67866	0.089005	0.621374	1.31224
413	-2.29775	-0.284961	2.09682	1.81696	-0.277836	0.702422	0.623099	-3.14779	-1.81893	2.66011	1.65158	-0.0742231	0.468763	1.19225
414	-2.28735	-0.246524	2.00243	1.61185	-0.187634	0.582158	0.550002	-3.29965	-1.87065	2.46623	1.63045	-0.206889	0.328154	1.08979
415	-2.5022	-0.257823	1.66327	1.46293	-0.0788317	0.489486	0.524853	-3.40912	-1.85641	2.30191	1.60099	-0.287196	0.200738	1.01252
416	-2.65864	-0.277005	1.64394	1.31141	-0.0981744	0.258036	0.386736	-3.46924	-1.77244	2.16643	1.55075	-0.303555	0.0838877	0.958793
417	-2.6932	-0.27196	1.40022	1.22341	-0.0229259	0.0149112	0.302911	-3.48037	-1.62664	2.05334	1.47203	-0.257773	-0.0265564	0.917847
418	-2.7767	-0.206623	1.22928	1.19218	0.0359496	-0.093368	0.125352	-3.44987	-1.43683	1.95246	1.36376	-0.164858	-0.133712	0.87305
419	-2.9488	-0.224129	0.93253	1.07748	0.125135	-0.277046	0.0926624	-3.39005	-1.22589	1.85284	1.2318	-0.0489789	-0.238008	0.806973
420	-3.14125	-0.236016	0.865787	1.01501	0.191544	-0.332984	-0.0214251	-3.31514	-1.0159	1.74542	1.08745	0.0635219	-0.337161	0.706776
421	-3.24714	-0.218148	0.813764	0.942125	0.299859	-0.363312	-0.139818	-3.2383	-0.823631	1.62404	0.944423	0.151803	-0.427768	0.568061
422	-3.41765	-0.141723	0.674828	0.793047	0.366353	-0.556264	-0.245268	-3.16924	-0.65874	1.48498	0.814936	0.20618	-0.507843	0.396052
423	-3.51606	-0.133772	0.689181	0.745809	0.573309	-0.591016	-0.312663	-3.11311	-0.524621	1.32581	0.706622	0.229762	-0.578961	0.203926
424	-3.53032	-0.154323	0.599256	0.641425	0.525844	-0.685141	-0.420576	-3.07069	-0.420878	1.14488	0.621322	0.235748	-0.64678	0.00897042
425	-3.75176	0.0524603	0.5964	0.518038	0.482972	-0.727893	-0.3929	-3.03896	-0.345887	0.942085	0.556133	0.241796	-0.719636	-0.172089
426	-3.83793	0.132174	0.50814	0.402165	0.580816	-0.849053	-0.469819	-3.01212	-0.298119	0.720541	0.506305	0.263683	-0.80579	-0.327029
427	-3.76747	0.158092	0.409351	0.402556	0.534906	-0.771936	-0.506434	-2.98305	-0.275966	0.488547	0.468948	0.310452	-0.910411	-0.450303
428	-3.69806	0.160687	0.239076	0.423111	0.550009	-0.791968	-0.61424	-2.94534	-0.276868	0.260622	0.445942	0.382484	-1.03351	-0.543176
429	-3.53323	0.0996651	0.071566	0.396376	0.590836	-0.785917	-0.665152	-2.89594	-0.29682	0.0566869	0.444447	0.472543	-1.16961	-0.612004
430	-3.14369	0.121673	-0.226792	0.31842	0.739297	-0.818677	-0.673651	-2.83783	-0.330864	-0.100821	0.474147	0.568645	-1.30936	-0.665247
431	-3.13135	0.126466	-0.341385	0.241314	0.820155	-0.870919	-0.578499	-2.78164	-0.374558	-0.19092	0.541852	0.657191	-1.44218	-0.710161
432	-2.95362	0.21185	-0.381857	0.184099	0.943819	-0.92175	-0.518044	-2.74508	-0.425741	-0.197818	0.645512	0.72527	-1.55885	-0.750264
433	-2.89577	0.153217	-0.496174	0.0863932	0.90637	-0.920301	-0.437686	-2.7496	-0.485391	-0.113526	0.770291	0.761892	-1.65302	-0.784357
434	-2.93641	0.178064	-0.626292	0.0134312	0.914629	-0.969297	-0.362821	-2.8144	-0.556611	0.0609707	0.888816	0.758531	-1.72151	-0.807293
435	-2.93657	0.256938	-0.643093	-0.009121	0.982392	-1.10093	-0.255298	-2.9493	-0.641994	0.315939	0.966305	0.709594	-1.76388	-0.812288
436	-2.73569	0.171	-0.546703	-0.123192	0.825746	-1.07501	-0.316082	-3.14888	-0.740726	0.634042	0.969389	0.613075	-1.7818	-0.794154
437	-2.52675	0.182574	-0.462381	-0.144923	0.691093	-1.06769	-0.370138	-3.39018	-0.846915	0.99183	0.875704	0.471249	-1.77879	-0.752374
438	-2.38154	0.234854	-0.355147	-0.214701	0.649282	-1.11593	-0.433059	-3.63521	-0.95023	1.36155	0.680798	0.290874	-1.7604	-0.692764
439	-2.01608	0.250226	0.104231	-0.356996	0.480584	-1.05469	-0.445859	-3.83811	-1.03902	1.71368	0.399796	0.0823291	-1.7343	-0.626929
440	-1.86515	0.253034	0.340059	-0.579421	0.403618	-1.05908	-0.450892	-3.95524	-1.10496	2.02052	0.0631786	-0.142433	-1.70952	-0.569503
441	-1.6369	0.179881	0.841838	-0.688628	0.277254	-1.10278	-0.451335	-3.95517	-1.14745	2.26016	-0.291811	-0.372436	-1.69453	-0.534022
442	-1.37022	0.0365868	1.4107	-0.758254	0.00566609	-1.22488	-0.365733	-3.82578	-1.17574	2.42012	-0.63105	-0.599751	-1.69455	-0.52884
443	-1.13951	0.0586203	2.02684	-0.831677	-0.213411	-1.20727	-0.454315	-3.57634	-1.20752	2.49928	-0.931341	-0.82022	-1.70919	-0.554522
444	-0.696232	0.0287911	2.31926	-0.914073	-0.50261	-1.20665	-0.555014	-3.23443	-1.26416	2.50706	-1.18386	-1.03255	-1.73176	-0.60368
445	-0.328539	-0.0236338	2.6283	-1.10403	-0.807503	-1.13571	-0.649526	-2.83876	-1.364	2.45971	-1.39267	-1.23613	-1.75087	-0.663291
446	-0.0409818	-0.0967834	2.88202	-1.17917	-1.10802	-1.10441	-0.755565	-2.42997	-1.51572	2.3748	-1.56964	-1.42853	-1.75426	-0.718543
447	0.294757	-0.150922	2.97652	-1.33611	-1.30839	-1.10328	-0.794831	-2.04205	-1.71403	2.26581	-1.72806	-1.6037	-1.73325	-0.756891
448	0.709393	-0.173472	2.94787	-1.52757	-1.61597	-1.10429	-0.858542	-1.6968	-1.93937	2.1389	-1.87743	-1.75166	-1.68582	-0.771179
449	0.95035	-0.235499	2.88384	-1.59915	-1.7851	-1.12856	-0.901419	-1.4023	-2.16215	1.99305	-2.0206	-1.85949	-1.6168	-0.761085
450	1.33661	-0.180152	2.67772	-1.72881	-1.89423	-1.11232	-0.904616	-1.1556	-2.34999	1.82338	-2.15338	-1.91332	-1.53485	-0.732789
451	1.58147	-0.309769	2.44133	-1.78222	-1.88479	-1.33292	-0.853054	-0.948134	-2.47628	1.62611	-2.2658	-1.90045	-1.44738	-0.697438
452	1.74566	-0.327969	2.11372	-1.68815	-1.88601	-1.22086	-0.983386	-0.772156	-2.5278	1.40294	-2.34399	-1.81159	-1.35581	-0.669164
453	1.78058	-0.307429	1.85552	-1.66286	-1.92663	-1.24974	-1.02262	-0.625982	-2.50926	1.1631	-2.37204	-1.64283	-1.25375	-0.662943
454	1.8381	-0.334394	1.66031	-1.69051	-1.90096	-1.17515	-0.913219	-0.516154	-2.44342	0.922192	-2.33373	-1.39755	-1.12914	-0.692306
455	1.82138	-0.3961	1.27269	-1.58171	-1.74	-1.17126	-0.925296	-0.455647	-2.36639	0.698203	-2.21461	-1.08771	-0.969784	-0.766901
456	1.58047	-0.499694	1.00774	-1.42981	-1.56378	-1.07209	-0.98354	-0.458589	-2.31935	0.506434	-2.00515	-0.734211	-0.769638	-0.889893
457	1.50384	-0.645637	0.715528	-1.20074	-1.48684	-0.912777	-1.06646	-0.533271	-2.33831	0.354983	-1.70405	-0.365714	-0.533217	-1.05568
458	1.23847	-0.707165	0.468619	-0.95737	-1.33515	-0.937832	-0.943336	-0.676146	-2.4442	0.242341	-1.32073	-0.0156171	-0.275689	-1.24899
459	0.960807	-0.844368	0.280768	-0.60294	-1.20646	-0.781412	-0.967065	-0.869408	-2.63602	0.157705	-0.876073	0.282618	-0.0184704	-1.44632
460	0.843339	-0.813568	-0.122301	-0.335317	-1.07746	-0.552832	-0.86068	-1.08367	-2.88923	0.0839084	-0.400414	0.500814	0.217938	-1.6199
461	0.597834	-1.03705	0.126729	0.0499611	-0.934713	-0.450966	-0.676806	-1.28535	-3.16033	0.00215205	0.0713845	0.620681	0.420824	-1.74361
462	0.480552	-0.958153	0.309664	0.172563	-0.69031	-0.374001	-0.430731	-1.44655	-3.39701	-0.102667	0.506698	0.636404	0.588915	-1.79905
463	0.28163	-1.11264	0.591128	0.374751	-0.585507	-0.278481	-0.310538	-1.5538	-3.55157	-0.237093	0.881575	0.554848	0.73142	-1.77982
464	0.04789	-1.15865	0.684978	0.586428	-0.464601	-0.10273	-0.195612	-1.61236	-3.59417	-0.395685	1.18475	0.393955	0.863132	-1.69257
465	0.0314625	-1.20097	0.902959	0.545206	-0.406694	-0.0689773	-0.0770995	-1.64395	-3.52196	-0.56008	1.41775	0.180322	0.99791	-1.55433
466	-0.306173	-1.3577	0.898922	0.698802	-0.493444	0.125497	-0.130858	-1.67816	-3.36078	-0.701185	1.59119	-0.05315	1.14338	-1.38696
467	-0.29275	-1.60193	1.20067	0.779935	-0.514259	0.253389	-0.100937	-1.74061	-3.15848	-0.78435	1.71864	-0.269414	1.29885	-1.21108
468	-0.431747	-1.6348	1.16385	0.889837	-0.526613	0.500774	-0.059025	-1.84215	-2.97146	-0.776802	1.81063	-0.430032	1.45678	-1.04145
469	-0.462613	-1.71282	1.32255	0.877566	-0.525105	0.535059	0.065731	-1.97314	-2.84848	-0.655839	1.87112	-0.499692	1.60631	-0.88527
470	-0.674958	-1.92942	1.04982	1.24308	-0.636594	0.789854	-0.0215741	-2.10498	-2.81694	-0.415552	1.89782	-0.452914	1.73676	-0.743472
471	-0.829564	-1.96828	1.19335	1.51879	-0.598564	1.02288	0.0582068	-2.19888	-2.87603	-0.0700355	1.88621	-0.281983	1.8396	-0.613764
472	-0.722567	-2.10957	1.25425	1.5976	-0.581786	1.04605	0.174	-2.21864	-2.99931	0.348009	1.83529	-0.00351775	1.90839	-0.493559
473	-0.829966	-2.14007	1.23032	1.57968	-0.668328	1.11459	0.187521	-2.14304	-3.14531	0.793201	1.75263	0.339753	1.93757	-0.381427
474	-0.855322	-2.34957	1.44001	1.59057	-0.699341	1.23004	0.208334	-1.97347	-3.27233	1.21642	1.65597	0.684509	1.92163	-0.276942
475	-0.832846	-2.21945	1.59369	1.60841	-0.672098	1.19424	0.203462	-1.73431	-3.35165	1.57429	1.57004	0.959691	1.85576	-0.179562
476	-0.973225	-2.18182	1.48657	1.86097	-0.683574	1.35722	0.151232	-1.46614	-3.3747	1.8367	1.51947	1.10381	1.73785	-0.0876536
477	-0.852414	-2.42028	1.60514	1.87265	-0.713617	1.24405	0.213909	-1.21417	-3.35194	1.9909	1.52022	1.08156	1.57076	0.00114124
478	-0.880106	-2.44827	1.46507	1.87829	-0.830788	1.25404	0.173024	-1.0159	-3.30489	2.0415	1.57286	0.894127	1.36345	0.0880053
479	-0.727814	-2.44001	1.57516	1.7432	-0.883021	1.09062	0.155553	-0.891729	-3.2549	2.00731	1.6606	0.578998	1.1298	0.170537
480	-0.594504	-2.29114	1.7112	1.59044	-0.866815	1.0031	0.321924	-0.841505	-3.21369	1.91601	1.75329	0.199094	0.885334	0.241316
481	-0.729994	-2.22685	1.91357	1.54189	-0.851364	0.964442	0.301055	-0.847605	-3.17962	1.79844	1.81638	-0.175279	0.643227	0.288536
482	-0.753999	-2.32549	1.90372	1.63666	-0.990763	0.879983	0.166492	-0.88279	-3.14023	1.68325	1.82156	-0.485459	0.411573	0.299008
483	-0.527554	-2.2171	1.84407	1.47544	-1.07907	0.611147	0.0839084	-0.919733	-3.07904	1.59291	1.75511	-0.698082	0.192913	0.262743
484	-0.501841	-2.18529	1.76899	1.39049	-1.14022	0.485264	-0.0139667	-0.938988	-2.98318	1.54092	1.62107	-0.809244	-0.0137933	0.177474
485	-0.343431	-2.03271	1.8761	1.34465	-1.21788	0.335201	0.0396012	-0.93296	-2.84824	1.53046	1.43818	-0.838942	-0.209873	0.0513048
486	-0.336426	-1.84416	1.73897	1.14828	-1.3079	0.178111	-0.130782	-0.905149	-2.67844	1.55449	1.23203	-0.819222	-0.394184	-0.0976253
487	-0.299623	-1.66241	1.73289	1.00196	-1.38133	0.0231425	-0.217973	-0.865763	-2.48275	1.59736	1.02572	-0.781295	-0.562306	-0.244428
488	-0.327946	-1.65809	1.53133	0.883177	-1.43748	-0.217082	-0.33338	-0.825969	-2.2696	1.63812	0.832858	-0.746373	-0.707898	-0.362887
489	-0.277768	-1.64598	1.39506	0.766035	-1.52289	-0.400458	-0.402238	-0.793285	-2.04327	1.65484	0.655415	-0.722636	-0.825347	-0.431639
490	-0.340686	-1.66864	1.06645	0.840063	-1.66469	-0.390399	-0.514978	-0.7698	-1.80379	1.62942	0.486656	-0.707794	-0.912141	-0.439337
491	-0.246557	-1.67691	0.93589	0.817528	-1.6774	-0.457863	-0.585783	-0.75339	-1.5501	1.55139	0.317183	-0.694523	-0.969707	-0.387262
492	-0.215264	-1.49529	0.919822	0.752277	-1.81758	-0.608734	-0.607978	-0.740631	-1.2844	1.42007	0.141175	-0.675486	-1.00246	-0.288841
493	-0.134958	-1.4815	0.698534	0.620767	-1.77029	-0.692244	-0.502001	-0.72958	-1.01531	1.24422	-0.0398715	-0.645657	-1.0158	-0.166328
494	-0.00793584	-1.29536	0.453545	0.590112	-1.67398	-0.738397	-0.417732	-0.720921	-0.757789	1.03948	-0.21714	-0.601753	-1.01422	-0.0453506
495	-0.0763831	-1.20563	0.271801	0.448008	-1.56303	-0.810428	-0.40716	-0.716981	-0.529291	0.824342	-0.377662	-0.540325	-1.00071	0.0514604
496	-0.194112	-1.11116	0.00931166	0.305511	-1.48819	-0.873116	-0.381578	-0.719536	-0.34408	0.616368	-0.508616	-0.45668	-0.977713	0.110101
497	-0.126437	-1.02099	-0.151467	0.265228	-1.4175	-0.918303	-0.39918	-0.72821	-0.208198	0.429424	-0.600537	-0.345947	-0.948476	0.128441
498	-0.244429	-0.803029	-0.259158	0.203165	-1.37319	-0.955656	-0.353826	-0.740928	-0.117293	0.272893	-0.648321	-0.206041	-0.917715	0.116083
499	-0.553179	-0.695207	-0.205925	0.0874105	-1.39107	-1.01079	-0.346221	-0.756557	-0.0582605	0.15283	-0.650322	-0.041096	-0.890615	0.0907064
500	-0.485815	-0.521144	-0.128131	0.0193031	-1.3246	-1.01382	-0.279744	-0.778561	-0.0140288	0.0743786	-0.606987	0.136463	-0.870383	0.0718599
501	-0.576121	-0.532544	-0.0486339	-0.124332	-1.35991	-0.923277	-0.35215	-0.817409	0.0305659	0.0441579	-0.520653	0.306586	-0.855459	0.0739921
502	-0.635809	-0.313006	0.0216284	-0.101095	-1.3193	-0.859905	-0.428107	-0.889545	0.084107	0.0713158	-0.397214	0.445067	-0.838231	0.101047
503	-0.608671	-0.202631	0.269768	-0.160542	-1.35689	-0.827455	-0.408899	-1.01222	0.146667	0.166434	-0.248953	0.528557	-0.806658	0.144557
504	-0.619478	-0.0183387	0.40109	-0.203765	-1.26876	-0.831769	-0.443555	-1.19558	0.210846	0.338265	-0.0966517	0.539325	-0.74882	0.185989
505	-0.690934	-0.00470035	0.457785	-0.301956	-1.18933	-0.878092	-0.467847	-1.43491	0.264911	0.589271	0.0310502	0.468246	-0.658937	0.202649
506	-0.773812	-0.0194989	0.747794	-0.362015	-1.19193	-0.9524	-0.520727	-1.70677	0.296623	0.911576	0.102114	0.315428	-0.542488	0.175262
507	-0.939742	-0.0354081	1.08309	-0.523532	-1.1677	-0.972115	-0.581943	-1.9712	0.296445	1.28504	0.0885051	0.0889767	-0.418055	0.094617
508	-0.874802	-0.0639673	1.36455	-0.739942	-1.1002	-0.989451	-0.601313	-2.18064	0.259251	1.67877	-0.0258964	-0.197072	-0.314601	-0.0351114
509	-0.957907	-0.101257	1.81115	-0.877813	-1.18758	-0.920537	-0.706639	-2.2926	0.184447	2.0563	-0.239826	-0.524782	-0.264637	-0.197509
510	-1.00013	-0.167311	2.17957	-1.06224	-1.1972	-0.9125	-0.732298	-2.28208	0.0750532	2.38333	-0.533917	-0.874019	-0.295447	-0.368965
511	-1.10666	-0.286479	2.25518	-1.19239	-1.26747	-0.83203	-0.699449	-2.14883	-0.0636343	2.63552	-0.875412	-1.22402	-0.421296	-0.525886
512	-1.20603	-0.459423	2.48235	-1.27838	-1.2863	-0.818852	-0.743591	-1.91713	-0.225548	2.80372	-1.22684	-1.55533	-0.639154	-0.651695
513	-1.16264	-0.548602	2.55328	-1.38222	-1.36582	-0.744552	-0.729882	-1.62784	-0.405341	2.89472	-1.5554	-1.85231	-0.929067	-0.741235
514	-1.28984	-0.641511	2.77881	-1.38025	-1.34338	-0.762337	-0.768575	-1.32569	-0.599425	2.92698	-1.8396	-2.1057	-1.25872	-0.801144
515	-1.19447	-0.705869	2.82276	-1.43719	-1.44163	-0.793996	-0.745678	-1.0459	-0.806172	2.92271	-2.07109	-2.31404	-1.59041	-0.846356
516	-1.21039	-0.769245	2.84206	-1.49867	-1.51781	-0.804299	-0.697569	-0.804684	-1.02516	2.89905	-2.25167	-2.48308	-1.88819	-0.894057
517	-1.07552	-0.792581	2.92536	-1.55879	-1.65534	-0.789993	-0.662686	-0.596449	-1.25551	2.8615	-2.38727	-2.62282	-2.12336	-0.957126
518	-0.870142	-0.810988	2.6262	-1.73867	-1.88413	-0.811813	-0.678451	-0.398137	-1.4935	2.80213	-2.4815	-2.74317	-2.27751	-1.03916
519	-0.626567	-0.878986	2.23688	-1.76404	-1.86537	-0.778075	-0.632091	-0.178653	-1.73055	2.70307	-2.53208	-2.84944	-2.34316	-1.13263
520	-0.30808	-0.900489	2.14462	-1.92095	-2.01796	-0.749467	-0.642055	0.0898619	-1.95256	2.54403	-2.53158	-2.93967	-2.32287	-1.22074
521	-0.00243829	-0.81065	1.96388	-2.06333	-2.0558	-0.70556	-0.539144	0.422521	-2.14143	2.31102	-2.472	-3.00483	-2.22753	-1.28229
522	0.3979	-0.804693	1.78245	-2.17708	-2.17845	-0.673685	-0.460906	0.816682	-2.27869	2.00299	-2.35092	-3.03193	-2.07422	-1.29791
523	0.72125	-0.797985	1.65172	-2.31213	-2.17425	-0.609484	-0.306524	1.25244	-2.35024	1.63419	-2.17657	-3.00885	-1.88379	-1.25572
524	1.13185	-0.701849	1.40372	-2.37214	-2.23096	-0.544306	-0.13133	1.69791	-2.35058	1.23157	-1.96935	-2.92907	-1.67791	-1.15468
525	1.39387	-0.661874	1.17455	-2.33036	-2.13704	-0.490709	0.0953004	2.11731	-2.28497	0.82839	-1.75896	-2.79445	-1.4757	-1.00468
526	1.56449	-0.690147	1.05859	-2.40197	-2.1425	-0.425943	0.13035	2.47943	-2.16849	0.45638	-1.57766	-2.61515	-1.2906	-0.823407
527	1.93969	-0.587899	0.989534	-2.44007	-2.10005	-0.309609	0.174152	2.76413	-2.0221	0.139174	-1.45188	-2.40716	-1.12812	-0.631226
528	2.19934	-0.591783	0.819367	-2.48138	-2.06581	-0.282181	0.233167	2.96529	-1.867	-0.111128	-1.39513	-2.1883	-0.985679	-0.44576
529	2.35815	-0.530587	0.805043	-2.52542	-2.04578	-0.271472	0.314626	3.08982	-1.71926	-0.293855	-1.4044	-1.97465	-0.854646	-0.278063
530	2.69717	-0.366154	0.845169	-2.65403	-1.9504	-0.206986	0.402497	3.15364	-1.58682	-0.416873	-1.46127	-1.77819	-0.724232	-0.13133
531	2.73747	-0.472903	0.867109	-2.61426	-1.9576	-0.189331	0.356661	3.17614	-1.46938	-0.492453	-1.53737	-1.60637	-0.585843	-0.00228397
532	2.83808	-0.470712	0.766314	-2.53388	-1.72727	-0.205036	0.305427	3.17497	-1.36113	-0.533439	-1.6024	-1.46299	-0.436374	0.115562
533	2.88984	-0.491013	0.76166	-2.37799	-1.63428	-0.181141	0.291	3.16272	-1.2548	-0.550668	-1.632	-1.34946	-0.279326	0.228178
534	2.912	-0.47652	0.665768	-2.25687	-1.56416	-0.156584	0.231951	3.14603	-1.14546	-0.552038	-1.61346	-1.26554	-0.123352	0.338373
535	2.94655	-0.374866	0.63772	-2.09503	-1.57028	-0.117949	0.151368	3.127	-1.03242	-0.543047	-1.54792	-1.20918	0.0211912	0.445134
536	2.9807	-0.361454	0.459531	-1.99098	-1.44526	-0.118521	0.0774629	3.10567	-0.918995	-0.527945	-1.44856	-1.17588	0.146195	0.544858
537	2.92431	-0.380462	0.484986	-1.85468	-1.41366	-0.0969031	0.112797	3.08234	-0.810463	-0.510641	-1.33563	-1.15816	0.248512	0.633596
538	2.90779	-0.403103	0.563801	-1.54727	-1.34057	-0.04315	0.0494331	3.05888	-0.711588	-0.495017	-1.23015	-1.14613	0.330467	0.709258
539	3.06413	-0.334799	0.703562	-1.60757	-1.38183	-0.082226	0.0158715	3.03853	-0.624574	-0.484581	-1.14851	-1.12908	0.398165	0.772816
540	2.97928	-0.291941	0.739194	-1.54358	-1.30557	-0.0457152	0.0163213	3.02483	-0.548333	-0.481644	-1.09903	-1.09798	0.458392	0.828005
541	2.94589	-0.310141	0.723125	-1.49009	-1.33835	-0.0538298	0.0382908	3.02025	-0.47923	-0.486531	-1.08115	-1.04799	0.515572	0.87976
542	2.90745	-0.371078	0.635131	-1.28482	-1.33511	-0.0126914	0.0380007	3.0254	-0.412729	-0.497276	-1.08724	-0.979805	0.57028	0.932267
543	3.03459	-0.3447	0.706284	-1.38762	-1.4867	0.140655	0.029332	3.03912	-0.345047	-0.509993	-1.10594	-0.899269	0.619896	0.987467
544	2.91056	-0.307273	0.71402	-1.36673	-1.47472	0.187213	0.120143	3.05923	-0.274251	-0.52004	-1.12583	-0.815279	0.660883	1.0445
545	2.93987	-0.264089	0.760492	-1.33858	-1.45463	0.161821	0.132996	3.08329	-0.200616	-0.523668	-1.13812	-0.736828	0.691531	1.10016
546	3.02107	-0.295588	0.733109	-1.29078	-1.441	0.189085	0.184926	3.10888	-0.126352	-0.519481	-1.13799	-0.670323	0.713804	1.14995
547	2.9418	-0.275527	0.717141	-1.31923	-1.38781	0.243071	0.199793	3.13338	-0.0548847	-0.509005	-1.12441	-0.618066	0.733202	1.18934
548	2.95827	-0.305634	0.606515	-1.05429	-1.32877	0.337328	0.161005	3.15348	0.0100486	-0.496003	-1.09891	-0.57835	0.756522	1.21491
549	2.93289	-0.390046	0.437951	-0.880165	-1.37	0.317151	0.137965	3.16509	0.065135	-0.484689	-1.06407	-0.546814	0.788436	1.22507
550	2.83904	-0.392844	0.254781	-0.708072	-1.31739	0.342538	0.184882	3.16404	0.107864	-0.477578	-1.02236	-0.518214	0.828486	1.22056
551	2.75948	-0.462844	0.209368	-0.580084	-1.33388	0.330718	0.16014	3.14733	0.136572	-0.474027	-0.975523	-0.487725	0.870084	1.20454
552	2.76508	-0.392948	0.0475118	-0.351935	-1.20812	0.337038	0.219	3.11442	0.150143	-0.47034	-0.924314	-0.451277	0.902261	1.18242
553	2.65207	-0.400515	0.0461285	-0.35231	-1.2226	0.32602	0.21838	3.06773	0.147323	-0.461688	-0.868342	-0.405077	0.913757	1.16114
554	2.53577	-0.509997	0.0411463	-0.241015	-1.23088	0.323463	0.222884	3.0118	0.125904	-0.445249	-0.805726	-0.34497	0.898044	1.14777
555	2.45095	-0.450961	0.104559	-0.261544	-1.26325	0.239908	0.220639	2.95124	0.082202	-0.423127	-0.732591	-0.266416	0.857204	1.14743
556	2.46541	-0.485069	-0.0285403	-0.212355	-1.28794	0.235782	0.240227	2.88821	0.0111818	-0.403428	-0.642815	-0.165583	0.802805	1.16112
557	2.56432	-0.482875	-0.102802	0.0151762	-1.30412	0.232561	0.168375	2.8208	-0.0924821	-0.398541	-0.528489	-0.0414114	0.753103	1.18425
558	2.61832	-0.43428	-0.217975	-0.0529028	-1.21489	0.182678	0.172094	2.74304	-0.232392	-0.42086	-0.38135	0.102284	0.727345	1.20657
559	2.61155	-0.428863	-0.252089	0.106891	-1.14722	0.0823415	0.202363	2.64691	-0.407958	-0.477342	-0.195022	0.255817	0.739102	1.21408
560	2.50556	-0.447348	-0.398777	0.213291	-1.113	0.0174703	0.25825	2.52572	-0.612422	-0.565039	0.032503	0.404533	0.791142	1.19262
561	2.39768	-0.48035	-0.455142	0.398832	-1.20646	0.0442437	0.222493	2.37744	-0.832401	-0.66978	0.297025	0.531706	0.873862	1.13219
562	2.37894	-0.447377	-0.421216	0.493583	-1.24833	0.0122812	0.171271	2.20661	-1.04954	-0.769046	0.587765	0.622698	0.967962	1.03046
563	2.33978	-0.533273	-0.380997	0.583959	-1.15843	-0.0249964	0.123799	2.02388	-1.24419	-0.838456	0.888765	0.668976	1.05045	0.89444
564	2.21536	-0.513599	-0.421265	0.53545	-1.09596	-0.0386591	0.136028	1.8434	-1.4002	-0.859661	1.18173	0.670519	1.10194	0.739448
565	1.96666	-0.690217	-0.46342	0.674398	-1.08238	-0.0527243	0.0559794	1.67888	-1.50927	-0.826753	1.44957	0.635794	1.11248	0.585594
566	1.88234	-0.707662	-0.436457	0.842675	-0.937183	-0.0660348	0.0189833	1.5401	-1.57336	-0.748656	1.67965	0.579254	1.08402	0.45299
567	1.7625	-0.825552	-0.565865	0.99986	-0.90923	0.0338342	-0.0919386	1.43089	-1.60415	-0.646423	1.86569	0.517267	1.02882	0.357211
568	1.61769	-0.830667	-0.609715	1.00425	-0.907969	-0.0385584	-0.0898016	1.34952	-1.61953	-0.546332	2.00811	0.463963	0.964506	0.306345
569	1.57459	-0.883589	-0.587094	0.98785	-0.872778	-0.0656741	-0.0324344	1.29092	-1.63822	-0.471267	2.11294	0.42835	0.907785	0.300333
570	1.52113	-1.10061	-0.709361	1.15641	-0.806739	-0.06036	-0.124523	1.24975	-1.67432	-0.433573	2.1897	0.413381	0.8692	0.332443
571	1.53252	-1.0987	-0.765511	1.16492	-0.812763	-0.112806	-0.0719575	1.22272	-1.73363	-0.43189	2.249	0.416952	0.850699	0.391918
572	1.4891	-1.08946	-0.740857	1.20838	-0.709919	-0.151418	0.0380904	1.20937	-1.81311	-0.452934	2.30031	0.434095	0.846561	0.466591
573	1.3597	-1.04462	-0.746398	1.27166	-0.584048	-0.244542	0.147728	1.21105	-1.90334	-0.47727	2.35065	0.459316	0.846945	0.544764
574	1.169	-1.07087	-0.701643	1.35122	-0.536451	-0.307473	0.191052	1.22868	-1.99306	-0.486651	2.40398	0.488228	0.842514	0.616211
575	1.04919	-1.2062	-0.923649	1.63245	-0.495366	-0.145541	0.111716	1.26061	-2.07387	-0.470212	2.46133	0.518128	0.828206	0.672627
576	0.94245	-1.17465	-0.784129	1.78647	-0.474786	0.000168893	0.178196	1.30148	-2.14315	-0.427393	2.5215	0.547631	0.804668	0.707992
577	0.750192	-1.15207	-0.767241	1.86324	-0.410174	0.0340049	0.205824	1.34288	-2.20414	-0.3668	2.58236	0.575797	0.777048	0.719283
578	0.65617	-1.21396	-0.660478	1.95355	-0.383493	-0.0471743	0.27894	1.37541	-2.26324	-0.301797	2.64216	0.601368	0.751977	0.7075
579	0.672456	-1.22792	-0.713745	1.91147	-0.348021	-0.083989	0.30421	1.3915	-2.32583	-0.244976	2.70077	0.622474	0.734085	0.67838
580	0.535663	-1.1016	-0.75553	1.76691	-0.272149	-0.121886	0.357403	1.38763	-2.3926	-0.203703	2.76009	0.636892	0.723478	0.642046
581	0.463817	-1.16806	-0.731991	1.87328	-0.200711	-0.0991253	0.374048	1.36536	-2.45789	-0.178091	2.82382	0.64263	0.715232	0.611289
582	0.460195	-1.25264	-0.666447	2.00285	-0.134785	-0.0547298	0.34803	1.33069	-2.51114	-0.161841	2.89625	0.638595	0.701064	0.598706
583	0.475044	-1.23648	-0.678718	1.97409	-0.124519	-0.0509356	0.253175	1.29199	-2.54076	-0.145359	2.98066	0.62501	0.672315	0.61356
584	0.531702	-1.25355	-0.743567	1.79312	-0.146471	-0.104987	0.173952	1.2572	-2.53916	-0.119753	3.07775	0.60331	0.623026	0.659511
585	0.655304	-1.21149	-0.743384	1.71599	-0.170554	-0.0828963	0.176318	1.2313	-2.50668	-0.0801436	3.18489	0.575502	0.551973	0.734048
586	0.634343	-1.12333	-0.728475	1.69271	-0.215668	-0.075336	0.284055	1.215	-2.45253	-0.0273065	3.2963	0.543271	0.462998	0.829676
587	0.689392	-0.946513	-0.712735	1.64908	-0.261577	-0.0529719	0.295823	1.20467	-2.39228	0.0325907	3.40427	0.507132	0.36368	0.936272
588	0.827495	-0.877452	-0.755116	1.59098	-0.264696	-0.0788018	0.196534	1.19371	-2.34264	0.0898386	3.50074	0.465953	0.263069	1.04361
589	0.783771	-0.844721	-0.826561	1.3951	-0.228251	-0.113377	0.13534	1.17492	-2.31554	0.133972	3.57881	0.417121	0.169341	1.14306
590	0.805583	-0.77436	-0.808034	1.40021	-0.225014	0.00574713	-0.000638194	1.1432	-2.31352	0.156639	3.63355	0.35747	0.088122	1.22803
591	0.766464	-0.748667	-0.815971	1.3341	-0.19019	0.0450549	-0.033819	1.09771	-2.3284	0.153695	3.66217	0.28472	0.0217597	1.29363
592	0.803107	-0.691108	-0.972107	1.17024	-0.201754	0.0994242	-0.0414094	1.04285	-2.34351	0.126048	3.66354	0.198922	-0.030635	1.3363
593	0.893411	-0.675776	-1.00315	1.11816	-0.181917	0.10635	-0.0658916	0.987784	-2.33882	0.079246	3.63794	0.103369	-0.0727345	1.35412
594	0.803419	-0.611114	-0.800772	1.17558	-0.0674595	0.0623372	-0.153894	0.944649	-2.29695	0.0219156	3.58686	0.00452863	-0.110338	1.34787
595	0.901	-0.504227	-0.852551	1.07136	0.0208022	0.123339	-0.164898	0.92564	-2.20811	-0.0366564	3.51285	-0.0891017	-0.150463	1.3226
596	0.892196	-0.524769	-0.937883	0.959759	0.00804341	0.241486	-0.242048	0.939819	-2.0727	-0.0890318	3.41913	-0.168857	-0.200037	1.28823
597	0.934777	-0.410491	-0.943069	0.962217	0.178455	0.179694	-0.343804	0.990595	-1.90066	-0.131276	3.30875	-0.227887	-0.264293	1.25814
598	0.978926	-0.391365	-1.05071	0.843169	0.223086	0.270853	-0.306528	1.07463	-1.70886	-0.163325	3.18328	-0.262499	-0.345146	1.24566
599	0.83965	-0.432669	-0.986034	0.697669	0.291814	0.306467	-0.239907	1.18244	-1.51749	-0.188029	3.04138	-0.272335	-0.439995	1.25946
600	0.735686	-0.465554	-0.940541	0.723881	0.340098	0.427441	-0.228413	1.30067	-1.34654	-0.209126	2.8784	-0.259465	-0.541611	1.29954
601	0.564851	-0.448129	-0.910527	0.653767	0.284008	0.443688	-0.30608	1.41529	-1.2129	-0.228934	2.68758	-0.227054	-0.639546	1.35561
602	0.642653	-0.522216	-0.999715	0.615181	0.215844	0.48551	-0.413166	1.51484	-1.12827	-0.246861	2.46293	-0.178315	-0.722805	1.40928
603	0.502141	-0.614272	-0.901929	0.686242	0.231793	0.500621	-0.443025	1.59257	-1.0976	-0.259428	2.20293	-0.11626	-0.782959	1.43949
604	0.445135	-0.62701	-0.851929	0.512374	0.202953	0.504005	-0.471639	1.64694	-1.11794	-0.261758	1.91354	-0.0444021	-0.816686	1.42942
605	0.369902	-0.690115	-0.825089	0.418069	0.202746	0.514032	-0.487847	1.68025	-1.17797	-0.249889	1.60902	0.0320593	-0.826707	1.37235
606	0.254268	-0.642531	-0.697242	0.364301	0.216583	0.482178	-0.53578	1.69597	-1.25877	-0.222902	1.30956	0.105444	-0.820704	1.27413
607	0.39643	-0.503265	-0.55645	0.258387	0.272805	0.484327	-0.592315	1.69574	-1.33643	-0.183881	1.03629	0.166005	-0.808773	1.15127
608	0.432845	-0.448502	-0.654182	0.206609	0.259119	0.458379	-0.544432	1.67722	-1.3863	-0.139228	0.80523	0.203793	-0.800482	1.02521
609	0.383266	-0.549116	-0.668627	0.0824577	0.195909	0.422219	-0.597844	1.63373	-1.38804	-0.0966532	0.622304	0.21157	-0.802551	0.915048
610	0.25202	-0.493132	-0.666026	-0.0529781	0.186782	0.458004	-0.660828	1.556	-1.33023	-0.0627668	0.481702	0.187633	-0.817795	0.831282
611	0.152833	-0.524501	-0.642661	-0.160826	0.18323	0.389502	-0.727565	1.43578	-1.21281	-0.0413303	0.368313	0.137267	-0.845376	0.77275
612	0.195271	-0.489057	-0.608715	-0.257505	0.18968	0.333587	-0.728921	1.27022	-1.04639	-0.0329459	0.263512	0.0720791	-0.881694	0.727728
613	0.117449	-0.518625	-0.719507	-0.361103	0.29695	0.261501	-0.732788	1.06555	-0.848788	-0.0362103	0.152103	0.00721903	-0.921118	0.678517
614	0.0369025	-0.510858	-0.697085	-0.414887	0.348565	0.0765199	-0.77157	0.838464	-0.640103	-0.0496727	0.0277851	-0.0427756	-0.956257	0.607742
615	-0.0616578	-0.525838	-0.811678	-0.481288	0.375782	-0.00444209	-0.77084	0.61426	-0.43824	-0.0736187	-0.104887	-0.0680003	-0.978069	0.504169
616	-0.124611	-0.633186	-0.875627	-0.521416	0.322137	-0.0733776	-0.805633	0.421683	-0.25645	-0.110745	-0.232683	-0.065499	-0.976472	0.366412
617	-0.192638	-0.636085	-0.886256	-0.562171	0.41013	-0.135124	-0.866074	0.285729	-0.103425	-0.165299	-0.338979	-0.0391343	-0.94213	0.203723
618	-0.253167	-0.606046	-0.857906	-0.594599	0.397063	-0.149781	-0.94043	0.220283	0.0147496	-0.241003	-0.409992	0.00277561	-0.869471	0.0339732
619	-0.175217	-0.536462	-0.846098	-0.687619	0.425792	-0.214598	-0.926569	0.222915	0.0923751	-0.338542	-0.43949	0.0511145	-0.760075	-0.120488
620	-0.302804	-0.65426	-0.870136	-0.796645	0.341339	-0.20871	-0.965553	0.27368	0.123264	-0.45349	-0.430388	0.0994204	-0.624886	-0.238075
621	-0.33469	-0.760648	-0.920578	-0.794169	0.272094	-0.219655	-0.984343	0.338622	0.101934	-0.575353	-0.393021	0.145729	-0.483815	-0.303205
622	-0.494953	-0.881853	-0.93455	-0.705567	0.256502	-0.255844	-0.959003	0.377283	0.0263708	-0.688035	-0.341185	0.192214	-0.362182	-0.310466
623	-0.642197	-0.863117	-0.80554	-0.713536	0.175732	-0.297784	-0.957233	0.3522	-0.0991469	-0.771679	-0.287773	0.242845	-0.284622	-0.266743
624	-0.64688	-1.0667	-0.672131	-0.827985	0.0508682	-0.396757	-0.999462	0.237702	-0.262838	-0.805692	-0.241862	0.299991	-0.268296	-0.19055
625	-0.598807	-1.17971	-0.706553	-0.721983	0.0470098	-0.513716	-1.10111	0.0256779	-0.446907	-0.772548	-0.208159	0.361376	-0.317785	-0.108357
626	-0.62279	-1.21784	-0.647498	-0.946895	-0.206945	-0.46085	-1.14761	-0.272932	-0.631517	-0.661714	-0.188683	0.418654	-0.423539	-0.0484033
627	-0.567037	-1.18044	-0.641594	-1.12218	-0.326675	-0.438279	-1.14813	-0.630887	-0.799752	-0.472952	-0.185596	0.458154	-0.564562	-0.0333346
628	-0.52762	-1.21223	-0.629646	-1.36828	-0.502633	-0.428449	-1.10549	-1.01048	-0.941676	-0.218174	-0.203641	0.463693	-0.714578	-0.07375
629	-0.303161	-1.13485	-0.460595	-1.60887	-0.76422	-0.392086	-1.12382	-1.37062	-1.05604	0.0789534	-0.250745	0.420665	-0.849568	-0.164887
630	-0.0135919	-1.15412	-0.429875	-1.87963	-1.0154	-0.244823	-1.15312	-1.67346	-1.14922	0.386208	-0.336276	0.320176	-0.953956	-0.287773
631	0.031924	-1.12498	-0.519345	-1.84685	-1.06539	-0.255762	-0.990623	-1.8894	-1.23204	0.668613	-0.467586	0.161961	-1.02346	-0.414761
632	0.0159967	-1.09592	-0.575314	-2.03042	-1.15852	-0.294109	-0.879881	-1.99989	-1.31605	0.895678	-0.646202	-0.0447546	-1.064	-0.517908
633	0.202028	-0.999938	-0.467569	-2.10441	-1.17373	-0.155905	-0.765193	-1.99843	-1.41068	1.04806	-0.865307	-0.282762	-1.08744	-0.577385
634	0.25495	-0.998798	-0.373	-2.11364	-1.36766	-0.130839	-0.743126	-1.89	-1.52202	1.12148	-1.10974	-0.530385	-1.10599	-0.586947
635	0.277487	-0.995049	-0.27472	-2.17526	-1.41504	-0.149847	-0.644471	-1.68949	-1.65301	1.1264	-1.35882	-0.765982	-1.12742	-0.554649
636	0.450194	-1.08635	-0.313611	-2.25607	-1.51356	-0.137425	-0.571666	-1.41935	-1.80413	1.08332	-1.59105	-0.972171	-1.15283	-0.498804
637	0.583776	-0.967082	-0.196587	-2.31577	-1.6388	-0.129621	-0.461977	-1.1065	-1.97369	1.01509	-1.78913	-1.13867	-1.17762	-0.440857
638	0.918103	-1.00854	-0.325843	-2.15897	-1.50917	-0.156161	-0.347699	-0.778806	-2.15728	0.938864	-1.94344	-1.26306	-1.19456	-0.397962
639	1.00036	-1.07993	-0.398076	-2.16966	-1.47712	-0.158503	-0.348592	-0.4615	-2.34701	0.860672	-2.05275	-1.3493	-1.19749	-0.37813
640	1.09314	-1.10626	-0.449908	-1.96914	-1.34854	-0.160004	-0.382136	-0.174112	-2.53126	0.774733	-2.12208	-1.40471	-1.18382	-0.379447
641	1.28476	-1.10885	-0.613454	-1.7739	-1.26962	-0.193382	-0.291649	0.0716166	-2.69563	0.667829	-2.15861	-1.43636	-1.15502	-0.39304
642	1.34554	-1.19646	-0.629301	-1.633	-1.3216	-0.0506459	-0.420783	0.272523	-2.82536	0.52706	-2.16757	-1.4481	-1.11503	-0.408139
643	1.44777	-1.17681	-0.600903	-1.5687	-1.21442	-0.0375597	-0.434006	0.433386	-2.90848	0.347766	-2.14998	-1.43924	-1.06769	-0.416962
644	1.55661	-1.26411	-0.633433	-1.60508	-1.11376	-0.00698719	-0.440933	0.56491	-2.93859	0.138143	-2.10305	-1.40531	-1.01484	-0.417493
645	1.71235	-1.33602	-0.605791	-1.51626	-0.996494	0.013589	-0.550798	0.680692	-2.91644	-0.0815806	-2.02279	-1.34045	-0.955935	-0.41339
646	1.78566	-1.29987	-0.781703	-1.271	-0.886238	0.0166377	-0.542328	0.793586	-2.84962	-0.285453	-1.90741	-1.24067	-0.889512	-0.411627
647	1.89945	-1.37433	-0.578096	-1.22954	-0.943361	-0.0136861	-0.691544	0.911831	-2.75089	-0.451367	-1.75969	-1.10661	-0.815737	-0.419252
648	1.88789	-1.52852	-0.633237	-0.981298	-0.725954	0.0468242	-0.71413	1.03561	-2.63579	-0.570129	-1.58647	-0.944766	-0.738474	-0.440677
649	1.86151	-1.59467	-0.910183	-0.613782	-0.58026	0.125843	-0.729254	1.15514	-2.52065	-0.650158	-1.39552	-0.766636	-0.665515	-0.476469
650	1.74663	-1.58585	-0.732872	-0.428145	-0.442868	0.149338	-0.757722	1.25123	-2.42104	-0.715535	-1.19097	-0.58598	-0.606389	-0.523763
651	1.62988	-1.55295	-0.535374	-0.446964	-0.39542	0.232214	-0.815001	1.29876	-2.3507	-0.797699	-0.969574	-0.415126	-0.568432	-0.577673
652	1.56974	-1.63348	-0.778093	-0.0276234	-0.243847	0.24171	-0.906632	1.27275	-2.32036	-0.923505	-0.71994	-0.261701	-0.552682	-0.63294
653	1.34742	-1.8297	-0.762733	0.185803	-0.16981	0.304141	-0.933496	1.15594	-2.33635	-1.10405	-0.425844	-0.127085	-0.551398	-0.685247
654	1.43767	-1.9279	-0.812099	0.36457	-0.201177	0.275013	-1.1003	0.945664	-2.39908	-1.32863	-0.072925	-0.00735806	-0.54851	-0.731889
655	1.47483	-1.94568	-0.807414	0.811618	-0.108424	0.243982	-1.11734	0.657503	-2.50206	-1.56637	0.343883	0.103449	-0.52335	-0.771777
656	1.22636	-2.068	-0.859187	1.23967	0.0981125	0.255854	-1.01415	0.323676	-2.6321	-1.77502	0.81542	0.209083	-0.456562	-0.804953
657	1.1608	-1.97164	-0.84259	1.45494	0.101659	0.137966	-0.994616	-0.0139958	-2.77126	-1.91393	1.31837	0.307556	-0.336111	-0.83166
658	0.94325	-1.94269	-1.07611	2.19149	0.191577	0.159437	-1.06435	-0.31485	-2.90066	-1.95627	1.82093	0.389887	-0.161321	-0.851053
659	0.765638	-2.0351	-1.10487	2.37365	0.323381	0.0775115	-0.998828	-0.550588	-3.00494	-1.8964	2.29233	0.441914	0.0563392	-0.859856
660	0.519127	-2.05668	-1.16043	2.84747	0.448828	0.155584	-1.06888	-0.713088	-3.0761	-1.74986	2.71281	0.448843	0.295796	-0.851581
661	0.445838	-2.05358	-1.07714	3.31932	0.604971	0.0943181	-1.04111	-0.815751	-3.11508	-1.54639	3.07988	0.400926	0.531206	-0.81692
662	0.232169	-2.09309	-1.25005	3.87059	0.695937	0.190109	-0.948565	-0.887562	-3.13064	-1.31887	3.4078	0.298094	0.737653	-0.745653
663	0.00884455	-2.2571	-1.19685	4.18402	0.790242	0.25971	-0.986711	-0.961737	-3.1358	-1.09275	3.72022	0.151793	0.896218	-0.629913
664	-0.00643457	-2.2036	-1.12377	4.10516	0.759978	0.322946	-0.929566	-1.06288	-3.14318	-0.879736	4.03844	-0.0168013	0.997165	-0.46801
665	-0.265111	-2.22777	-1.14744	4.30092	0.804672	0.45407	-0.84514	-1.19728	-3.16076	-0.677388	4.36983	-0.181611	1.04079	-0.26729
666	-0.44395	-2.27272	-1.11883	4.54983	0.92136	0.514034	-0.800674	-1.35006	-3.18958	-0.474098	4.70107	-0.317828	1.03634	-0.0444679
667	-0.604776	-2.21488	-1.09677	4.81417	0.994733	0.618649	-0.826314	-1.49021	-3.22398	-0.25685	4.99931	-0.407369	0.999484	0.177193
668	-0.60411	-2.25789	-1.22935	4.72906	0.892462	0.889205	-0.790584	-1.5818	-3.25429	-0.0183115	5.2215	-0.441979	0.948858	0.373316
669	-0.834244	-2.44621	-1.18765	4.90478	0.976861	1.02476	-0.741352	-1.59706	-3.27068	0.239641	5.32868	-0.423261	0.902419	0.524808
670	-0.861488	-2.36041	-1.06792	4.69316	0.914169	1.16163	-0.676258	-1.52672	-3.26674	0.506973	5.30007	-0.360138	0.87438	0.622962
671	-1.00446	-2.45157	-1.03298	4.64531	1.01795	1.21291	-0.619554	-1.38379	-3.24169	0.770223	5.14166	-0.265123	0.873084	0.671327
672	-1.15838	-2.59553	-0.941093	4.62945	1.04727	1.3109	-0.533818	-1.19964	-3.20034	1.01866	4.88594	-0.150881	0.900236	0.683695
673	-1.23521	-2.54303	-0.872351	4.41586	1.11308	1.30122	-0.462375	-1.01387	-3.15092	1.24918	4.58287	-0.0280729	0.951757	0.678998
674	-1.31025	-2.60591	-0.657577	4.42194	1.07495	1.2559	-0.289063	-0.862039	-3.10175	1.46793	4.28521	0.0952541	1.01989	0.675033
675	-1.33833	-2.51497	-0.489142	4.14276	1.08572	1.29137	-0.236055	-0.765617	-3.05785	1.68823	4.03371	0.213141	1.09567	0.683331
676	-1.24453	-2.53974	-0.522216	3.9769	0.991943	1.35579	-0.172683	-0.727509	-3.01878	1.92555	3.84735	0.32083	1.1708	0.70686
677	-1.19712	-2.68171	-0.414756	3.98474	0.931701	1.4992	-0.239012	-0.734091	-2.97814	2.19159	3.72183	0.414096	1.23841	0.740981
678	-1.29739	-2.67771	-0.17648	3.97895	0.907619	1.56861	-0.153022	-0.762486	-2.92521	2.48959	3.63628	0.489034	1.2927	0.776759
679	-1.2581	-2.82465	0.0590707	4.08335	0.957432	1.57603	0.00658996	-0.789984	-2.84791	2.81251	3.56503	0.542281	1.32785	0.804976
680	-1.08095	-2.70124	0.213064	3.78118	0.954389	1.6097	0.176053	-0.801995	-2.73646	3.14446	3.48931	0.571476	1.33739	0.819247
681	-1.19587	-2.66309	0.419236	3.86821	0.885899	1.57382	0.276799	-0.795869	-2.58636	3.46476	3.40424	0.575819	1.31492	0.817422
682	-1.11467	-2.65208	0.568516	3.67055	0.832555	1.5865	0.344059	-0.779771	-2.40018	3.75326	3.31869	0.556677	1.25636	0.801279
683	-1.14528	-2.55643	0.731748	3.60534	0.76682	1.57976	0.45115	-0.767719	-2.18753	3.99513	3.24876	0.518089	1.16293	0.775138
684	-1.05573	-2.45061	0.767874	3.51835	0.705701	1.47879	0.45611	-0.773192	-1.96333	4.18353	3.208	0.46695	1.0434	0.744314
685	-0.989262	-2.43117	1.03114	3.38156	0.639769	1.60675	0.508944	-0.80385	-1.74494	4.31961	3.19895	0.412577	0.914285	0.714069
686	-1.02105	-2.44182	1.02149	3.21441	0.531143	1.62327	0.562478	-0.859097	-1.54906	4.41022	3.20937	0.365485	0.79733	0.68902
687	-1.20867	-2.30352	1.43311	3.23035	0.446977	1.72103	0.573849	-0.930959	-1.38889	4.46453	3.21495	0.335327	0.714555	0.672701
688	-1.29197	-2.38025	1.60948	3.21984	0.339216	1.72013	0.595066	-1.00753	-1.27223	4.49089	3.18723	0.328435	0.682399	0.66706
689	-1.26019	-2.23726	1.77539	3.25223	0.311664	1.71981	0.694244	-1.07728	-1.20078	4.49496	3.10366	0.345752	0.70706	0.671886
690	-1.25359	-2.02123	2.10822	3.24718	0.306929	1.5662	0.839447	-1.13235	-1.17065	4.47947	2.95554	0.381955	0.782911	0.68444
691	-1.10067	-2.20531	2.39554	3.14929	0.238785	1.62803	0.754363	-1.16983	-1.17367	4.44526	2.75115	0.426241	0.894441	0.699865
692	-1.06515	-1.95527	2.73692	3.00694	0.36048	1.60565	0.821439	-1.1907	-1.19918	4.39294	2.51305	0.464738	1.0209	0.712718
693	-1.15547	-1.96943	2.94141	2.98462	0.373142	1.61833	0.847534	-1.19752	-1.23621	4.32377	2.27068	0.483851	1.14198	0.719288
694	-1.32108	-1.80243	3.23994	2.82099	0.329208	1.75313	0.895243	-1.19201	-1.27552	4.23948	2.0511	0.473455	1.24254	0.719708
695	-1.34999	-1.68365	3.4908	2.84164	0.204902	1.73906	0.82839	-1.17394	-1.31118	4.14135	1.87138	0.428992	1.31472	0.718798
696	-1.36779	-1.60621	3.623	2.77658	0.240109	1.81784	0.845571	-1.14159	-1.34138	4.02943	1.73525	0.35205	1.3572	0.725012
697	-1.42713	-1.46504	3.94897	2.53156	0.111592	1.74314	0.787863	-1.09367	-1.36838	3.90251	1.63455	0.249489	1.37248	0.747558
698	-1.38555	-1.46577	4.07237	2.39195	-0.0581817	1.78207	0.836455	-1.03158	-1.39703	3.75932	1.55467	0.131609	1.36369	0.792445
699	-1.20118	-1.43198	4.19617	2.22458	-0.18231	1.8363	0.904761	-0.960898	-1.43253	3.60076	1.48145	0.0099936	1.33242	0.858912
700	-1.10908	-1.49153	4.32832	2.26475	-0.331545	1.92755	0.898479	-0.891086	-1.47798	3.4317	1.40683	-0.104642	1.27847	0.938086
701	-0.932463	-1.47957	4.23186	2.09735	-0.58147	1.8616	0.870276	-0.833523	-1.53255	3.26137	1.33122	-0.20435	1.2012	1.01479
702	-0.737383	-1.6036	4.27686	1.93111	-0.725924	1.8791	0.894088	-0.798242	-1.59078	3.10202	1.26204	-0.285316	1.10174	1.07191
703	-0.829566	-1.49064	4.37457	1.6573	-0.860206	1.82018	0.89292	-0.790776	-1.64347	2.96578	1.20922	-0.348525	0.98442	1.09594
704	-0.708667	-1.44827	4.39737	1.54462	-0.976668	1.68492	0.920878	-0.810774	-1.68005	2.86036	1.17956	-0.399582	0.856645	1.08184
705	-0.728719	-1.47182	4.38232	1.47799	-1.04328	1.73651	0.916425	-0.852821	-1.69162	2.7859	1.17259	-0.447299	0.727237	1.03517
706	-0.778827	-1.55706	4.51848	1.51066	-1.24487	1.66824	0.948756	-0.908985	-1.67345	2.73473	1.17914	-0.500882	0.604276	0.970261
707	-0.819427	-1.5853	4.38751	1.35358	-1.27275	1.53505	0.984179	-0.972377	-1.62645	2.69351	1.18316	-0.566529	0.492945	0.905337
708	-0.89978	-1.4808	4.25498	1.23556	-1.30358	1.43824	0.952205	-1.04045	-1.55693	2.64682	1.166	-0.644586	0.394249	0.85639
709	-1.00246	-1.26885	4.22518	1.20758	-1.41314	1.50354	1.17219	-1.11632	-1.47488	2.58137	1.1115	-0.7283	0.305434	0.831753
710	-1.05283	-1.30252	3.93722	1.01853	-1.57463	1.40651	1.2167	-1.20752	-1.39138	2.48915	1.00988	-0.804996	0.221936	0.829269
711	-1.21522	-1.12888	3.78799	0.879358	-1.59919	1.29513	1.16157	-1.32274	-1.31598	2.36845	0.859722	-0.859729	0.13981	0.837149
712	-1.11117	-1.13793	3.57666	0.724088	-1.64883	1.32779	1.12266	-1.46776	-1.25473	2.22295	0.667946	-0.880185	0.0575831	0.837873
713	-1.59072	-1.0968	3.44669	0.544358	-1.73668	1.18166	1.08619	-1.64195	-1.20929	2.05995	0.448515	-0.860785	-0.023147	0.813353
714	-1.61568	-1.00541	3.3945	0.460192	-1.75563	1.0793	1.11202	-1.83641	-1.17738	1.88848	0.220513	-0.80442	-0.0985441	0.74957
715	-1.72344	-0.985624	3.12041	0.362445	-1.77186	0.915197	0.995149	-2.03467	-1.15404	1.71777	0.0060579	-0.721165	-0.164476	0.639442
716	-1.82458	-0.896802	2.79932	0.224835	-1.68925	0.784582	0.903561	-2.21582	-1.13332	1.5561	-0.172187	-0.62437	-0.218803	0.483468
717	-1.77435	-0.700137	2.49805	0.16226	-1.63178	0.613672	0.797914	-2.35922	-1.10992	1.40952	-0.294424	-0.525586	-0.262933	0.288769
718	-1.80337	-0.710906	2.35871	0.0902269	-1.4612	0.622857	0.62998	-2.44913	-1.08067	1.28019	-0.348143	-0.430465	-0.301791	0.0675752
719	-1.92857	-0.746049	2.16446	0.0185838	-1.37172	0.407348	0.488023	-2.47816	-1.04554	1.16453	-0.33274	-0.33725	-0.342054	-0.164135
720	-2.02355	-0.695432	1.9253	-0.150475	-1.13275	0.166656	0.444981	-2.44827	-1.00787	1.0521	-0.262526	-0.23821	-0.389275	-0.387883
721	-2.02043	-0.707751	1.66804	-0.256257	-1.02168	-0.0203078	0.316358	-2.36924	-0.973931	0.926442	-0.166046	-0.123203	-0.445021	-0.584352
722	-2.23964	-0.68385	1.55964	-0.387385	-0.8801	-0.20369	0.202041	-2.25526	-0.952029	0.768618	-0.0805303	0.0161384	-0.505121	-0.736063
723	-2.23049	-0.573457	1.45628	-0.456047	-0.736708	-0.373021	0.0160327	-2.12098	-0.951375	0.563119	-0.0421062	0.183136	-0.55981	-0.831049
724	-2.17835	-0.552505	1.23094	-0.517047	-0.547011	-0.537862	-0.0984963	-1.97859	-0.980824	0.304382	-0.0744718	0.374639	-0.596226	-0.866587
725	-2.15482	-0.533875	1.12652	-0.56932	-0.440363	-0.589465	-0.213606	-1.83716	-1.04765	0.00162219	-0.180089	0.581577	-0.60282	-0.851321
726	-2.17115	-0.570906	0.869516	-0.695638	-0.282488	-0.711245	-0.306334	-1.70441	-1.15635	-0.320051	-0.337672	0.790903	-0.574146	-0.804204
727	-2.04853	-0.642535	0.662878	-0.763309	-0.133378	-0.651985	-0.393353	-1.58992	-1.30729	-0.623164	-0.507769	0.987928	-0.51426	-0.749782
728	-2.08221	-0.72311	0.538374	-0.885478	0.0130777	-0.739245	-0.404842	-1.50774	-1.49521	-0.86527	-0.64515	1.15821	-0.437433	-0.710826
729	-2.13762	-0.573126	0.187929	-0.945873	0.226715	-0.712949	-0.36119	-1.4763	-1.70798	-1.00795	-0.713777	1.28885	-0.365556	-0.70079
730	-2.08687	-0.638461	0.060449	-1.05312	0.354787	-0.738419	-0.345871	-1.51466	-1.92606	-1.02468	-0.698955	1.36931	-0.322554	-0.719184
731	-2.25893	-0.715056	-0.0460502	-1.15354	0.412453	-0.749824	-0.348529	-1.63566	-2.12389	-0.905421	-0.612264	1.3922	-0.327492	-0.752069
732	-2.23598	-0.707232	0.0648935	-1.19133	0.422668	-0.772519	-0.464187	-1.83825	-2.2737	-0.657023	-0.487428	1.35393	-0.388745	-0.777833
733	-2.1755	-0.743023	0.0736373	-1.33202	0.498047	-0.710316	-0.492487	-2.10235	-2.35158	-0.300289	-0.368757	1.25528	-0.501125	-0.776281
734	-2.05889	-0.79292	0.107756	-1.49785	0.426973	-0.688603	-0.520311	-2.38933	-2.34436	0.134725	-0.296757	1.10162	-0.646912	-0.737534
735	-2.04217	-1.00617	0.0549936	-1.51404	0.422716	-0.628381	-0.526051	-2.64894	-2.25518	0.613331	-0.29633	0.902431	-0.800617	-0.666991
736	-2.00083	-1.19066	0.362986	-1.46945	0.404393	-0.681427	-0.569682	-2.83139	-2.10528	1.09969	-0.371519	0.670001	-0.936128	-0.584216
737	-1.80154	-1.22692	0.619885	-1.67762	0.166163	-0.711058	-0.569151	-2.90066	-1.93067	1.559	-0.507962	0.417563	-1.03386	-0.516213
738	-1.60658	-1.28082	1.03797	-1.87953	-0.0637439	-0.735118	-0.616236	-2.84441	-1.77379	1.95919	-0.681161	0.157236	-1.08554	-0.487683
739	-1.51305	-1.04608	1.41386	-1.82528	-0.34499	-0.795099	-0.678303	-2.67681	-1.67275	2.27302	-0.866534	-0.101692	-1.09534	-0.51207
740	-1.31824	-1.23919	1.84649	-2.00945	-0.657482	-0.708309	-0.727875	-2.43298	-1.65127	2.48083	-1.04719	-0.353743	-1.07708	-0.586932
741	-0.84474	-1.14262	2.01441	-2.10418	-0.918687	-0.650354	-0.706142	-2.157	-1.71303	2.57365	-1.21696	-0.597155	-1.0489	-0.695182
742	-0.445188	-1.23868	2.16346	-2.19321	-1.21844	-0.649987	-0.840565	-1.88773	-1.84231	2.55524	-1.37849	-0.832718	-1.02702	-0.811318
743	-0.291761	-1.41977	2.11331	-2.10928	-1.45249	-0.637092	-0.874777	-1.64773	-2.01066	2.44204	-1.53783	-1.06207	-1.02082	-0.910135
744	-0.0894449	-1.33415	2.18238	-2.08426	-1.61153	-0.503267	-0.776007	-1.43904	-2.18699	2.26013	-1.69873	-1.28582	-1.03061	-0.974609
745	0.100102	-1.42187	2.21475	-2.08752	-1.75846	-0.465261	-0.765077	-1.2468	-2.34702	2.03985	-1.85889	-1.5018	-1.04885	-0.99997
746	0.564197	-1.47338	2.11602	-2.20568	-1.88685	-0.474164	-0.701483	-1.04845	-2.47897	1.80947	-2.00945	-1.70406	-1.06366	-0.992899
747	0.781473	-1.53423	1.96855	-2.30199	-1.97348	-0.400168	-0.775621	-0.824777	-2.58352	1.58982	-2.13754	-1.88309	-1.06353	-0.96705
748	0.850824	-1.65291	1.69102	-2.2352	-2.04212	-0.450849	-0.835452	-0.568202	-2.66898	1.39143	-2.23023	-2.02753	-1.04125	-0.937081
749	0.792822	-1.63592	1.35637	-2.16999	-1.95828	-0.484991	-0.749736	-0.285599	-2.74413	1.215	-2.27845	-2.12663	-0.996018	-0.913395
750	0.976847	-1.79555	1.12188	-2.06293	-1.8711	-0.470378	-0.780182	0.00496168	-2.81226	1.05446	-2.27967	-2.17311	-0.932821	-0.899362
751	1.14466	-1.77034	0.900514	-1.96137	-1.86666	-0.465885	-0.831727	0.28141	-2.86872	0.901311	-2.23877	-2.16534	-0.859985	-0.891743
752	1.17668	-1.90071	0.58602	-1.70333	-1.78393	-0.443971	-0.888229	0.525542	-2.90277	0.748595	-2.167	-2.10782	-0.786031	-0.88335
753	1.4167	-1.97289	0.238469	-1.45383	-1.69116	-0.529176	-1.00872	0.728279	-2.90247	0.593132	-2.07904	-2.0097	-0.717101	-0.866461
754	1.51479	-2.09062	0.107681	-1.19264	-1.59255	-0.585829	-1.10813	0.890435	-2.86036	0.435557	-1.9893	-1.88171	-0.655819	-0.835947
755	1.441	-2.12719	-0.192672	-0.717737	-1.40733	-0.582376	-1.13076	1.01926	-2.77742	0.278736	-1.90768	-1.73271	-0.601968	-0.79135
756	1.52656	-2.13826	-0.250256	-0.59746	-1.3837	-0.519534	-1.17625	1.12269	-2.66383	0.125501	-1.836	-1.56749	-0.554315	-0.737351
757	1.41985	-2.0671	-0.359147	-0.125511	-1.08659	-0.598051	-1.07762	1.20383	-2.53668	-0.0234897	-1.7661	-1.38675	-0.512306	-0.682856
758	1.37172	-1.8774	-0.720104	0.204791	-1.06414	-0.456139	-1.09536	1.25767	-2.41603	-0.170932	-1.68049	-1.18956	-0.476644	-0.639425
759	1.14098	-1.91198	-0.861615	0.473953	-0.887435	-0.427479	-0.942203	1.2715	-2.32069	-0.322492	-1.55586	-0.977119	-0.448416	-0.619363
760	0.643538	-1.90967	-0.964723	0.952602	-0.719002	-0.324564	-0.949515	1.22877	-2.26532	-0.485183	-1.369	-0.756122	-0.427264	-0.63342
761	0.36138	-1.93439	-1.01972	1.14051	-0.612971	-0.232084	-0.887267	1.11483	-2.25923	-0.665077	-1.10378	-0.539795	-0.409752	-0.688311
762	0.204622	-1.94906	-1.04263	1.39799	-0.553762	-0.171501	-0.832394	0.922816	-2.30635	-0.86439	-0.756513	-0.345601	-0.38912	-0.784693
763	0.146895	-1.96775	-1.08068	1.46501	-0.393933	-0.0824431	-0.820842	0.658084	-2.40555	-1.07861	-0.338234	-0.18999	-0.356981	-0.916072
764	0.0438171	-2.00311	-1.17995	1.87674	-0.343538	0.0251535	-0.822475	0.339588	-2.55092	-1.29516	0.127257	-0.082342	-0.306695	-1.06871
765	-0.0609645	-2.11043	-1.18029	2.04982	-0.343706	0.182044	-0.93112	-0.00219442	-2.73187	-1.49421	0.608983	-0.0208046	-0.236827	-1.22285
766	-0.0302361	-2.14864	-1.29174	2.14644	-0.433784	0.265362	-0.992328	-0.330126	-2.93341	-1.65148	1.07634	0.00800345	-0.152709	-1.35549
767	-0.260065	-2.21617	-1.37803	2.37437	-0.438992	0.378413	-1.06547	-0.607135	-3.1372	-1.74318	1.50605	0.0246994	-0.0652288	-1.44395
768	-0.327019	-2.24647	-1.39401	2.62919	-0.437642	0.423367	-1.13074	-0.803786	-3.32393	-1.75293	1.88643	0.049492	0.0127151	-1.4693
769	-0.266344	-2.31938	-1.449	2.59695	-0.331829	0.58164	-1.07299	-0.904926	-3.47676	-1.67809	2.2179	0.0942158	0.0709142	-1.41934
770	-0.394758	-2.1137	-1.63449	2.75997	-0.247472	0.745313	-1.05346	-0.913528	-3.58495	-1.53309	2.51	0.157477	0.105849	-1.29091
771	-0.485592	-2.2249	-1.6315	2.88969	-0.130337	0.658788	-0.916142	-0.850665	-3.64634	-1.34784	2.77622	0.225014	0.122018	-1.09102
772	-0.65964	-2.11363	-1.78237	3.07151	-0.0969994	0.822454	-0.956624	-0.75144	-3.66789	-1.16123	3.02889	0.275316	0.129834	-0.836648
773	-0.674612	-2.19215	-1.6052	3.07486	-0.00671115	0.785048	-0.942918	-0.657445	-3.66386	-1.01088	3.2755	0.288494	0.141073	-0.553169
774	-0.757923	-2.32147	-1.54109	3.06997	0.06114	0.799772	-0.963951	-0.607233	-3.65203	-0.922023	3.51759	0.254831	0.164105	-0.271273
775	-0.817469	-2.37556	-1.35466	2.96884	0.0819345	0.836009	-0.886811	-0.627237	-3.64913	-0.899431	3.75159	0.179407	0.201127	-0.0223757
776	-0.977133	-2.34528	-1.30672	3.16307	0.0294669	0.987607	-0.899699	-0.725615	-3.66691	-0.925248	3.97068	0.0809798	0.248539	0.167055
777	-0.917425	-2.47582	-1.09994	3.16174	0.0581244	1.01129	-0.904041	-0.890649	-3.70974	-0.964014	4.16671	-0.0142864	0.300028	0.28113
778	-0.850671	-2.54064	-1.04975	3.05882	0.132261	1.01407	-0.754095	-1.0941	-3.77465	-0.973293	4.33151	-0.081585	0.350661	0.318689
779	-0.932925	-2.54007	-0.99148	3.02623	0.0666093	1.12579	-0.694797	-1.29864	-3.85342	-0.916507	4.45746	-0.105249	0.399893	0.294553
780	-0.933666	-2.48513	-0.933632	3.05454	0.0618501	1.19365	-0.645115	-1.46728	-3.93576	-0.773716	4.53761	-0.0825804	0.452025	0.236947
781	-0.867157	-2.56425	-0.770152	2.97786	0.0687925	1.127	-0.490586	-1.5723	-4.01244	-0.546747	4.56604	-0.0225539	0.514063	0.1812
782	-1.06018	-2.74347	-0.483875	3.03118	0.0611311	1.11502	-0.56583	-1.60123	-4.07727	-0.257115	4.53896	0.0595461	0.592417	0.161192
783	-0.842822	-2.64951	-0.390151	3.12643	0.152516	1.1262	-0.507588	-1.55859	-4.12762	0.0621496	4.45626	0.148907	0.690518	0.200927
784	-0.812914	-2.7464	-0.195713	3.14459	0.173082	1.12073	-0.349544	-1.46304	-4.16324	0.37761	4.32286	0.236517	0.808662	0.308666
785	-0.979136	-2.94806	0.302191	3.11066	0.278122	1.17875	-0.293479	-1.34117	-4.18431	0.66543	4.14931	0.321208	0.945958	0.475342
786	-0.814955	-2.90784	0.637282	3.11631	0.36101	1.10252	-0.144951	-1.21961	-4.18952	0.916885	3.95094	0.408147	1.1029	0.677674
787	-0.657729	-2.85566	0.856393	3.00575	0.3014	1.09756	-0.0406004	-1.11763	-4.17512	1.13785	3.74539	0.50502	1.28253	0.884871
788	-0.570325	-2.75791	1.0862	2.77284	0.25805	1.09203	0.04766	-1.04232	-4.13533	1.343	3.54919	0.617766	1.48877	1.06675
789	-0.537862	-2.84206	1.34599	2.81293	0.247642	1.08041	0.12902	-0.987455	-4.06395	1.54731	3.37444	0.747597	1.72199	1.20079
790	-0.620388	-2.62625	1.49749	2.66166	0.110076	1.13303	0.144017	-0.936443	-3.95663	1.75816	3.22672	0.890068	1.97408	1.27625
791	-0.523404	-2.65538	1.40784	2.7265	-0.102416	1.28755	0.121017	-0.868539	-3.81279	1.97083	3.10476	1.03577	2.22565	1.29478
792	-0.319776	-2.67179	1.46537	2.65632	-0.133389	1.2591	0.177424	-0.766592	-3.63678	2.16896	3.00223	1.17168	2.44776	1.26802
793	-0.2077	-2.69698	1.5975	2.6038	-0.18774	1.331	0.35857	-0.623854	-3.43767	2.32945	2.91081	1.28249	2.60809	1.21349
794	-0.34257	-2.55155	1.68045	2.50038	-0.213741	1.37743	0.380524	-0.447684	-3.22778	2.42997	2.82348	1.35195	2.68013	1.15021
795	-0.319691	-2.43422	1.83098	2.30912	-0.281502	1.43725	0.496233	-0.258773	-3.02028	2.45653	2.73669	1.36443	2.65147	1.09518
796	-0.130492	-2.2504	2.07131	2.23564	-0.317269	1.55755	0.486494	-0.0857399	-2.82653	2.4086	2.65057	1.3072	2.52809	1.06104
797	0.0155755	-1.86358	2.19896	2.21862	-0.219843	1.49368	0.654341	0.0432239	-2.65395	2.30014	2.56747	1.17357	2.33241	1.05471
798	0.214536	-1.83936	2.29635	2.00735	-0.208484	1.41388	0.709594	0.108863	-2.50494	2.15636	2.48925	0.966219	2.09611	1.07701
799	0.307851	-1.75957	2.23655	2.01181	-0.241759	1.37902	0.851337	0.106731	-2.37691	2.0072	2.41444	0.699079	1.85044	1.12305
800	0.207735	-1.7909	2.34442	1.81223	-0.27495	1.35857	0.923318	0.0483965	-2.26338	1.87991	2.33681	0.39648	1.61781	1.18355
801	0.213321	-1.76479	2.32727	1.72291	-0.277428	1.23109	0.935101	-0.0425427	-2.15586	1.79262	2.24586	0.0891539	1.40785	1.24689
802	0.0994156	-1.63249	2.40376	1.65634	-0.291567	1.12401	0.860706	-0.138239	-2.04602	1.75105	2.12917	-0.191929	1.21859	1.30178
803	0.0303078	-1.58121	2.34121	1.59672	-0.264707	1.10446	0.827249	-0.215487	-1.92768	1.74868	1.97599	-0.422032	1.04163	1.33983
804	0.0294908	-1.57412	2.43233	1.4887	-0.216094	1.10343	0.916573	-0.262716	-1.79826	1.76998	1.78081	-0.587226	0.868438	1.35682
805	-0.0537618	-1.56192	2.44586	1.39514	-0.191987	1.01006	0.827658	-0.28265	-1.65945	1.79533	1.54577	-0.68537	0.694802	1.35257
806	-0.210183	-1.57717	2.39824	1.27027	-0.189649	0.874831	0.694737	-0.289791	-1.51679	1.80597	1.28111	-0.723429	0.521786	1.32928
807	-0.019168	-1.4904	2.31331	1.09834	-0.119095	0.756752	0.670739	-0.303981	-1.37842	1.78762	1.00342	-0.712702	0.353643	1.28919
808	-0.0109302	-1.14593	2.18529	1.025	-0.167204	0.584086	0.667227	-0.342521	-1.25315	1.73213	0.732196	-0.66411	0.194508	1.23258
809	-0.112379	-1.17418	2.22497	0.825885	-0.14037	0.461199	0.514969	-0.413557	-1.14836	1.63752	0.485711	-0.585404	0.0460484	1.15744
810	-0.0844684	-1.05791	2.07582	0.69885	-0.148913	0.343293	0.381782	-0.512842	-1.06797	1.5071	0.277187	-0.4811	-0.0924939	1.06128
811	-0.18512	-0.895102	1.87192	0.623776	-0.110704	0.224787	0.340901	-0.624841	-1.01125	1.34837	0.112342	-0.354459	-0.221925	0.944207
812	-0.263037	-0.761412	1.70719	0.518293	-0.0827445	0.213462	0.134263	-0.727575	-0.972739	1.17195	-0.0110081	-0.209838	-0.339945	0.811779
813	-0.341539	-0.630707	1.54952	0.451103	-0.102041	0.216801	0.0172882	-0.799325	-0.943166	0.990334	-0.101027	-0.0537936	-0.439295	0.67608
814	-0.30941	-0.51512	1.22763	0.393533	-0.0853404	0.180808	-0.00821772	-0.825017	-0.911257	0.816345	-0.16819	0.105851	-0.508654	0.554064
815	-0.503305	-0.449755	0.945874	0.303815	-0.0820445	0.171848	-0.17334	-0.800393	-0.866136	0.661047	-0.22109	0.262364	-0.536392	0.463136
816	-0.627059	-0.308665	0.826119	0.189576	-0.0219453	0.102576	-0.261699	-0.732832	-0.799572	0.531721	-0.263023	0.412295	-0.515783	0.415657
817	-0.699227	-0.208485	0.66928	0.136127	0.0400444	0.118806	-0.282187	-0.638828	-0.707529	0.430693	-0.290575	0.555949	-0.449404	0.414559
818	-0.76626	-0.236585	0.496026	0.162571	0.131994	0.0576295	-0.389624	-0.539336	-0.590834	0.355914	-0.294888	0.695571	-0.350641	0.451757
819	-0.769387	-0.268763	0.248294	0.153676	0.294655	-0.0242894	-0.4549	-0.454643	-0.45503	0.303567	-0.265385	0.831872	-0.241363	0.510072
820	-0.877976	-0.356187	0.093408	0.13491	0.334443	-0.0604276	-0.484392	-0.400227	-0.309574	0.272034	-0.194873	0.960613	-0.146376	0.5681
821	-0.952271	-0.40016	-0.0239369	0.065047	0.433938	-0.0805384	-0.546869	-0.384736	-0.166565	0.26553	-0.0842892	1.07117	-0.0866507	0.606037
822	-1.01744	-0.439139	-0.0910422	0.0108156	0.519431	-0.143383	-0.644665	-0.41036	-0.0391833	0.295443	0.054707	1.14814	-0.0738479	0.610237
823	-1.11106	-0.498578	-0.0924489	-0.0736061	0.524223	-0.175444	-0.704986	-0.474784	0.0598831	0.378247	0.200524	1.17561	-0.108031	0.575126
824	-1.16295	-0.6153	-0.0590895	-0.127214	0.561437	-0.206437	-0.742564	-0.573337	0.119939	0.530173	0.325722	1.14245	-0.179119	0.502315
825	-1.12613	-0.554487	0.163511	-0.234814	0.575059	-0.174432	-0.717902	-0.700299	0.133735	0.760225	0.403051	1.04622	-0.271266	0.397828
826	-1.39271	-0.592412	0.288354	-0.36699	0.639116	-0.115169	-0.678766	-0.848875	0.098708	1.06413	0.411479	0.894085	-0.368495	0.269037
827	-1.46387	-0.621021	0.578171	-0.423983	0.673448	-0.122811	-0.604665	-1.01007	0.0176958	1.42191	0.340408	0.700464	-0.459491	0.122696
828	-1.44018	-0.642736	0.890873	-0.52934	0.509309	-0.120814	-0.590555	-1.17143	-0.101263	1.80047	0.191076	0.482356	-0.539968	-0.0353709
829	-1.31332	-0.652753	0.987206	-0.457508	0.341186	0.142676	-0.634551	-1.31696	-0.246285	2.16067	-0.0248822	0.254448	-0.612218	-0.199464
830	-1.46882	-0.790393	1.33385	-0.537213	0.287628	0.0717844	-0.644419	-1.42889	-0.40408	2.46652	-0.288778	0.0258313	-0.682539	-0.363194
831	-1.56026	-0.795187	1.64094	-0.647215	0.163067	0.117301	-0.694047	-1.49104	-0.562928	2.69353	-0.578741	-0.200549	-0.757767	-0.519545
832	-1.66406	-0.848441	1.78405	-0.742993	-0.0625503	0.131125	-0.737633	-1.49267	-0.715374	2.83316	-0.873031	-0.42594	-0.842202	-0.661971
833	-1.86851	-1.0324	1.79295	-0.681636	-0.281384	0.144259	-0.841578	-1.43114	-0.859632	2.89209	-1.15243	-0.652621	-0.935953	-0.785878
834	-1.73473	-1.05494	1.92916	-0.796782	-0.529251	0.111482	-0.885012	-1.31213	-0.999063	2.88686	-1.40186	-0.881071	-1.03485	-0.88958
835	-1.59974	-1.15569	2.04002	-1.0569	-0.910192	0.159825	-0.920503	-1.14708	-1.13982	2.83631	-1.61163	-1.10855	-1.13148	-0.973975
836	-1.28309	-0.989613	2.07146	-1.13644	-1.14439	0.207623	-0.898213	-0.948948	-1.28739	2.75489	-1.77823	-1.32936	-1.21684	-1.04091
837	-1.03369	-0.98772	2.00421	-1.27453	-1.3654	0.186412	-0.865916	-0.72786	-1.44312	2.64892	-1.90451	-1.53626	-1.28202	-1.091
838	-0.878541	-1.01883	1.88025	-1.26301	-1.70031	0.146983	-0.849249	-0.4887	-1.60233	2.517	-1.99846	-1.72211	-1.31962	-1.12234
839	-0.519884	-1.03655	1.78418	-1.42901	-1.97184	0.144158	-0.905694	-0.231564	-1.75465	2.35366	-2.07041	-1.8811	-1.32472	-1.13082
840	-0.271388	-1.03041	1.71141	-1.61135	-2.23971	0.120547	-0.944272	0.0451793	-1.88689	2.15429	-2.12939	-2.00924	-1.29552	-1.11222
841	-0.173437	-0.998908	1.68807	-1.58037	-2.32088	0.055994	-0.863811	0.340782	-1.98721	1.91909	-2.17968	-2.10428	-1.23365	-1.06512
842	0.26484	-1.06656	1.54084	-1.75344	-2.61421	0.122146	-0.894177	0.648947	-2.0492	1.65477	-2.21919	-2.16533	-1.14415	-0.993118
843	0.561142	-0.879526	1.55523	-1.8564	-2.72457	0.201515	-0.896823	0.957228	-2.0741	1.37371	-2.24056	-2.19254	-1.03492	-0.904903
844	0.942641	-0.798001	1.4144	-2.02626	-2.98446	0.240318	-0.845908	1.24948	-2.07032	1.09126	-2.23513	-2.18696	-0.91576	-0.811784
845	1.16838	-0.738683	1.33332	-2.1683	-2.8343	0.291975	-0.843298	1.51032	-2.05014	0.822674	-2.19804	-2.15034	-0.796844	-0.723723
846	1.37919	-0.686181	1.18511	-2.25168	-2.74148	0.298898	-0.838496	1.72958	-2.02492	0.580605	-2.13215	-2.08482	-0.687283	-0.645618
847	1.56332	-0.593721	1.08736	-2.27268	-2.62984	0.329044	-0.773284	1.90486	-2.00062	0.37368	-2.04859	-1.99253	-0.593979	-0.575542
848	1.67474	-0.504852	0.944976	-2.39282	-2.53285	0.270953	-0.687472	2.04102	-1.97571	0.205946	-1.96331	-1.8754	-0.521085	-0.505969
849	1.97965	-0.349382	0.832065	-2.41814	-2.33189	0.200941	-0.649154	2.14669	-1.9425	0.0767708	-1.89057	-1.73531	-0.469955	-0.427803
850	2.03148	-0.440162	0.582829	-2.35155	-2.11875	0.138495	-0.674212	2.22949	-1.89136	-0.0191159	-1.83616	-1.57471	-0.43937	-0.335523
851	2.18698	-0.411365	0.551065	-2.35842	-2.03212	0.165622	-0.664915	2.29204	-1.81632	-0.091337	-1.79338	-1.39752	-0.425776	-0.231118
852	2.326	-0.455794	0.510295	-2.35156	-1.92861	0.200379	-0.619658	2.33042	-1.71959	-0.152892	-1.74402	-1.20987	-0.423379	-0.125047
853	2.48896	-0.456399	0.279105	-2.23139	-1.76316	0.159413	-0.608538	2.33572	-1.61312	-0.21808	-1.66424	-1.0201	-0.424271	-0.0337502
854	2.6716	-0.380057	0.0967375	-2.18337	-1.55826	0.0889126	-0.388364	2.2982	-1.51617	-0.299364	-1.53313	-0.837889	-0.419008	0.0254922
855	2.98173	-0.204927	-0.066163	-2.21043	-1.55976	0.249122	-0.362483	2.21229	-1.44962	-0.403949	-1.34078	-0.672448	-0.397891	0.040451
856	2.99811	-0.343663	-0.265185	-1.9639	-1.45712	0.205512	-0.395096	2.08025	-1.42892	-0.531323	-1.09243	-0.530722	-0.352822	0.00829132
857	2.9313	-0.408525	-0.477485	-1.75797	-1.28019	0.221596	-0.369671	1.91305	-1.45871	-0.672921	-0.806931	-0.41603	-0.279302	-0.0632182
858	3.01757	-0.532637	-0.823288	-1.55494	-1.19423	0.238371	-0.350342	1.72811	-1.53101	-0.814362	-0.51024	-0.327604	-0.177851	-0.157976
859	2.99102	-0.676537	-0.980162	-1.23347	-1.16317	0.221973	-0.370861	1.5447	-1.62791	-0.939719	-0.226805	-0.261205	-0.0540935	-0.256476
860	3.04693	-0.761034	-1.20588	-0.940087	-1.1719	0.246238	-0.428653	1.3788	-1.72773	-1.03625	0.0277218	-0.210599	0.0827718	-0.341766
861	3.17635	-0.651617	-1.29268	-0.796621	-1.22034	0.280347	-0.442279	1.23928	-1.81238	-1.09775	0.249875	-0.16932	0.22273	-0.40444
862	3.00656	-0.63548	-1.43112	-0.507163	-0.926253	0.282874	-0.356097	1.12638	-1.87315	-1.12522	0.446946	-0.132225	0.357941	-0.444949
863	2.79367	-0.699224	-1.46213	-0.339139	-0.893722	0.281329	-0.45128	1.03311	-1.91283	-1.12463	0.631873	-0.0965811	0.484672	-0.472576
864	2.73071	-0.531337	-1.50572	-0.46363	-0.790643	0.305955	-0.418347	0.948509	-1.94355	-1.103	0.817096	-0.0624844	0.603253	-0.501596
865	2.72234	-0.724268	-1.67907	-0.27335	-0.686311	0.261809	-0.375575	0.861844	-1.98142	-1.06466	1.01013	-0.032649	0.716056	-0.545816
866	2.56048	-0.828725	-1.61049	-0.121943	-0.767523	0.204615	-0.390756	0.766124	-2.04009	-1.00962	1.21241	-0.0117943	0.824444	-0.613132
867	2.488	-0.991545	-1.67679	0.0869172	-0.984146	0.149059	-0.5038	0.65995	-2.12583	-0.934814	1.42119	-0.00558608	0.926242	-0.701958
868	2.25894	-1.08758	-1.83265	0.409541	-1.03478	0.189282	-0.522394	0.547285	-2.23598	-0.837586	1.63296	-0.0190259	1.01516	-0.800875
869	2.06522	-1.30078	-1.87955	0.565099	-1.05913	0.21049	-0.530255	0.435459	-2.36081	-0.719647	1.84639	-0.0546153	1.08265	-0.891673
870	1.97445	-1.31713	-1.7862	0.713962	-1.00352	0.165424	-0.562065	0.332348	-2.48796	-0.589515	2.0635	-0.110835	1.12159	-0.954688
871	2.00153	-1.32943	-1.79323	1.00154	-0.945881	0.162701	-0.63048	0.243673	-2.60727	-0.461965	2.28836	-0.18138	1.12992	-0.974742
872	2.00099	-1.39527	-1.82238	1.07204	-1.04499	0.23711	-0.685373	0.171229	-2.71403	-0.354364	2.52446	-0.255572	1.1127	-0.945834
873	1.81854	-1.58433	-1.76362	1.2853	-1.12533	0.196063	-0.73555	0.112595	-2.80946	-0.281333	2.77209	-0.320326	1.08123	-0.872794
874	1.7115	-1.55116	-1.72073	1.45207	-1.10013	0.107728	-0.750582	0.0623978	-2.89894	-0.249948	3.02716	-0.363427	1.04944	-0.769058
875	1.62769	-1.72066	-1.86278	1.7333	-1.1445	0.059664	-0.807885	0.0146293	-2.98876	-0.257443	3.2819	-0.377184	1.02885	-0.651597
876	1.56311	-1.7853	-1.86798	1.9373	-1.14705	0.0346788	-0.779272	-0.0347079	-3.08301	-0.292267	3.52709	-0.36118	1.02409	-0.535191
877	1.45169	-1.67995	-1.81383	1.86221	-1.20093	-0.0497122	-0.641647	-0.0855001	-3.18203	-0.338052	3.75455	-0.323089	1.03112	-0.428279
878	1.47495	-1.76572	-1.91369	2.12612	-1.0512	-0.0730105	-0.536387	-0.132897	-3.28264	-0.378875	3.9588	-0.277013	1.0388	-0.331964
879	1.15334	-1.92195	-1.84083	2.22958	-0.986267	-0.102913	-0.399364	-0.168658	-3.37973	-0.403699	4.13737	-0.239552	1.03323	-0.242605
880	1.0753	-1.94841	-1.75211	2.2647	-0.889971	-0.188549	-0.389042	-0.184236	-3.46808	-0.408491	4.28996	-0.224822	1.003	-0.156627
881	0.98718	-1.99438	-1.73184	2.36989	-0.7894	-0.104971	-0.377302	-0.174663	-3.54348	-0.395826	4.41731	-0.240285	0.943394	-0.0749959
882	0.96189	-1.92372	-1.60367	2.46433	-0.698417	-0.0912672	-0.308612	-0.141771	-3.60284	-0.372783	4.52046	-0.284897	0.857954	-0.00502345
883	0.938652	-2.06925	-1.59378	2.22371	-0.575909	-0.0867181	-0.29375	-0.0951492	-3.6435	-0.348245	4.60078	-0.350148	0.756967	0.0417052
884	0.715289	-2.18116	-1.40429	2.48174	-0.467321	-0.211277	-0.334672	-0.0499418	-3.66271	-0.330584	4.66058	-0.423493	0.653828	0.0547043
885	0.580446	-2.26624	-1.2676	2.75273	-0.464907	-0.133287	-0.281412	-0.0218263	-3.65793	-0.326205	4.70333	-0.492789	0.560847	0.030856
886	0.552102	-2.36206	-1.04921	2.96872	-0.384602	-0.220497	-0.320352	-0.0208865	-3.62799	-0.33872	4.73295	-0.549863	0.485969	-0.0215889
887	0.485353	-2.39818	-1.02198	2.98278	-0.370037	-0.202844	-0.253683	-0.0467975	-3.57474	-0.368146	4.7518	-0.591742	0.431365	-0.0835748
888	0.472625	-2.2784	-0.898442	2.93477	-0.221998	-0.199199	-0.139416	-0.0875391	-3.50429	-0.409977	4.75828	-0.619146	0.394052	-0.130698
889	0.525461	-2.27274	-0.802999	3.01006	-0.164579	-0.344044	-0.175688	-0.122733	-3.42685	-0.454581	4.74522	-0.633194	0.367813	-0.141791
890	0.443172	-2.48634	-0.6218	3.17986	-0.0478447	-0.348244	-0.239023	-0.130932	-3.35502	-0.487711	4.7003	-0.632186	0.345496	-0.107343
891	0.445551	-2.53873	-0.590879	3.2045	-0.0188342	-0.348463	-0.301397	-0.0983404	-3.30114	-0.492845	4.60882	-0.610281	0.321067	-0.0341482
892	0.413944	-2.5665	-0.544441	3.19019	-0.0209588	-0.398159	-0.329959	-0.0254896	-3.27433	-0.455298	4.45854	-0.559005	0.291136	0.0560728
893	0.598311	-2.69621	-0.632973	3.16394	-0.0732581	-0.530685	-0.390106	0.0710004	-3.27849	-0.366933	4.24501	-0.471171	0.255776	0.133835
894	0.728063	-2.75497	-0.668352	3.10898	-0.0804559	-0.502811	-0.393776	0.162625	-3.31183	-0.229629	3.97536	-0.34554	0.218607	0.172136
895	0.738336	-2.83198	-0.69586	3.16935	-0.116549	-0.394912	-0.49993	0.217921	-3.36795	-0.0558875	3.6687	-0.189981	0.186114	0.155903
896	0.776957	-2.92114	-0.577512	3.38756	-0.0446243	-0.466704	-0.575577	0.212946	-3.43768	0.134043	3.35274	-0.0213777	0.166057	0.0870688
897	0.610602	-2.82881	-0.356544	3.23968	-0.0170946	-0.411557	-0.532796	0.139401	-3.51087	0.317804	3.05747	0.13807	0.165024	-0.016601
898	0.722028	-2.92808	-0.424752	3.20802	-0.0128237	-0.569462	-0.520141	0.00736401	-3.57769	0.477316	2.80797	0.266826	0.185717	-0.128278
899	0.55071	-2.99751	-0.191811	3.35809	0.00588472	-0.792157	-0.499472	-0.158277	-3.62917	0.603417	2.61876	0.350034	0.224915	-0.221602
900	0.434564	-3.03948	0.026862	3.28704	0.041579	-0.833857	-0.489387	-0.326171	-3.65748	0.69692	2.49144	0.383281	0.273038	-0.279274
901	0.543618	-3.1784	0.107545	3.15716	0.0922501	-0.908827	-0.613214	-0.468488	-3.65653	0.765874	2.41619	0.372698	0.315984	-0.297684

## Sheet: Figure 3b
Figure 3b
			Variable
	Subject	Fold	Shape PC1	Shape PC2	Shape PC3	Shape PC4	Shape PC5	Shape PC6	Shape PC7
	Monkey R	1	0.703141	0.706987	0.579759	0.700837	0.466536	0.413642	0.160366
	Monkey R	2	0.770043	0.745092	0.717445	0.778706	0.454778	0.427436	0.293448
	Monkey R	3	0.735875	0.790149	0.716829	0.749448	0.522183	0.43926	0.356939
	Monkey R	4	0.772983	0.748715	0.71805	0.726699	0.456047	0.419183	0.32282
	Monkey R	5	0.739318	0.766106	0.698417	0.797781	0.386164	0.338239	0.303944
	Monkey R	6	0.742015	0.752592	0.737122	0.794648	0.465484	0.367703	0.200305
	Monkey Y	1	0.580717	0.497344	0.179233	0.277731	0.262469	0.104834	0.210126
	Monkey Y	2	0.660492	0.489115	0.408369	0.32556	0.322919	0.237826	0.107086
	Monkey Y	3	0.738876	0.599013	0.522588	0.368448	0.382989	0.272486	0.0819968
	Monkey Y	4	0.601115	0.537852	0.383181	0.188767	0.270521	0.217571	0.171838
	Monkey Y	5	0.703754	0.559039	0.391798	0.304972	0.417394	0.253972	0.0845465
	Monkey Y	6	0.610118	0.434472	0.574766	0.31464	0.415443	0.179595	0.00269215

## Sheet: Figure 4a
Figure 4a
			Variable
	Subject	Array	Sagittal Flexion	Protrusion	Roll	Length (Anterior)	Width (Anterior)	Length (Middle)	Width (Middle)	Shape PC1	Shape PC2	Shape PC3	Shape PC4	Shape PC5	Shape PC6	Shape PC7
	Monkey R	M1	0.64335	0.711583	0.778195	0.666114	0.683095	0.397173	0.744082	0.637554	0.680698	0.611451	0.727562	0.369081	0.303432	0.267725
	Monkey R	SC	0.109439	0.0977926	0.309294	0.147414	0.218637	0.0486098	0.286221	0.0825732	0.377939	0.0838929	0.152396	0.0865344	0.0660052	0.0564393
	Monkey Y	M1	0.343983	0.470352	0.625213	0.517265	0.605528	0.441744	0.382161	0.565664	0.505403	0.365731	0.20311	0.205506	0.153019	0.111746
	Monkey Y	SC	0.2322	0.352567	0.34333	0.359635	0.382384	0.317046	0.219378	0.397872	0.382797	0.290557	0.112666	0.155067	0.137172	0.189879

## Sheet: Figure 4b
Figure 4b
				Number of Neurons
	Subject	Variable Type	Value	1	5	10	15	20	25	30	35	40	45	50	60	70	80	90	100
	Monkey R	Kinematics	Mean	0.0505559	0.199962	0.311785	0.479181	0.539624	0.485287	0.571679	0.56121	0.620966	0.633821	0.635919	0.682564	0.698857	0.708052	0.706589	0.732715
	Monkey R	Kinematics	STD	0.0617654	0.0784597	0.112802	0.0823092	0.0301725	0.0866875	0.028057	0.0313647	0.0214971	0.0142944	0.0187741	0.00765569	0.00270127	0.00715779	0.00580022	0.0133872
	Monkey R	Shape	Mean	0.049747	0.167867	0.296429	0.464855	0.517677	0.461496	0.520712	0.536868	0.578938	0.592542	0.61086	0.644572	0.639239	0.668758	0.64981	0.689578
	Monkey R	Shape	STD	0.0636244	0.068831	0.0835153	0.0425655	0.0211769	0.0439033	0.0208894	0.0381115	0.0173152	0.0165077	0.0208702	0.0106766	0.002919	0.0145526	0.00941872	0.00664666
	Monkey Y	Kinematics	Mean	0.0427294	0.150668	0.287934	0.346212	0.347435	0.361974	0.468658	0.459823	0.488463	0.464141	0.483847	0.522935	0.514146	0.519094	0.530609	0.535549
	Monkey Y	Kinematics	STD	0.0697952	0.0829841	0.0695983	0.0487199	0.0917421	0.0243796	0.0424287	0.0501561	0.0341695	0.0268874	0.0108324	0.0234672	0.00257693	0.0349274	0.00232324	0.014339
	Monkey Y	Shape	Mean	0.00992508	0.127068	0.229429	0.264625	0.280463	0.313812	0.40592	0.384478	0.359962	0.411895	0.396603	0.416658	0.437462	0.439603	0.431984	0.449841
	Monkey Y	Shape	STD	0.0589422	0.10771	0.0412206	0.039607	0.0936891	0.0326399	0.0375677	0.0265515	0.0625478	0.0250472	0.0370798	0.0384672	0.0215477	0.0339015	0.0095875	0.0160181

## Sheet: Figure 4c
Figure 4c
	Unbinned R2 Values (each value is one variable for one neuron)
	Monkey R	Monkey Y
	0.360486	0.35806
	0.343656	0.304265
	0.332581	0.300806
	0.290601	0.284549
	0.284416	0.279217
	0.256955	0.264242
	0.256432	0.24962
	0.245156	0.238429
	0.24135	0.237934
	0.23113	0.230575
	0.230163	0.229948
	0.22455	0.22089
	0.220302	0.218543
	0.214191	0.217779
	0.210904	0.211216
	0.210313	0.205883
	0.208488	0.201323
	0.205966	0.191958
	0.205185	0.185186
	0.198528	0.183585
	0.198499	0.182126
	0.197882	0.177986
	0.185447	0.166809
	0.183613	0.158561
	0.17827	0.153373
	0.178269	0.151667
	0.177924	0.149994
	0.176449	0.147714
	0.168699	0.147658
	0.168229	0.145371
	0.165976	0.142307
	0.164688	0.140886
	0.158764	0.140349
	0.156382	0.137587
	0.156322	0.136594
	0.155734	0.134777
	0.153837	0.129988
	0.151621	0.129056
	0.146214	0.128224
	0.136423	0.127668
	0.130118	0.126968
	0.128141	0.126747
	0.127123	0.125259
	0.124513	0.122932
	0.123674	0.122066
	0.122725	0.121816
	0.110337	0.121039
	0.10966	0.120965
	0.108422	0.120953
	0.108314	0.118152
	0.106337	0.116787
	0.106042	0.116003
	0.105687	0.115544
	0.105098	0.115334
	0.104191	0.113359
	0.104028	0.112749
	0.10303	0.111135
	0.102354	0.110356
	0.101761	0.109303
	0.100333	0.10671
	0.0999036	0.106288
	0.099836	0.104432
	0.0994438	0.102113
	0.096976	0.10117
	0.0965454	0.100235
	0.0954029	0.0968237
	0.0940039	0.096458
	0.0926335	0.0951487
	0.0925895	0.0937352
	0.0918772	0.093522
	0.0902046	0.0905677
	0.0872089	0.0904154
	0.0828066	0.0901406
	0.0799623	0.0869145
	0.0796975	0.0860957
	0.079092	0.0859303
	0.0777673	0.0857923
	0.0753094	0.0857632
	0.0718419	0.0849626
	0.0687188	0.0848693
	0.0659444	0.0845777
	0.0655476	0.0841657
	0.0637464	0.0831097
	0.0636564	0.0827051
	0.0631617	0.0823162
	0.0615148	0.0812024
	0.060356	0.0808148
	0.0598417	0.0806485
	0.0597005	0.0802678
	0.0581906	0.0792847
	0.0580318	0.0768777
	0.0572374	0.0767539
	0.0571949	0.0755845
	0.0570261	0.074026
	0.0568429	0.0683077
	0.0568321	0.0670155
	0.055517	0.065568
	0.0550881	0.0650874
	0.0534385	0.0649538
	0.0530387	0.0577774
	0.0521501	0.0575397
	0.0510599	0.0566165
	0.0509024	0.0526445
	0.0495564	0.0524243
	0.0490865	0.0507243
	0.0481835	0.050711
	0.0469933	0.0504647
	0.0468707	0.0503407
	0.0467161	0.04905
	0.0465966	0.0482914
	0.0464531	0.0471029
	0.0462003	0.0470156
	0.0461388	0.0465004
	0.0450894	0.0457958
	0.0449072	0.0446142
	0.0438997	0.0416878
	0.0432181	0.0400818
	0.0427971	0.0398481
	0.0427084	0.0398094
	0.0419973	0.037542
	0.0418447	0.0374698
	0.0414425	0.0360989
	0.0407749	0.0349384
	0.040326	0.0335396
	0.0394538	0.0333525
	0.0387271	0.0330568
	0.0385787	0.0327142
	0.0361577	0.0311791
	0.0360653	0.0310488
	0.0350923	0.0307056
	0.0347689	0.0304698
	0.0337945	0.0296857
	0.0317987	0.0268412
	0.0316067	0.0265272
	0.0313927	0.0264745
	0.0295361	0.0260215
	0.029053	0.0259944
	0.0278042	0.0250254
	0.0268245	0.0248566
	0.026563	0.0229618
	0.026211	0.0222568
	0.0249999	0.0220212
	0.024568	0.021516
	0.0242625	0.0211764
	0.0233124	0.0208822
	0.0228246	0.0190236
	0.0226513	0.0172821
	0.0216432	0.0164761
	0.0200639	0.015217
	0.0193313	0.0139029
	0.0192478	0.0132897
	0.0185442	0.0127744
	0.0181263	0.0122818
	0.0175202	0.0120677
	0.0166674	0.0117747
	0.0161311	0.0113545
	0.0158481	0.0106203
	0.0158451	0.00970086
	0.0155531	0.0077684
	0.0153848	0.00716599
	0.015185	0.00681611
	0.0149176	0.00583947
	0.013865	0.00557834
	0.0137078	0.00514899
	0.0131239	0.00470561
	0.0126797	0.00446866
	0.0116714	0.00409401
	0.0116657	0.00358484
	0.0106561	0.00342577
	0.0101456	0.00195504
	0.0096571	0.00183426
	0.00953105	0.00161846
	0.00949319	0.00146657
	0.00904663	0.00122555
	0.00786497	0.00113291
	0.00776806
	0.00744758
	0.00733541
	0.00702271
	0.00500969
	0.00460275
	0.0044496
	0.00436455
	0.00435886
	0.00317603
	0.00315118
	0.00296621
	0.00231451
	0.00180872
	0.00102484
